# Supplementary material for: Effect of corticosteroid administration on neurologically deceased organ donors and transplant recipients: a systematic review and meta-analysis
Source: PubMed Central journal article supplement — BMJ Open. 2017 Jun 30;7(6):e014436. doi: 10.1136/bmjopen-2016-014436 (PMC5734295; doi:10.1136/bmjopen-2016-014436), 2017-06-30
Supplement: bmjopen-2016-014436.draft_revisions.pdf [file bmjopen-2016-014436.draft_revisions.pdf]

# BMJ Open

## Effect of Corticosteroid Administration on Neurologically Deceased Organ Donors and Transplant Recipients : A Systematic Review and Meta-Analysis

|                                 |                                                                                                                                                                                                                                                                                                                                                                                                                                                                                                                                                                                                                                        |
|---------------------------------|----------------------------------------------------------------------------------------------------------------------------------------------------------------------------------------------------------------------------------------------------------------------------------------------------------------------------------------------------------------------------------------------------------------------------------------------------------------------------------------------------------------------------------------------------------------------------------------------------------------------------------------|
| Journal:                        | <i>BMJ Open</i>                                                                                                                                                                                                                                                                                                                                                                                                                                                                                                                                                                                                                        |
| Manuscript ID                   | bmjopen-2016-014436                                                                                                                                                                                                                                                                                                                                                                                                                                                                                                                                                                                                                    |
| Article Type:                   | Research                                                                                                                                                                                                                                                                                                                                                                                                                                                                                                                                                                                                                               |
| Date Submitted by the Author:   | 11-Oct-2016                                                                                                                                                                                                                                                                                                                                                                                                                                                                                                                                                                                                                            |
| Complete List of Authors:       | D'Aragon, Frédéric; Université de Sherbrooke Faculté de médecine et des sciences de la santé, Anesthesiology; Centre de recherche du CHUS, Belley-Côté, Émilie; McMaster University, Clinical Epidemiology and Biostatistics<br>Agarwal, Arnav; McMaster University, Clinical Epidemiology and Biostatistics<br>Frenette, Anne-Julie; Université de Montréal<br>Lamontagne, Françoise; Université de Sherbrooke<br>Guyatt, Gordon; McMaster University, Clinical Epidemiology and Biostatistics<br>Dhanani, Sonny; University of Ottawa, Critical Care<br>Meade, Maureen; McMaster University, Clinical Epidemiology and Biostatistics |
| <b>Primary Subject Heading</b>: | Intensive care                                                                                                                                                                                                                                                                                                                                                                                                                                                                                                                                                                                                                         |
| Secondary Subject Heading:      | Surgery                                                                                                                                                                                                                                                                                                                                                                                                                                                                                                                                                                                                                                |
| Keywords:                       | INTENSIVE & CRITICAL CARE, tissues and organ procurement, TRANSPLANT MEDICINE, Graft rejection, Methylprednisolone, Brain death                                                                                                                                                                                                                                                                                                                                                                                                                                                                                                        |
|                                 |                                                                                                                                                                                                                                                                                                                                                                                                                                                                                                                                                                                                                                        |

SCHOLARONE™  
Manuscripts

1  
2  
3 1 **EFFECT OF CORTICOSTEROID ADMINISTRATION ON NEUROLOGICALLY DECEASED ORGAN**  
4  
5 2 **DONORS AND TRANSPLANT RECIPIENTS : A SYSTEMATIC REVIEW AND META-ANALYSIS**  
6

7 3 **My manuscript is submitted as an original works:**  
8

9 4 **Authors:**

10  
11 5 Frederick D'Aragon, M.D.<sup>1,4</sup>; Emilie Belley-Cote, M.D.<sup>1</sup>; Arnav Agarwal, BSc<sup>1,2</sup>; Anne-Julie Frenette,  
12  
13 6 MSc<sup>3</sup>; Francois Lamontagne, M.D., MSc<sup>4</sup>; Gordon Guyatt, M.D., MSc<sup>1,6</sup>; Sonny Dhanani, M.D.<sup>5</sup>; Maureen  
14  
15 7 O. Meade, M.D., MSc<sup>1,6</sup>  
16  
17

18 8 **Affiliations:**

19 9 <sup>1</sup>Department of Clinical Epidemiology and Biostatistics, McMaster University, Hamilton, Ontario,  
20  
21 10 Canada  
22

23 11 <sup>2</sup>Faculty of Medicine, University of Toronto, Toronto, Ontario, Canada, L8S 4K1  
24

25 12 <sup>3</sup>University of Montreal, Faculty of Pharmacy ; Hopital Sacre Cœur de Montreal, Montréal, Québec,  
26  
27 13 Canada, H3C 3J7  
28  
29

30 14 <sup>4</sup>Centre de Recherche du Centre Hospitalier Universitaire de Sherbrooke et Faculté de médecine et  
31  
32 15 des sciences de la santé, Université de Sherbrooke, Sherbrooke, Québec, Canada, J1H 5N4  
33

34 16 <sup>5</sup>Critical Care, Children's Hospital of Eastern Ontario; Associate Professor, Department of Medicine,  
35  
36 17 University of Ottawa, K1H 8L1  
37  
38

39 18 <sup>6</sup>Departments of Medicine, McMaster University, Hamilton, Ontario, Canada, L8S 4K1  
40

41 19 **Email addresses of authors:**

42  
43 20 [frederick.daragon@usherbrooke.ca](mailto:frederick.daragon@usherbrooke.ca)

44  
45 21 [emilie-Prudence.Belley-Cote@USherbrooke.ca](mailto:emilie-Prudence.Belley-Cote@USherbrooke.ca)

46  
47 22 [arnav.mcmaster@gmail.com](mailto:arnav.mcmaster@gmail.com)

48  
49 23 [anne.julie.frenette@umontreal.ca](mailto:anne.julie.frenette@umontreal.ca)

50  
51 24 [Francois.Lamontagne@USherbrooke.ca](mailto:Francois.Lamontagne@USherbrooke.ca)

52  
53 25 [guyatt@mcmaster.ca](mailto:guyatt@mcmaster.ca)

54  
55 26 [sdhanani@cheo.on.ca](mailto:sdhanani@cheo.on.ca)

56  
57 27 [meadema@HHSC.CA](mailto:meadema@HHSC.CA)  
58  
59  
60

## 28 **ABSTRACT**

29 **Objectives** : This review investigate the impact of corticosteroids on donation rates and  
30 transplant outcomes in light of findings from randomized controlled trials (RCTs) and to  
31 highlight the sources of uncertainty in this unresolved donor management issue.

32 **Data Sources** : We searched electronic databases, trial registries, and conference  
33 proceedings for RCTs evaluating corticosteroid therapy in neurologically deceased  
34 donors.

35 **Study Selection & Data Extraction** : Independent reviewers assessed eligibility,  
36 evaluated risk of bias, and abstracted data, including donor hemodynamic data, number  
37 of organs recovered, and transplant outcomes. Where possible, we pooled results. For  
38 each outcome we assessed the overall quality of evidence using GRADE methodology.

39 **Data Synthesis**: Eleven RCTs with different corticosteroid regimens were included.  
40 Most trials assessed a once-daily infusion of methylprednisolone. Aside from one study  
41 showing improved liver graft function, no individual study or pooled analysis showed  
42 benefit of corticosteroids for any outcome: vasopressor use (3 trials; relative risk [RR]  
43 0.96; 95% confidence interval [CI] 0.89 to 1.05), multiple organs recovered (2 trials; RR  
44 0.82; 95% CI 0.61 to 1.11), acute graft rejection (3 trials; RR 0.91; 95% CI 0.60 to 1.39)  
45 or graft dysfunction (8 trials; RR 1.01; 95% CI 0.83 to 1.24). Two trials investigated  
46 adverse effects and found similar rates between groups. Quality of evidence was  
47 moderate or low for all outcomes.

48 **Conclusion** : Current clinical trials do not identify benefits or harms of corticosteroid  
49 therapy for deceased organ donors. In the face of these results, administering or  
50 withholding steroids both appear reasonable courses of action.

## 51 Strengths

- 52 • Comprehensive search,
- 53 • Independent duplicate assessments of study eligibility,
- 54 • Risk of bias,
- 55 • Data abstraction,
- 56 • The pooling of results across studies where possible.

57

## 58 Limitation

- 59 • Inability to address differences in effect with different dosing regimens, or  
60 between organ types (because of small number of studies to support such  
61 subgroup analyses),
- 62 • Small risk of bias,
- 63 • Indirectness of evidence,
- 64 • Inconsistency and imprecision.

65

## 66 INTRODUCTION

67 For patients with end-stage organ dysfunction, transplantation is a life-saving  
68 intervention. Universally, organs available for transplantation are insufficient to meet  
69 population needs. (1) Optimal medical management of deceased organ donors may help  
70 to address this shortage. (2, 3)

71 In the process that culminates in neurological death, cerebral herniation can induce a  
72 catecholamine storm that, when severe, leads to cardiovascular collapse.  
73 Hemodynamic instability of any degree threatens the viability of potentially recoverable

1  
2  
3 74 organs (4) and disturbances in the hypothalamo-pituitary-adrenal axis can be an  
4  
5 75 important contributor. (5) Though the prevalence of adrenal insufficiency among  
6  
7 76 neurologically deceased organ donors is uncertain, (6-9) corticosteroid therapy may  
8  
9  
10 77 alleviate hemodynamic collapse during cerebral herniation.

11  
12 78 Cerebral herniation also activates a systemic inflammatory response; thus, anti-  
13  
14 79 inflammatory properties of corticosteroid offer another potential mechanism of benefit.  
15  
16  
17 80 (10, 11) Intuitively, inflammation will jeopardize the suitability of organs for  
18  
19 81 transplantation, but prospective cohort studies have generated conflicting results. (12-  
20  
21 82 14)

22  
23  
24 83 In theory, treatment of potential organ donors with corticosteroids could improve their  
25  
26 84 hemodynamic status, improve organ suitability and attenuate post-transplant organ  
27  
28 85 dysfunction. The *Society of Critical Care Medicine*, the *American College of Chest*  
29  
30 86 *Physicians*, and the *Association of Organ Procurement Organizations*, recommend high-  
31  
32  
33 87 dose corticosteroid for organ donation following neurological death. (15) One recent  
34  
35 88 systematic review addressing this topic concluded that existing research neither  
36  
37 89 confirms nor refutes the efficacy of corticosteroid therapy for neurologically deceased  
38  
39  
40 90 donors. (16) To advance this field, we applied GRADE methodology to further define the  
41  
42 91 quality of current evidence, the specific limitations of previously reported trials, and  
43  
44 92 future research needed to clarify the effects of systemic corticosteroid therapy in  
45  
46  
47 93 neurologically deceased donors. (17)

1  
2  
3 944  
5 95 **METHODS**6  
7 96 **Eligibility Criteria**

8 97 We included published and unpublished randomized controlled trials (RCTs) enrolling  
9  
10 98 neurologically deceased potential organ donors and comparing corticosteroids to  
11  
12 99 placebo, to no administration of corticosteroids, or to other active treatments. We  
13  
14 100 focused on the following outcomes: 1) vasopressor requirement among donors; 2) organ  
15  
16 101 recovery from donors; 3) recipient graft rejection; 4) recipient graft dysfunction (using  
17  
18 102 individual study definitions); and 5) adverse effects of corticosteroids in donors and  
19  
20 103 recipients.  
21  
22  
23  
24

25  
26 104 **Search Strategy**

27  
28 105 With the assistance of a medical librarian we searched MEDLINE, EMBASE and  
29  
30 106 Cochrane Central from their inception to January 2015 (Appendix 1). We searched  
31  
32 107 conference proceedings from the *International Society of Organ Donation and*  
33  
34 108 *Procurement, American Transplant Congress, the Canadian Society of Transplantation,*  
35  
36 109 *the Society of Critical Care Medicine, and the Canadian Critical Care Forum* over five  
37  
38 110 years, as well as clinical trial registries, and we screened the reference lists of all  
39  
40 111 relevant articles.  
41  
42  
43

44 112 **Eligibility Review and Data Abstraction**

45  
46 113 Two reviewers independently screened citations and evaluated the full text of  
47  
48 114 potentially eligible studies in duplicate, then abstracted data onto customized, pre-tested  
49  
50 115 forms. Disagreements between reviewers were resolved through discussion or third  
51  
52 116 party adjudication.  
53  
54  
55  
56  
57  
58  
59  
60

1  
2  
3 117 **Assessment of Risk of Bias (single studies) and Quality of Evidence (entire body**  
4  
5 118 **of evidence)**

6  
7  
8 119 For each study two reviewers evaluated the risk of bias using the Cochrane  
9  
10 120 Collaboration tool for RCTs. (18) This tool evaluates treatment allocation, sequence  
11  
12 121 generation and concealment, blinding, completeness of follow-up, selective outcome  
13  
14 122 reporting and other potential sources of bias.

15  
16  
17 123 For each outcome, using GRADE methodology, we evaluated the quality of the entire  
18  
19 124 body of evidence as high, moderate, low or very low, (17) The GRADE system considers  
20  
21 125 each of the following: overall risk of bias, (19) imprecision in estimates of effect, (20)  
22  
23 126 inconsistency in findings across studies, (21) indirectness (the extent to which individual  
24  
25 127 study populations, interventions, and outcome measurements deviate from those of  
26  
27 128 interest to this review) (22) and publication bias. (23)

28  
29  
30  
31 129 **Statistical Analyses**

32  
33 130 We calculated chance-corrected agreement for eligibility decisions using the kappa  
34  
35 131 statistic. (18) Dichotomous outcomes are reported as relative risks (RR) with their  
36  
37 132 respective 95% confidence interval (CI) for a two-sided comparison. For pooled  
38  
39 133 analyses, using Revman software version 5.2 (Copenhagen), we chose a fixed effect  
40  
41 134 rather than a random effect model because estimates of between-study variability are  
42  
43 135 necessary for random effects estimates and are uncertain when, as in this context, there  
44  
45 136 are few studies. (18) If graft outcomes were measured at more than one interval we  
46  
47 137 used the shortest one, assuming that steroid effects, if any, would manifest early.  
48  
49 138 Heterogeneity was measured using the Cochrane  $I^2$  statistic. There were too few studies  
50  
51 139 to address publication bias. (18)  
52  
53  
54  
55  
56  
57  
58  
59  
60

1  
2  
3 1404  
5 141 **RESULTS**6  
7 142 **Study selection**8  
9  
10 143 From 3500 citations, 11 were eligible (Figure 1). (24-34) Between-reviewer  
11  
12 144 agreement at the level of full text review was perfect ( $\kappa = 1$ ). Ten studies were  
13  
14 145 published in English (24, 25, 27-34) and one in French. (26)16  
17 146  
18 147 **Fig 1. Flow Diagram**19 148  
20 149  
21 150 **Study characteristics**22  
23  
24 151 Five out of 11 studies explicitly mentioned Ethics Review Board approval, and fewer  
25  
26 152 detailed the approach to research consent. (25, 27-29, 34) Four publications with a  
27  
28 153 focus on recipient outcomes reported separately for different organs from the same  
29  
30 154 donors. Specifically, one trial was reported in two distinct publications addressing  
31  
32 155 outcome related to the kidney (28) and to the liver respectively. (32) A second trial of a  
33  
34 156 single donor cohort reported separately on outcomes related to lung (37) and heart. (30)35  
36  
37 157 Four publications did not state the number of donors enrolled, because recipient  
38  
39 158 outcomes were the focus. (16, 30-33) When reported, the number of donors ranged from  
40  
41 159 40 to 269, and baseline characteristics were similar between study groups. (25, 27-29,  
42  
43 160 34) The mean donor age varied from 30 to 40 years. The most common cause for  
44  
45 161 neurological death was vascular injury (e.g. stroke, subarachnoid hemorrhage), followed  
46  
47 162 by traumatic brain injury. (25, 27, 34)48  
49  
50  
51 163 Participant in these studies also included transplant recipients in the eight trials  
52  
53 164 reporting on transplant outcomes, of whom there were 885 kidney recipients and 183  
54  
55 165 liver recipients. (24, 25, 28-33) Their baseline characteristics were reported in only three



1  
2  
3 166 publications. (25, 28, 29) Groups were similar and liver recipients had favourable  
4  
5 167 prognosis at baseline with a mean Model For End-Stage Liver Disease (MELD) score  
6  
7 168 between 14 and 16. (28, 29) Two studies measured graft outcome only among patients  
8  
9  
10 169 transplanted in the participating organ donation centre and excluded all recipients  
11  
12 170 transplanted in other facilities. (28, 30)

13  
14 171 Table 1 presents the study corticosteroid regimens. A single intravenous dose of  
15  
16 172 methylprednisolone was the most common regimen, ranging in dose from 1 gram to 5  
17  
18 173 grams. Three trials tested corticosteroid therapy in isolation; (25, 28, 29) two others  
19  
20 174 evaluated corticosteroids in a factorial design with liothyronine, (27, 34), one as part of  
21  
22 175 combined hormonal therapy with liothyronine (26) and five placebo-controlled trials  
23  
24 176 administered corticosteroids in combination with cyclophosphamide. (24, 30-33) The  
25  
26 177 timing of corticosteroid therapy also varied across studies. Corticosteroids were  
27  
28 178 administered 30 to 60 minutes after death declaration in one study, (26) immediately  
29  
30 179 after consent for organ donation in three studies, (27, 28, 34) and three to eight hours  
31  
32 180 before surgery in seven studies. (24, 25, 29-33) In most studies, methylprednisolone  
33  
34 181 was dosed every 24 hours. (24, 25, 27, 29-34)

182

183 **Table 1: Prospective Randomized Trials of Steroids Administration in Neurologically**  
 184 **Dead Donors- Summary of the Studies**

| Author, Year             | Donors/<br>Recipients<br>(n) | Organs<br>Recovered | Experimental<br>Intervention                                                                                           | Control<br>intervention |
|--------------------------|------------------------------|---------------------|------------------------------------------------------------------------------------------------------------------------|-------------------------|
| <b>Parallel Design</b>   |                              |                     |                                                                                                                        |                         |
| Chatterjee, 1977 (27)    | 50<br>84                     | Kidney              | MTP 5 g IV single dose after brain death confirmation                                                                  | Usual care              |
| Dienst, 1977 (34)        | NR<br>106                    | Kidney              | MTP 3 g IV + Cy 3 g IV single doses 5-8 hrs. before organ recovery                                                     | Usual care              |
|                          | NR<br>45                     |                     | MTP 5 g IV + Cy 3 g IV single doses 5-8 hrs. before organ recovery                                                     | Usual care              |
|                          | NR<br>29                     |                     | MTP 5 g IV + Cy 5 g IV single doses 5-8 hrs. before organ recovery                                                     | Placebo                 |
| Jeffery, 1978 (35)       | NR<br>52                     | Kidney              | MTP 5 g IV +Cy 7 g IV single doses $\geq$ 4 hrs. before organ recovery                                                 | Usual care              |
| Soulillou, 1979 (36)     | NR<br>62                     | Kidney              | MTP 5 g IV + Cy 5 g IV single doses $\geq$ 5 hrs. before organ recovery                                                | Placebo                 |
| Corry, 1980 (33)         | NR<br>52                     | Kidney              | MTP 60 mg/kg IV +Cy 80 mg/kg IV single doses $\geq$ 5 hrs. before organ recovery                                       | Usual care              |
| Mariot, 1980 (29)        | 40<br>NR                     | Multi-organs        | Hydrocortisone 100 mg IV+ T <sub>3</sub> 2 mcg IV after brain death confirmation q.30-60 min. until stable CVP and SBP | Placebo                 |
| Kotsch, 2008 (31)        | 100<br>100                   | Liver               | MTP 250 mg IV + 100 mg/h IV after brain death confirmation                                                             | Usual care              |
| Kainz, 2010 (28)         | 269<br>455                   | Kidney              | MTP 1 g single dose $\geq$ 3 hrs. before organ recovery                                                                | Placebo                 |
| Amatschek, 2012 (32)     | 90<br>83                     | Liver               | MTP 1 g single dose $\geq$ 3 hrs. before organ recovery                                                                | Placebo                 |
| <b>Factorial Design</b>  |                              |                     |                                                                                                                        |                         |
| Venkateswaran, 2008 (37) | 60<br>NR                     | Lung                | MTP 1 g IV single dose +/- T <sub>3</sub> 0.8 ug/kg +0.113 ug/kg/hr IV after brain death confirmation                  | Placebo                 |
| Venkateswaran, 2009 (30) | 80<br>NR                     | Heart               | MTP 1 g IV single dose +/- T <sub>3</sub> 0.8 ug/kg +0.113 ug/kg/hr IV after brain death confirmation                  | Placebo                 |

185 Legend : CVP= Central Venous Pressure, Cy = Cyclophosphamide, MTP = Methylprednisolone, NR = Not  
 186 Reported, SBP = Systolic Blood Pressure, T<sub>3</sub>= Liothyronin

## 187 Risk of bias of individual studies

188 Using the Cochrane tool, (18) four RCTs published after 1995 had low risk of  
189 bias. (25-29, 34) Earlier trials reported insufficient information to evaluate risk of bias  
190 (Figure 2). (24, 30-33)

191

## 192 Fig 2. Risk of Bias across the Included Studies

193

## 194 Results of individual studies and pooled results

### 195 Vasopressor requirement

196 The three studies (n = 452 donors) that reported on vasopressor administration  
197 most commonly used norepinephrine. (25, 28, 29) Individually and when pooled,  
198 corticosteroid did not influence the rate of vasopressor use in these studies (pooled RR  
199 0.96; 95% CI 0.89 to 1.05; moderate quality) (Figure 3). The GRADE quality of evidence  
200 was rated down to moderate quality primarily because this outcome was relatively  
201 susceptible to lack of blinding (Table 2).

202

## 203 Fig 3. The Effect of Corticosteroids on Vasopressor Requirement

204

### 205 Organ recovery

206 Four trials evaluated organ recovery rates, but these data were analysed and  
207 reported differently across the four trials. None of the individual trials reported results  
208 suggesting increased organ recovery with steroids. Two trials (n = 309 donors) reported  
209 on the number of donors that provided multiple organs, (25, 26) and the pooled estimate  
210 suggested no effect of corticosteroids but with a very wide confidence interval including

1  
2  
3 211 substantial benefit (RR 0.82; 95% CI 0.61 to 1.11; moderate quality) (Figure 4).  
4  
5 212 Similarly, in a factorial RCT, investigators did not demonstrate a significant increase in  
6  
7 213 the number of hearts recovered or suitable for transplantation. (27) In a *post hoc*  
8  
9 214 analysis, Venkateswaran observed a decrease in the extravascular lung water index  
10  
11 215 with the administration of corticosteroids; this could potentially increase the number of  
12  
13 216 lungs suitable for transplantation if taken into consideration during donor care. (34) For  
14  
15 217 this group of outcomes, we rated down the quality of evidence to moderate because of  
16  
17 218 imprecision (wide confidence intervals) (Table 2).  
18  
19  
20  
21  
22  
23  
24  
25  
26  
27  
28  
29  
30  
31  
32  
33  
34  
35  
36  
37  
38  
39  
40  
41  
42  
43  
44  
45  
46  
47  
48  
49  
50  
51  
52  
53  
54  
55  
56  
57  
58  
59  
60

219 Table 2: GRADE Profile

| Quality assessment             |              |                      |                      |                          |                      |                      | No of patients  |                 | Effect                        |                                                | Quality      |
|--------------------------------|--------------|----------------------|----------------------|--------------------------|----------------------|----------------------|-----------------|-----------------|-------------------------------|------------------------------------------------|--------------|
| No of studies                  | Study design | Risk of bias         | Inconsistency        | Indirectness             | Imprecision          | Other considerations | Steroid         | Placebo         | Relative (95% CI)             | Absolute (95% CI)                              |              |
| <b>Vasopressor Requirement</b> |              |                      |                      |                          |                      |                      |                 |                 |                               |                                                |              |
| 3                              | RCT          | serious <sup>a</sup> | not serious          | not serious              | not serious          | none                 | 156/227 (68.7%) | 160/225 (71.1%) | <b>RR 0.96</b> (0.89 to 1.05) | 28 fewer per 1000 (from 36 more to 78 fewer)   | ⊕⊕⊕ MODERATE |
| <b>Organ Recovery</b>          |              |                      |                      |                          |                      |                      |                 |                 |                               |                                                |              |
| 2                              | RCT          | not serious          | not serious          | not serious              | serious <sup>b</sup> | none                 | 46/156 (29.5%)  | 55/153 (35.9%)  | <b>RR 0.82</b> (0.61 to 1.11) | 65 fewer per 1000 (from 40 more to 140 fewer)  | ⊕⊕⊕ MODERATE |
| <b>Acute Graft Rejection</b>   |              |                      |                      |                          |                      |                      |                 |                 |                               |                                                |              |
| 3                              | RCT          | not serious          | serious <sup>c</sup> | not serious              | serious <sup>b</sup> | none                 | 29/114 (25.4%)  | 34/122 (27.9%)  | <b>RR 0.91</b> (0.60 to 1.39) | 25 fewer per 1000 (from 109 more to 111 fewer) | ⊕⊕ LOW       |
| <b>Graft Dysfunction</b>       |              |                      |                      |                          |                      |                      |                 |                 |                               |                                                |              |
| 8                              | RCT          | serious <sup>d</sup> | not serious          | serious <sup>e,f,g</sup> | not serious          | none                 | 113/500 (22.6%) | 148/569 (26.0%) | <b>RR 1.01</b> (0.83 to 1.24) | 3 more per 1000 (from 44 fewer to 62 more)     | ⊕⊕ LOW       |

220 RCT= Randomized Clinical Trial, RR= Relative Risk

221 a =Lack of blinding, b = Wide confidence interval suggesting appreciable harm or benefit, c = Large variation in effect, I2 large, d = Selection bias.

222 e = Different definition of the same outcome, f = Surrogate outcomes used to describe graft function, g = Co intervention.

1  
2  
3 **223 Figure 4: The Effect of Corticosteroids on Successful Donation of More Than One Organ**

4  
5 224

6  
7 225 Transplant outcomes (acute graft rejection and graft function)

8  
9 226 Three trials (n = 236 recipients) studied acute graft rejection. (28, 29, 32) Trials on  
10 227 acute liver rejection reported conflicting results. (28, 29) Amatschek et al. reported  
11  
12 228 similar risks of acute rejection as measured from routine biopsy specimens at three  
13  
14  
15  
16 229 months. (29) However, Kotsch et al. obtained a lower rate of acute rejection, in the  
17  
18 230 corticosteroid group, on routine biopsies within the first six months. (28) Jeffery et al. did  
19  
20 231 not find a reduction in the number of acute kidney rejection with corticosteroids within  
21  
22 232 the first year. (32) Episodes of rejection were diagnosed on the basis of an increase in  
23  
24 233 serum creatinine of more than 0.2 mg/100ml, clinical findings and absence of alternative  
25  
26 234 diagnosis explaining worsening renal function. Pooled estimates do not suggest that  
27  
28 235 corticosteroids reduce the risk of acute graft rejection (RR 0.91; 95% CI 0.60 to 1.39;  
29  
30 236 low confidence) (Figure 5). For this group of outcomes, we rated down the overall quality  
31  
32 237 of evidence to low because of inconsistency (large variation in effect between studies)  
33  
34 238 and imprecision (Table 2).

35  
36  
37  
38  
39 **239 Figure 5: The Effect of Corticosteroids on Acute Graft Rejection at Three Months**

40  
41 240  
42  
43  
44 241 Of the eight RCTs (n = 1069 recipients) that evaluated graft outcomes, (24, 25,  
45  
46 242 28-33) two trials provided conflicting results on liver graft function. Kotsch et al. reported  
47  
48 243 a reduction in transaminase levels within the ten days after transplantation among  
49  
50 244 patients receiving corticosteroid therapy. (28) In contrast, Amatschek et al. obtained  
51  
52 245 similar transaminase levels within seven days. (29) Six studies compared a composite  
53  
54 246 risk of one or more of the following data: creatinine level, creatinine clearance, dialysis,  
55  
56  
57  
58  
59  
60

1  
2  
3 247 listed for kidney transplantation or death at different time interval. (24, 25, 30-33) Pooled  
4  
5 248 estimates, suggest no effect of corticosteroids on graft function (RR 1.01; 95% CI 0.83  
6  
7 249 to 1.24; low confidence) (Figure 6). Individual studies had high risk of bias, (lack of  
8  
9  
10 250 blinding and loss to follow up) and also provided only indirect evidence because they  
11  
12 251 combined steroids with cyclophosphamide in the experimental groups. Therefore, we  
13  
14 252 rated the quality of evidence for this outcome as low (Table 2).  
15  
16  
17 253

### 19 254 **Figure 6: Forest Plot of the Effect of Corticosteroids on Graft Dysfunction**

21 255

#### 23 256 **Adverse effects**

25 257 Only two studies evaluated steroid-related adverse events. Investigators reported  
26  
27  
28 258 no effect on infection rates among donors. (28) Bile duct complications and hepatitis C  
29  
30 259 virus reinfection following liver transplantation were similar between groups. (28, 29)  
31  
32  
33 260

#### 35 261 **DISCUSSION**

37 262 We systematically reviewed 11 RCTs evaluating the efficacy of corticosteroid  
38  
39  
40 263 therapy in potential organ donors with respect to clinically important outcomes among  
41  
42 264 both donors and recipients. Individual studies applied a variety of dosing strategies and  
43  
44 265 study outcomes, and very few suggested any difference between corticosteroid and  
45  
46 266 control groups. When two or more studies measured the same outcome, pooled results  
47  
48  
49 267 did not support a treatment effect for hemodynamic stability, the number of organs  
50  
51 268 recovered, or transplant function. The overall quality of evidence was moderate or low  
52  
53 269 for these outcomes, limiting our confidence in the results.  
54  
55  
56  
57  
58  
59  
60

1  
2  
3 270 Strengths of our study include a comprehensive search, independent duplicate  
4  
5 271 assessments of study eligibility, risk of bias, and data abstraction, and the pooling of  
6  
7 272 results across studies where possible. Most importantly, we applied the GRADE system  
8  
9  
10 273 to rate the quality of evidence for each outcome that was addressed by more than one  
11  
12 274 study. In doing so, our goal was to support guidelines for clinical care and to highlight  
13  
14 275 areas for improving scientific rigor in this field. A primary limitation of this review was the  
15  
16  
17 276 inability to address differences in effect with different dosing regimens, or between organ  
18  
19 277 types, based on the small number of studies to support such subgroup analyses.

20  
21 278 Applying GRADE methodology, the overall quality of evidence was downgraded  
22  
23  
24 279 as a result of the risk of bias, indirectness of evidence, inconsistency and imprecision.  
25  
26 280 While the risk of bias among five studies reported in the past 20 years was relatively  
27  
28 281 low, the risk of bias was uncertain for six earlier studies, and may be high. (35) Risk of  
29  
30  
31 282 bias was related to lack of blinding and possible selection bias in the unexplained post-  
32  
33 283 randomization exclusion of specific transplant recipients from some studies. (28, 30)  
34  
35 284 Indirectness of evidence was another important reason for rating down the overall  
36  
37 285 quality of evidence. There were two types of indirectness. Five studies combining all  
38  
39 286 steroid interventions (but not control interventions) with other hormone therapies (1), or  
40  
41  
42 287 with cyclophosphamide (4), provide only indirect evidence of the potential treatment  
43  
44 288 effects of corticosteroids alone. Indirectness also comes into play when evaluating  
45  
46  
47 289 studies of varied dosing regimens; it is conceivable that the apparent lack of effect  
48  
49 290 overall is a result of assessing relatively helpful regimens alongside of those that are  
50  
51 291 relatively harmful.

52  
53 292 Finally, we also rated down the quality of evidence for two outcomes on the basis  
54  
55  
56 293 of imprecision. The small number of studies, patients within studies, and events among  
57  
58  
59  
60



1  
2  
3 294 patients resulted not only in wide confidence intervals but also precluded subgroup  
4  
5 295 analyses and assessment for publication bias. In summary, because the quality of  
6  
7 296 evidence is low for at least two outcomes, this review cannot support strong  
8  
9  
10 297 recommendations for clinical care.

11  
12 298 Inferences from this systematic review are also limited by varied outcomes of  
13  
14 299 graft dysfunction, varied definitions for each specific term, and the inability to apply  
15  
16 300 outcome definitions across organ groups, which is important in this field because one  
17  
18 301 organ donor may donate kidneys, liver, lung, heart, and/or pancreas or small bowel.  
19  
20 302 For example, outcomes of renal graft function across studies included graft failure, (24,  
21  
22 303 33) graft survival, (30, 31) and delayed graft function. (25) Even the measurement of  
23  
24 304 renal 'graft failure' was problematic for pooling across studies: Chatterjee et al. defined  
25  
26 305 graft failure as a composite outcome of kidney removal after transplantation, return to  
27  
28 306 hemodialysis or death, (24) while Souillou et al. defined graft failure as any requirement  
29  
30 307 for hemodialysis or a serum creatinine level (threshold not specified) after  
31  
32 308 transplantation. (33) Unified outcome measures for specific organs, and potentially  
33  
34 309 generic outcome measures across organ groups, would help to advance the science of  
35  
36 310 organ donor management.

37  
38 311 Our results are similar to those previously reported. (16, 36) However, we went  
39  
40 312 beyond prior reviews in conducting meta-analyses and using the GRADE approach for  
41  
42 313 rating the quality of evidence. Unfortunately, the moderate or low quality of evidence  
43  
44 314 does not allow strong inferences about the use of steroids in these populations. (15, 37)  
45  
46 315 Although observational studies frequently overestimate treatment effects, and these  
47  
48 316 might have been confounded by surgical interventions, organ preservation techniques  
49  
50 317 and transplant recipient characteristics, evidence from the current RCTs is also limited in  
51  
52  
53  
54  
55  
56  
57  
58  
59  
60

1  
2  
3 318 quality. In a recent European multicentre observational study (n = 259), administration  
4  
5 319 of corticosteroids to deceased organ donors with a neurological determination of death  
6  
7 320 was associated with a lower dose of norepinephrine (steroid group [SG] = 1.18 +/- 0.92  
8  
9 321 mg/h vs control group [CG] = 1.49 +/- 1.29 mg/h, p = 0.03) and shorter duration of  
10  
11 322 vasopressor support (SG = 874 min vs CG = 1160 min., p < 0.0001). (38) The incidence  
12  
13 323 of delayed graft function among recipients was similar between the two groups (SG =  
14  
15 324 30.8% vs CG = 26.6%, p=0.14). These findings are consistent with expected effects  
16  
17 325 regarding the impact of corticosteroid therapy in potential organ donors.  
18  
19  
20

21 326 This systematic review highlights three challenges of research addressing the  
22  
23 327 medical management of deceased organ donors: the scarcity of donors, practical  
24  
25 328 challenges of studying therapeutic interventions and subsequent outcomes among very  
26  
27 329 separate study populations, (i.e., organ donors and transplant recipients), and the  
28  
29 330 complexity of definitions of graft function. These challenges will only be met through  
30  
31 331 research collaborations, recruiting all eligible patients into clinical trials, and possibly  
32  
33 332 with models of consent that are adapted to the reality of organ donation.  
34  
35  
36  
37

38 333  
39  
40 334 **CONCLUSION**  
41  
42 335 Current clinical trials do not identify benefits of corticosteroid therapy for deceased organ  
43  
44 336 donors or their transplant recipients. The quality of this evidence is insufficient, however,  
45  
46 337 to rule out the possibility of important benefits with respect to donation rates or  
47  
48 338 transplant outcomes for any organ. In light of the lack of any signal for harm, there is no  
49  
50 339 imperative to modify current recommendations for clinical care, based on observational  
51  
52 340 studies, to consider corticosteroid therapy in the management of organ donors.  
53  
54  
55

56 341  
57  
58  
59  
60

1  
2  
3 342 All authors have made material contributions to this manuscript according to the rules of  
4  
5 343 authorship of ICMJE. Specifically, here are the contributions of each author:

6  
7 344 F D'Aragon: Conception of the design, acquisition of data, analysis and interpretation of  
8  
9 345 the data, draft and revised the manuscript, approved the final version to be published;

10  
11 346 E Belley Cote: Conception of the design, acquisition of data, analysis and interpretation  
12  
13 347 of the data, draft and revised the manuscript and approved final version to be published;

14  
15 348 A Argawal: Conception of the design, acquisition and analysis of the data, draft and  
16  
17 349 revised the manuscript, approved final version to be published;

18  
19 350 AJ Frenette: Conception of the design, acquisition and analysis of the data, draft and  
20  
21 351 revised manuscript and approved the final version to be published;

22  
23 352 F Lamontagne: Conception of the design, acquisition and analysis of the data, draft and  
24  
25 353 revised manuscript and approved the final version to be published;

26  
27 354 G Guyatt: Conception of the design, acquisition and analysis of the data, draft and  
28  
29 355 revised the manuscript and approved the final version to be published;

30  
31 356 S Dhanani: Conception of the design, acquisition and analysis of the data, draft and  
32  
33 357 revised the manuscript and approved the final version to be published;

34  
35 358 M Meade: Conception of the design, data acquisition and analysis, draft and revised the  
36  
37 359 manuscript and approved the final version to be published.

38  
39 360 All authors report no competing interest.

40  
41 361 No funding was obtained for the completion of this work.

42  
43 362 There isn't any additional data from this work.  
44  
45  
46  
47  
48  
49  
50  
51  
52  
53  
54  
55  
56  
57  
58  
59  
60

**REFERENCES**

1. Deceased Organ Donor Potential in Canada [Internet]. 2014.
2. Rosendale JD, Chabalewski FL, McBride MA, et al. Increased transplanted organs from the use of a standardized donor management protocol. *Am J Transplant*. 2002 Sep;2(8):761-8. PubMed PMID: 12243497. Epub 2002/09/24. eng.
3. Dhanani S, Shemie SD. Advancing the science of organ donor management. *Critical care*. 2014;18(6):612. PubMed PMID: 25672523. Pubmed Central PMCID: PMC4331331. Epub 2015/02/13. eng.
4. Shemie SD. Resuscitation and stabilization of the critically ill child. 1st ed2009.
5. Cooper DK, Novitzky D, Wicomb WN, et al. A review of studies relating to thyroid hormone therapy in brain-dead organ donors. *Frontiers in bioscience* (Landmark edition). 2009;14:3750-70. PubMed PMID: 19273308. Epub 2009/03/11. eng.
6. Dimopoulou I, Tsagarakis S, Anthi A, et al. High prevalence of decreased cortisol reserve in brain-dead potential organ donors. *Critical care medicine*. 2003 Apr;31(4):1113-7. PubMed PMID: 12682481. Epub 2003/04/19. eng.
7. Gramm HJ, Meinhold H, Bickel U, et al. Acute endocrine failure after brain death? *Transplantation*. 1992 Nov;54(5):851-7. PubMed PMID: 1332223. Epub 1992/11/01. eng.
8. Howlett TA, Keogh AM, Perry L, et al. Anterior and posterior pituitary function in brain-stem-dead donors. A possible role for hormonal replacement therapy. *Transplantation*. 1989 May;47(5):828-34. PubMed PMID: 2718243. Epub 1989/05/01. eng.
9. Nicolas-Robin A, Barouk JD, Darnal E, et al. Free cortisol and accuracy of total cortisol measurements in the diagnosis of adrenal insufficiency in brain-dead patients. *Anesthesiology*. 2011 Sep;115(3):568-74. PubMed PMID: 21795963. Epub 2011/07/29. eng.
10. Barklin A. Systemic inflammation in the brain-dead organ donor. *Acta anaesthesiologica Scandinavica*. 2009 Apr;53(4):425-35. PubMed PMID: 19226294. Epub 2009/02/20. eng.
11. Smith M. Physiologic changes during brain stem death—lessons for management of the organ donor. *J Heart Lung Transplant*. 2004 Sep;23(9 Suppl):S217-22. PubMed PMID: 15381167. Epub 2004/09/24. eng.
12. Murugan R, Venkataraman R, Wahed AS, et al. Preload responsiveness is associated with increased interleukin-6 and lower organ yield from brain-dead donors. *Critical care medicine*. 2009 Aug;37(8):2387-93. PubMed PMID: 19531941. Pubmed Central PMCID: PMC2864555. Epub 2009/06/18. eng.
13. Birks EJ, Owen VJ, Burton PB, et al. Tumor necrosis factor-alpha is expressed in donor heart and predicts right ventricular failure after human heart transplantation. *Circulation*. 2000 Jul 18;102(3):326-31. PubMed PMID: 10899097. Epub 2000/07/19. eng.
14. Lopau K, Mark J, Schramm L, et al. Hormonal changes in brain death and immune activation in the donor. *Transpl Int*. 2000;13 Suppl 1:S282-5. PubMed PMID: 11112013. Epub 2000/12/09. eng.
15. Kotloff RM, Blosser S, Fulda GJ, et al. Management of the Potential Organ Donor in the ICU: Society of Critical Care Medicine/American College of Chest Physicians/Association of Organ Procurement Organizations Consensus Statement.

- 1  
2  
3 409 *Critical care medicine*. 2015 Jun;43(6):1291-325. PubMed PMID: 25978154. Epub  
4 410 2015/05/16. eng.
- 5 411 16. Dupuis S, Amiel JA, Desgroseilliers M, et al. Corticosteroids in the management  
6 412 of brain-dead potential organ donors: a systematic review. *Br J Anaesth*. 2014  
7 413 Sep;113(3):346-59. PubMed PMID: 24980425. Epub 2014/07/02. eng.
- 8 414 17. Guyatt GH, Oxman AD, Vist GE, et al. GRADE: an emerging consensus on rating  
9 415 quality of evidence and strength of recommendations. *BMJ*. 2008 Apr 26;336(7650):924-  
10 416 6. PubMed PMID: 18436948. Pubmed Central PMCID: 2335261. Epub 2008/04/26. eng.
- 11 417 18. Higgins Julian PT GS. Cochrane Handbook for Systematic Reviews of  
12 418 Interventions <http://handbook.cochrane.org/>; *Cochrane Collaboration*; 2011.
- 13 419 19. Guyatt GH, Oxman AD, Vist G, et al. GRADE guidelines: 4. Rating the quality of  
14 420 evidence—study limitations (risk of bias). *J Clin Epidemiol*. 2011 Apr;64(4):407-15.  
15 421 PubMed PMID: 21247734. Epub 2011/01/21. eng.
- 16 422 20. Guyatt GH, Oxman AD, Kunz R, et al. GRADE guidelines 6. Rating the quality of  
17 423 evidence—imprecision. *J Clin Epidemiol*. 2011 Dec;64(12):1283-93. PubMed PMID:  
18 424 21839614. Epub 2011/08/16. eng.
- 19 425 21. Guyatt GH, Oxman AD, Kunz R, et al. GRADE guidelines: 7. Rating the quality of  
20 426 evidence—inconsistency. *J Clin Epidemiol*. 2011 Dec;64(12):1294-302. PubMed PMID:  
21 427 21803546. Epub 2011/08/02. eng.
- 22 428 22. Guyatt GH, Oxman AD, Kunz R, et al. GRADE guidelines: 8. Rating the quality of  
23 429 evidence—indirectness. *Journal of clinical epidemiology*. 2011 Dec;64(12):1303-10.  
24 430 PubMed PMID: 21802903. Epub 2011/08/02.
- 25 431 23. Guyatt GH, Oxman AD, Montori V, et al. GRADE guidelines: 5. Rating the quality  
26 432 of evidence—publication bias. *J Clin Epidemiol*. 2011 Dec;64(12):1277-82. PubMed  
27 433 PMID: 21802904. Epub 2011/08/02. eng.
- 28 434 24. Chatterjee SN, Terasaki PI, Fine S, et al. Pretreatment of cadaver donors with  
29 435 methylprednisolone in human renal allografts. *Surg Gynecol Obstet*. 1977  
30 436 Nov;145(5):729-32. PubMed PMID: 333644. Epub 1977/11/01. eng.
- 31 437 25. Kainz A, Wilflingseder J, Mitterbauer C, et al. Steroid pretreatment of organ  
32 438 donors to prevent postischemic renal allograft failure: a randomized, controlled trial. *Ann*  
33 439 *Intern Med*. 2010 Aug 17;153(4):222-30. PubMed PMID: 20713790. Epub 2010/08/18.  
34 440 eng.
- 35 441 26. Mariot J, Jacob F, Voltz C, et al. [Value of hormonal treatment with  
36 442 triiodothyronine and cortisone in brain dead patients]. *Ann Fr Anesth Reanim*.  
37 443 1991;10(4):321-8. PubMed PMID: 1928853. Epub 1991/01/01. Interet de  
38 444 l'hormonotherapie associant triiodothyronine et cortisone chez le patient en etat de mort  
39 445 cerebrale. fre.
- 40 446 27. Venkateswaran RV, Steeds RP, Quinn DW, et al. The haemodynamic effects of  
41 447 adjunctive hormone therapy in potential heart donors: a prospective randomized double-  
42 448 blind factorially designed controlled trial. *Eur Heart J*. 2009 Jul;30(14):1771-80. PubMed  
43 449 PMID: 19324916. Epub 2009/03/28. eng.
- 44 450 28. Kotsch K, Ulrich F, Reutzel-Selke A, et al. Methylprednisolone therapy in  
45 451 deceased donors reduces inflammation in the donor liver and improves outcome after  
46 452 liver transplantation: a prospective randomized controlled trial. *Ann Surg*. 2008  
47 453 Dec;248(6):1042-50. PubMed PMID: 19092349. Epub 2008/12/19. eng.
- 48 454 29. Amatschek S, Wilflingseder J, Pones M, al. The effect of steroid pretreatment of  
49 455 deceased organ donors on liver allograft function: a blinded randomized placebo-

- 1  
2  
3 456 controlled trial. *J Hepatol*. 2012 Jun;56(6):1305-9. PubMed PMID: 22326464. Pubmed  
4 457 Central PMCID: PMC3355301. Epub 2012/02/14. eng.
- 5 458 30. Corry RJ, Patel NP, West JC, et al. Pretreatment of cadaver donors with  
6 459 cyclophosphamide and methylprednisolone: effect on renal transplant outcome.  
7 460 *Transplant Proc*. 1980 Jun;12(2):348-51. PubMed PMID: 6994305. Epub 1980/06/01.  
8 461 eng.
- 9 462 31. Dienst SG. Statewide donor pretreatment study. *Transplant Proc*. 1977  
10 463 Sep;9(3):1597-9. PubMed PMID: 331595. Epub 1977/09/01. eng.
- 11 464 32. Jeffery JR, Downs A, Grahame JW, et al. A randomized prospective study of  
12 465 cadaver donor pretreatment in renal transplantation. *Transplantation*. 1978  
13 466 Jun;25(6):287-9. PubMed PMID: 351886. Epub 1978/06/01. eng.
- 14 467 33. Souillou JP, Baron D, Rouxel A, et al. Steroid-cyclophosphamide pretreatment of  
15 468 kidney allograft donors. A control study. *Nephron*. 1979;24(4):193-7. PubMed PMID:  
16 469 386157. Epub 1979/01/01. eng.
- 17 470 34. Venkateswaran RV, Patchell VB, Wilson IC, et al. Early donor management  
18 471 increases the retrieval rate of lungs for transplantation. *Ann Thorac Surg*. 2008  
19 472 Jan;85(1):278-86; discussion 86. PubMed PMID: 18154823. Epub 2007/12/25. eng.
- 20 473 35. Akl EA, Sun X, Busse JW, et al. Specific instructions for estimating unclearly  
21 474 reported blinding status in randomized trials were reliable and valid. *Journal of clinical*  
22 475 *epidemiology*. 2012 Mar;65(3):262-7. PubMed PMID: 22200346. Epub 2011/12/28. eng.
- 23 476 36. Rech TH, Moraes RB, Crispim D, et al. Management of the brain-dead organ  
24 477 donor: a systematic review and meta-analysis. *Transplantation*. 2013 Apr 15;95(7):966-  
25 478 74. PubMed PMID: 23545508. Epub 2013/04/03. eng.
- 26 479 37. Shemie SD, Ross H, Pagliarello J, et al. Organ donor management in Canada:  
27 480 recommendations of the forum on Medical Management to Optimize Donor Organ  
28 481 Potential. *CMAJ*. 2006 Mar 14;174(6):S13-32. PubMed PMID: 16534070. Pubmed  
29 482 Central PMCID: PMC1402396. Epub 2006/03/15. eng.
- 30 483 38. Pinsard M, Ragot S, Mertes PM, et al. Interest of low-dose hydrocortisone  
31 484 therapy during brain-dead organ donor resuscitation: the CORTICOME study. *Critical*  
32 485 *care* (London, England). 2014;18(4):R158. PubMed PMID: 25056510. Pubmed Central  
33 486 PMCID: PMC4220083. Epub 2014/07/25. eng.
- 34  
35  
36  
37  
38  
39  
40  
41  
42  
43  
44  
45  
46  
47  
48  
49  
50  
51  
52  
53  
54  
55  
56  
57  
58  
59  
60

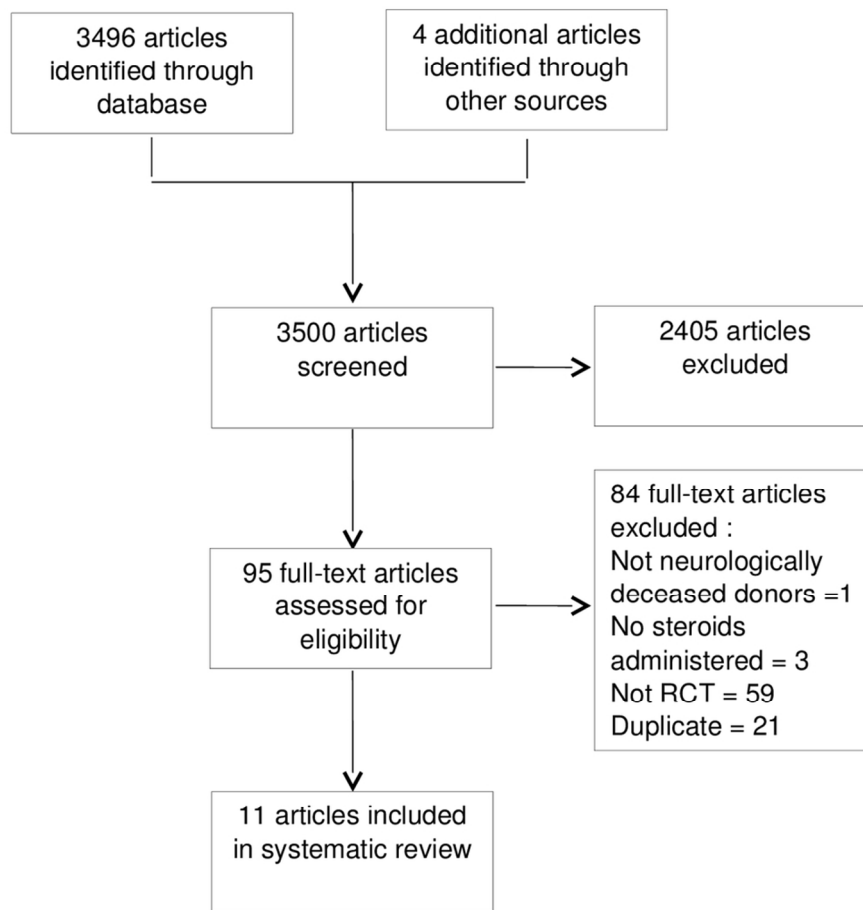

97x92mm (300 x 300 DPI)

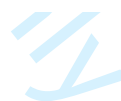

|                    | Random sequence generation (selection bias) | Allocation concealment (selection bias) | Blinding of participants and personnel (performance bias) | Blinding of outcome assessment (detection bias) | Incomplete outcome data (attrition bias) | Selective reporting (reporting bias) | Other bias |
|--------------------|---------------------------------------------|-----------------------------------------|-----------------------------------------------------------|-------------------------------------------------|------------------------------------------|--------------------------------------|------------|
| Amatschek 2012     | +                                           | +                                       | +                                                         | ?                                               | +                                        | +                                    | +          |
| Chatterjee 1977    | +                                           | +                                       | -                                                         | ?                                               | -                                        | +                                    | -          |
| Corry 1980         | -                                           | ?                                       | -                                                         | ?                                               | -                                        | +                                    | -          |
| Dienst 1977        | -                                           | ?                                       | -                                                         | ?                                               | -                                        | +                                    | -          |
| Jeffery 1978       | +                                           | ?                                       | -                                                         | ?                                               | -                                        | ?                                    | -          |
| Kainz 2010         | +                                           | +                                       | +                                                         | ?                                               | +                                        | +                                    | +          |
| Kotsch 2008        | ?                                           | ?                                       | -                                                         | +                                               | +                                        | ?                                    | +          |
| Mariot 1991        | +                                           | ?                                       | +                                                         | ?                                               | +                                        | ?                                    | ?          |
| Soulillou 1979     | -                                           | ?                                       | +                                                         | ?                                               | -                                        | +                                    | -          |
| Venkateswaran 2008 | +                                           | +                                       | +                                                         | ?                                               | +                                        | -                                    | -          |
| Venkateswaran 2009 | +                                           | +                                       | +                                                         | ?                                               | +                                        | +                                    | -          |

270x349mm (300 x 300 DPI)



1  
2  
3  
4  
5  
6  
7  
8  
9  
10  
11  
12  
13  
14  
15  
16  
17  
18  
19  
20  
21  
22  
23  
24  
25  
26  
27  
28  
29  
30  
31  
32  
33  
34  
35  
36  
37  
38  
39  
40  
41  
42  
43  
44  
45  
46  
47  
48  
49  
50  
51  
52  
53  
54  
55  
56  
57  
58  
59  
60

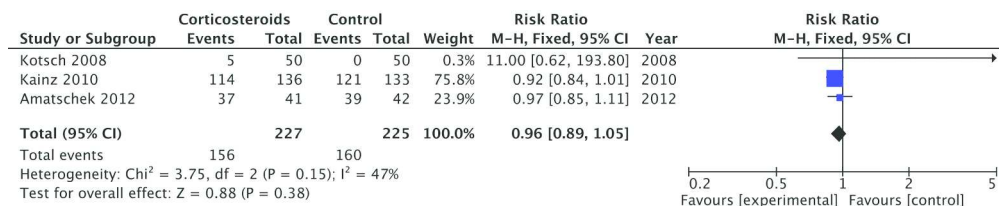

195x40mm (300 x 300 DPI)

For peer review only

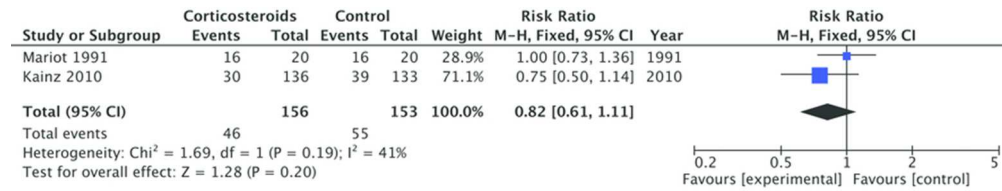

37x7mm (600 x 600 DPI)

For peer review only

1  
2  
3  
4  
5  
6  
7  
8  
9  
10  
11  
12  
13  
14  
15  
16  
17  
18  
19  
20  
21  
22  
23  
24  
25  
26  
27  
28  
29  
30  
31  
32  
33  
34  
35  
36  
37  
38  
39  
40  
41  
42  
43  
44  
45  
46  
47  
48  
49  
50  
51  
52  
53  
54  
55  
56  
57  
58  
59  
60

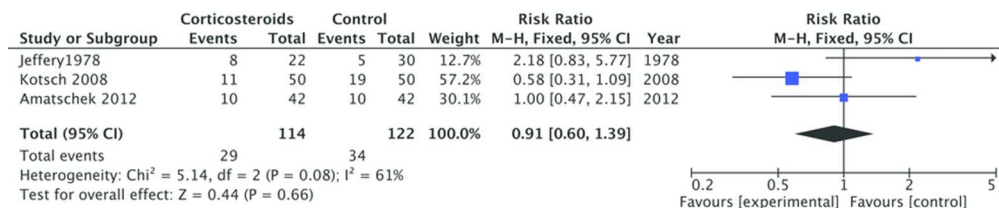

41x8mm (600 x 600 DPI)

For peer review only

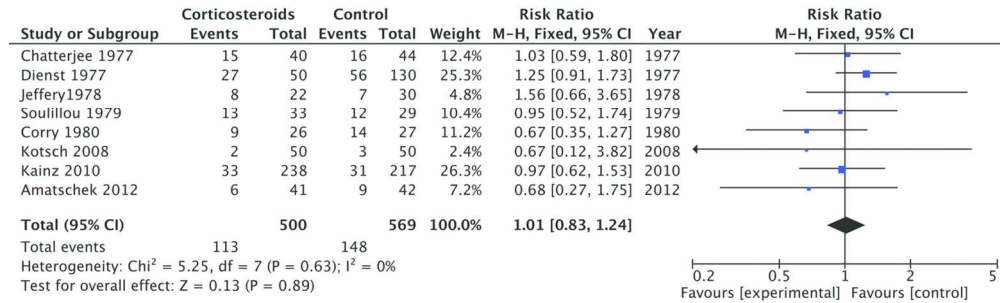

59x18mm (600 x 600 DPI)

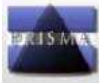

# PRISMA 2009 Checklist

| Section/topic                      | #  | Checklist item                                                                                                                                                                                                                                                                                              | Reported on page # |
|------------------------------------|----|-------------------------------------------------------------------------------------------------------------------------------------------------------------------------------------------------------------------------------------------------------------------------------------------------------------|--------------------|
| <b>TITLE</b>                       |    |                                                                                                                                                                                                                                                                                                             |                    |
| Title                              | 1  | Identify the report as a systematic review, meta-analysis, or both.                                                                                                                                                                                                                                         | 1                  |
| <b>ABSTRACT</b>                    |    |                                                                                                                                                                                                                                                                                                             |                    |
| Structured summary                 | 2  | Provide a structured summary including, as applicable: background; objectives; data sources; study eligibility criteria, participants, and interventions; study appraisal and synthesis methods; results; limitations; conclusions and implications of key findings; systematic review registration number. | 2                  |
| <b>INTRODUCTION</b>                |    |                                                                                                                                                                                                                                                                                                             |                    |
| Rationale                          | 3  | Describe the rationale for the review in the context of what is already known.                                                                                                                                                                                                                              | 3                  |
| Objectives                         | 4  | Provide an explicit statement of questions being addressed with reference to participants, interventions, comparisons, outcomes, and study design (PICOS).                                                                                                                                                  | 3                  |
| <b>METHODS</b>                     |    |                                                                                                                                                                                                                                                                                                             |                    |
| Protocol and registration          | 5  | Indicate if a review protocol exists, if and where it can be accessed (e.g., Web address), and, if available, provide registration information including registration number.                                                                                                                               | S2                 |
| Eligibility criteria               | 6  | Specify study characteristics (e.g., PICOS, length of follow-up) and report characteristics (e.g., years considered, language, publication status) used as criteria for eligibility, giving rationale.                                                                                                      | 4                  |
| Information sources                | 7  | Describe all information sources (e.g., databases with dates of coverage, contact with study authors to identify additional studies) in the search and date last searched.                                                                                                                                  | 4                  |
| Search                             | 8  | Present full electronic search strategy for at least one database, including any limits used, such that it could be repeated.                                                                                                                                                                               | S1                 |
| Study selection                    | 9  | State the process for selecting studies (i.e., screening, eligibility, included in systematic review, and, if applicable, included in the meta-analysis).                                                                                                                                                   | 5                  |
| Data collection process            | 10 | Describe method of data extraction from reports (e.g., piloted forms, independently, in duplicate) and any processes for obtaining and confirming data from investigators.                                                                                                                                  | 5                  |
| Data items                         | 11 | List and define all variables for which data were sought (e.g., PICOS, funding sources) and any assumptions and simplifications made.                                                                                                                                                                       | 5                  |
| Risk of bias in individual studies | 12 | Describe methods used for assessing risk of bias of individual studies (including specification of whether this was done at the study or outcome level), and how this information is to be used in any data synthesis.                                                                                      | 5                  |
| Summary measures                   | 13 | State the principal summary measures (e.g., risk ratio, difference in means).                                                                                                                                                                                                                               | 5                  |
| Synthesis of results               | 14 | Describe the methods of handling data and combining results of studies, if done, including measures of consistency (e.g., $I^2$ ) for each meta-analysis.                                                                                                                                                   | 5                  |

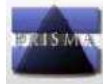

# PRISMA 2009 Checklist

Page 1 of 2

| Section/topic                 | #  | Checklist item                                                                                                                                                                                           | Reported on page # |
|-------------------------------|----|----------------------------------------------------------------------------------------------------------------------------------------------------------------------------------------------------------|--------------------|
| Risk of bias across studies   | 15 | Specify any assessment of risk of bias that may affect the cumulative evidence (e.g., publication bias, selective reporting within studies).                                                             | 5                  |
| Additional analyses           | 16 | Describe methods of additional analyses (e.g., sensitivity or subgroup analyses, meta-regression), if done, indicating which were pre-specified.                                                         | 5                  |
| <b>RESULTS</b>                |    |                                                                                                                                                                                                          |                    |
| Study selection               | 17 | Give numbers of studies screened, assessed for eligibility, and included in the review, with reasons for exclusions at each stage, ideally with a flow diagram.                                          | 6                  |
| Study characteristics         | 18 | For each study, present characteristics for which data were extracted (e.g., study size, PICOS, follow-up period) and provide the citations.                                                             | 6                  |
| Risk of bias within studies   | 19 | Present data on risk of bias of each study and, if available, any outcome level assessment (see item 12).                                                                                                | 7                  |
| Results of individual studies | 20 | For all outcomes considered (benefits or harms), present, for each study: (a) simple summary data for each intervention group (b) effect estimates and confidence intervals, ideally with a forest plot. | 8                  |
| Synthesis of results          | 21 | Present results of each meta-analysis done, including confidence intervals and measures of consistency.                                                                                                  | 8                  |
| Risk of bias across studies   | 22 | Present results of any assessment of risk of bias across studies (see Item 15).                                                                                                                          | 8                  |
| Additional analysis           | 23 | Give results of additional analyses, if done (e.g., sensitivity or subgroup analyses, meta-regression [see Item 16]).                                                                                    | NA                 |
| <b>DISCUSSION</b>             |    |                                                                                                                                                                                                          |                    |
| Summary of evidence           | 24 | Summarize the main findings including the strength of evidence for each main outcome; consider their relevance to key groups (e.g., healthcare providers, users, and policy makers).                     | 10                 |
| Limitations                   | 25 | Discuss limitations at study and outcome level (e.g., risk of bias), and at review-level (e.g., incomplete retrieval of identified research, reporting bias).                                            | 11                 |
| Conclusions                   | 26 | Provide a general interpretation of the results in the context of other evidence, and implications for future research.                                                                                  | 13                 |
| <b>FUNDING</b>                |    |                                                                                                                                                                                                          |                    |
| Funding                       | 27 | Describe sources of funding for the systematic review and other support (e.g., supply of data); role of funders for the systematic review.                                                               | 14                 |

From: Moher D, Liberati A, Tetzlaff J, Altman DG, The PRISMA Group (2009). Preferred Reporting Items for Systematic Reviews and Meta-Analyses: The PRISMA Statement. PLoS Med 6(7): e1000097. doi:10.1371/journal.pmed1000097

For more information, visit: [www.prisma-statement.org](http://www.prisma-statement.org).

Page 2 of 2

For peer review only - <http://bmjopen.bmj.com/site/about/guidelines.xhtml>

# BMJ Open

## Effect of Corticosteroid Administration on Neurologically Deceased Organ Donors and Transplant Recipients : A Systematic Review and Meta-Analysis

|                                 |                                                                                                                                                                                                                                                                                                                                                                                                                                                                                                                                                                                                                                                                                                                                                                                      |
|---------------------------------|--------------------------------------------------------------------------------------------------------------------------------------------------------------------------------------------------------------------------------------------------------------------------------------------------------------------------------------------------------------------------------------------------------------------------------------------------------------------------------------------------------------------------------------------------------------------------------------------------------------------------------------------------------------------------------------------------------------------------------------------------------------------------------------|
| Journal:                        | <i>BMJ Open</i>                                                                                                                                                                                                                                                                                                                                                                                                                                                                                                                                                                                                                                                                                                                                                                      |
| Manuscript ID                   | bmjopen-2016-014436.R1                                                                                                                                                                                                                                                                                                                                                                                                                                                                                                                                                                                                                                                                                                                                                               |
| Article Type:                   | Research                                                                                                                                                                                                                                                                                                                                                                                                                                                                                                                                                                                                                                                                                                                                                                             |
| Date Submitted by the Author:   | 16-Feb-2017                                                                                                                                                                                                                                                                                                                                                                                                                                                                                                                                                                                                                                                                                                                                                                          |
| Complete List of Authors:       | D'Aragon, Frédéric; Université de Sherbrooke Faculté de médecine et des sciences de la santé, Anesthesiology; Centre de recherche du CHUS, Belley-Côté, Émilie; McMaster University, Department of Health Research Methods, Evidence and Impact (HEI)<br>Agarwal, Arnav; McMaster University, Department of Health Research Methods, Evidence and Impact (HEI); University of Toronto Faculty of Medicine<br>Frenette, Anne-Julie; Université de Montréal<br>Lamontagne, François; Université de Sherbrooke<br>Guyatt, Gordon; McMaster University, Department of Health Research Methods, Evidence and Impact (HEI)<br>Dhanani, Sonny; University of Ottawa, Critical Care<br>Meade, Maureen; McMaster University, Department of Health Research Methods, Evidence and Impact (HEI) |
| <b>Primary Subject Heading</b>: | Intensive care                                                                                                                                                                                                                                                                                                                                                                                                                                                                                                                                                                                                                                                                                                                                                                       |
| Secondary Subject Heading:      | Surgery, Pharmacology and therapeutics                                                                                                                                                                                                                                                                                                                                                                                                                                                                                                                                                                                                                                                                                                                                               |
| Keywords:                       | INTENSIVE & CRITICAL CARE, tissue and organ procurement, TRANSPLANT MEDICINE, Graft rejection, Methylprednisolone, Brain death                                                                                                                                                                                                                                                                                                                                                                                                                                                                                                                                                                                                                                                       |
|                                 |                                                                                                                                                                                                                                                                                                                                                                                                                                                                                                                                                                                                                                                                                                                                                                                      |

SCHOLARONE™  
Manuscripts

1  
2  
3 **EFFECT OF CORTICOSTEROID ADMINISTRATION ON NEUROLOGICALLY**  
4  
5 **DECEASED ORGAN DONORS AND TRANSPLANT RECIPIENTS : A SYSTEMATIC**  
6  
7 **REVIEW AND META-ANALYSIS**  
8

9  
10 **My manuscript is submitted as an original works:**

11  
12 **Authors:**

13  
14 Frederick D'Aragnon, M.D.<sup>1,4</sup>; Emilie Belley-Cote, M.D.<sup>1</sup>; Arnav Agarwal, BSc<sup>1,2</sup>; Anne-  
15 Julie Frenette, MSc<sup>3</sup>; Francois Lamontagne, M.D., MSc<sup>4</sup>; Gordon Guyatt, M.D., MSc<sup>1,6</sup>;  
16  
17  
18  
19 Sonny Dhanani, M.D.<sup>5</sup>; Maureen O. Meade, M.D., MSc<sup>1,6</sup>  
20

21  
22 **Affiliations:**

23  
24 <sup>1</sup>Department of Clinical Epidemiology and Biostatistics, McMaster University, Hamilton,  
25  
26 Ontario, Canada

27  
28 <sup>2</sup>Faculty of Medicine, University of Toronto, Toronto, Ontario, Canada, L8S 4K1

29  
30 <sup>3</sup>University of Montreal, Faculty of Pharmacy ; Hopital Sacre Cœur de Montreal,  
31  
32 Montréal, Québec, Canada, H3C 3J7

33  
34  
35 <sup>4</sup>Centre de Recherche du Centre Hospitalier Universitaire de Sherbrooke et Faculté de  
36  
37 médecine et des sciences de la santé, □ Université de Sherbrooke, Sherbrooke, Québec,  
38  
39 Canada, J1H 5N4

40  
41  
42 <sup>5</sup>Critical Care, Children's Hospital of Eastern Ontario; Associate Professor, Department  
43  
44 of Medicine, University of Ottawa, K1H 8L1

45  
46  
47 <sup>6</sup>Departments of Medicine, McMaster University, Hamilton, Ontario, Canada, L8S 4K1  
48

49  
50 **Corresponding author:**

51  
52 Frederick D'Aragnon

53  
54 Faculty of Medicine & Health Sciences , University of Sherbrooke

55  
56 3001 12<sup>e</sup> ave North  
57  
58  
59  
60



1  
2  
3 Sherbrooke, Canada

4  
5 J1H 5N4

6  
7 frederick.daragon@usherbrooke.ca

8  
9  
10 819-346-1110 ext 13905

11  
12  
13 **Word Count** : 3025 words

14  
15  
16  
17  
18 **ABSTRACT**

19  
20 **Objectives** : This review investigates the impact of corticosteroids on donation rates  
21 and transplant outcomes in light of findings from randomized controlled trials (RCTs) and  
22 to highlight the sources of uncertainty in this unresolved donor management issue.  
23  
24  
25

26  
27  
28 **Data Sources** : We searched electronic databases, trial registries, and conference  
29 proceedings for RCTs evaluating corticosteroid therapy in neurologically deceased  
30 donors.  
31  
32  
33

34  
35  
36 **Study Selection & Data Extraction** : Independent reviewers assessed eligibility,  
37 evaluated risk of bias, and abstracted data, including donor hemodynamic data, number  
38 of organs recovered, and transplant outcomes. Where possible, we pooled results. For  
39 each outcome we assessed the overall quality of evidence using GRADE methodology.  
40  
41  
42  
43

44  
45 **Data Synthesis**: Eleven RCTs with different corticosteroid regimens were included.  
46 Most trials assessed a once-daily infusion of methylprednisolone. Aside from one study  
47 showing improved liver graft function, no individual study or pooled analysis showed  
48 benefit of corticosteroids for any outcome: vasopressor use (3 trials; relative risk [RR]  
49 0.96; 95% confidence interval [CI] 0.89 to 1.05), multiple organs recovered (2 trials; RR  
50  
51  
52  
53  
54  
55  
56  
57  
58  
59  
60

1  
2  
3 0.82; 95% CI 0.61 to 1.11), acute graft rejection (3 trials; RR 0.91; 95% CI 0.60 to 1.39)  
4  
5 or graft dysfunction (8 trials; RR 1.01; 95% CI 0.83 to 1.24). Two trials investigated  
6  
7 adverse effects and found similar rates between groups. Quality of evidence was  
8  
9 moderate or low for all outcomes.  
10

11  
12 **Conclusion :** Current clinical trials are limited in numbers and size to identify benefits  
13  
14 or harms of corticosteroid therapy for deceased organ donors. In the face of these  
15  
16 results, administering or withholding steroids both appear reasonable courses of action.  
17  
18  
19  
20  
21  
22

### 23 **STRENGTHS AND LIMITATIONS**

24  
25 An exhaustive search strategy and strict adherence to systematic review methodology  
26  
27 make this review the most rigorous on the topic.  
28

29  
30 Our comprehensive GRADE approach improves the transparency regarding the quality  
31  
32 of the available evidence on the effect of steroids in potential organ donors.  
33

34  
35 Available data only allows for limited inference on the effects of steroid on graft outcome  
36  
37 due to varied definitions of graft outcomes.  
38

39  
40 The clinical relevance of our results is limited by the inability to assess for differences in  
41  
42 steroid effects associated with variations in dose or timing of administration.  
43  
44  
45  
46  
47  
48  
49  
50  
51  
52  
53  
54  
55  
56  
57  
58  
59  
60

## INTRODUCTION

For patients with end-stage organ dysfunction, transplantation is a life-saving intervention. Universally, organs available for transplantation are insufficient to meet population needs.<sup>(1)</sup> Optimal medical management of deceased organ donors may help to address this shortage.<sup>(2, 3)</sup>

In the process that culminates in neurological death, cerebral herniation can induce a catecholamine storm that, when severe, leads to cardiovascular collapse. Hemodynamic instability of any degree threatens the viability of potentially recoverable organs<sup>(4)</sup> and disturbances in the hypothalamo-pituitary-adrenal axis can be an important contributor.<sup>(5)</sup> Though the prevalence of adrenal insufficiency among neurologically deceased organ donors is uncertain,<sup>(6-9)</sup> corticosteroid therapy may alleviate hemodynamic collapse during cerebral herniation.

Cerebral herniation also activates a systemic inflammatory response; thus, anti-inflammatory properties of corticosteroid offer another potential mechanism of benefit.<sup>(10, 11)</sup> Intuitively, inflammation will jeopardize the suitability of organs for transplantation, but prospective cohort studies have generated conflicting results.<sup>(12-14)</sup>

In theory, treatment of potential organ donors with corticosteroids could improve their hemodynamic status, improve organ suitability and attenuate post-transplant organ dysfunction. The *Society of Critical Care Medicine*, the *American College of Chest Physicians*, and the *Association of Organ Procurement Organizations*, recommend high-dose corticosteroid for organ donation following neurological death.<sup>(15)</sup> One recent systematic review addressing this topic concluded that existing research neither confirms nor refutes the efficacy of corticosteroid therapy for neurologically deceased donors.<sup>(16)</sup> To advance this field, we applied GRADE methodology to further define the

1  
2  
3 quality of current evidence, the specific limitations of previously reported trials, and  
4  
5 future research needed to clarify the effects of systemic corticosteroid therapy in  
6  
7 neurologically deceased donors.<sup>(17)</sup>  
8  
9

## 10 11 12 **METHODS**

13  
14 This manuscript was drafted in accordance with the PRISMA guidelines on reporting  
15  
16 of systematic review and meta-analyses.<sup>(18)</sup>  
17  
18

### 19 **Eligibility Criteria**

20  
21 We included published and unpublished randomized controlled trials (RCTs)  
22  
23 enrolling of children and adults neurologically deceased potential organ donors and  
24  
25 comparing corticosteroids to placebo, to no administration of corticosteroids, or to other  
26  
27 active treatments. We focused on the following outcomes: 1) vasopressor requirement  
28  
29 among donors; 2) organ recovery from donors; 3) recipient graft rejection; 4) recipient  
30  
31 graft dysfunction (using individual study definitions); and 5) adverse effects of  
32  
33 corticosteroids in donors and recipients.  
34  
35  
36

### 37 **Search Strategy**

38  
39 With the assistance of a medical librarian we searched MEDLINE, EMBASE and  
40  
41 Cochrane Central from their inception to January 2017. The MEDLINE search strategy is  
42  
43 found in Appendix 1. We searched conference proceedings from the *International*  
44  
45 *Society of Organ Donation and Procurement*, *American Transplant Congress*, the  
46  
47 *Canadian Society of Transplantation*, the *Society of Critical Care Medicine*, and the  
48  
49 *Canadian Critical Care Forum* over five years, as well as clinical trial registries, and we  
50  
51 screened the reference lists of all relevant articles.  
52  
53  
54

### 55 **Eligibility Review and Data Abstraction**

56  
57  
58  
59  
60

1  
2  
3 Two reviewers independently screened citations and evaluated the full text of  
4 potentially eligible studies in duplicate, then abstracted data onto customized, pre-tested  
5 forms. Disagreements between reviewers were resolved through discussion or third  
6 party adjudication. We abstracted data pertaining to study characteristics and design,  
7 population, intervention, comparison and all clinical outcomes. We clarified missing data  
8 through email correspondence with the study author.  
9

### 16 **Assessment of Risk of Bias (single studies) and Quality of Evidence (entire body** 17 **of evidence)** 18 19

20  
21 For each study two reviewers evaluated the risk of bias using the Cochrane  
22 Collaboration tool for RCTs.<sup>(19)</sup> The risk of bias was judge to be at low risk, high risk or  
23 unclear risk with the following domains: treatment allocation, sequence generation and  
24 concealment, blinding, completeness of follow-up, selective outcome reporting and other  
25 potential sources of bias.  
26  
27

28 For each outcome, using GRADE methodology, we evaluated the quality of the entire  
29 body of evidence as high, moderate, low or very low,<sup>(17)</sup> The GRADE system considers  
30 each of the following: overall risk of bias,<sup>(20)</sup> imprecision in estimates of effect,<sup>(21)</sup>  
31 inconsistency in findings across studies,<sup>(22)</sup> indirectness (the extent to which individual  
32 study populations, interventions, and outcome measurements deviate from those of  
33 interest to this review)<sup>(23)</sup> and publication bias.<sup>(24)</sup>  
34  
35

### 36 **Statistical Analyses** 37 38

39 We calculated chance-corrected agreement for eligibility decisions using the kappa  
40 statistic.<sup>(19)</sup> Dichotomous outcomes are reported as relative risks (RR) with their  
41 respective 95% confidence interval (CI) for a two-sided comparison. For pooled  
42 analyses, using Revman software version 5.2 (Copenhagen), we chose a fixed effect  
43  
44  
45  
46  
47  
48  
49  
50  
51  
52  
53  
54  
55  
56  
57  
58  
59  
60

1  
2  
3 rather than a random effect model because estimates of between-study variability are  
4 necessary for random effects estimates and are uncertain when, as in this context, there  
5 are few studies.<sup>(19)</sup> If graft outcomes were measured at more than one interval we used  
6 the shortest one, assuming that steroid effects, if any, would manifest early.  
7 Heterogeneity was measured using the chi square test for homogeneity and the  
8 Cochran  $I^2$ .<sup>(19)</sup>  $I^2$  greater than 50% was considered significant heterogeneity. The Egger  
9 test to address publication bias was not performed as less than 10 studies were  
10 identified.  
11  
12  
13  
14  
15  
16  
17  
18  
19  
20  
21  
22  
23

## 24 RESULTS

### 25 Study selection

26 From 4352 citations, 11 were eligible (Figure 1).<sup>(25-35)</sup> Between-reviewer agreement  
27 at the level of full text review was perfect ( $\kappa = 1$ ). Ten studies were published in  
28 English<sup>(25, 26, 28-35)</sup> and one in French.<sup>(27)</sup>  
29  
30  
31  
32  
33  
34

### 35 Study characteristics

36 Five out of 11 studies explicitly mentioned Ethics Review Board approval, and fewer  
37 detailed the approach to research consent.<sup>(26, 28-30, 35)</sup> Four publications with a focus on  
38 recipient outcomes reported separately for different organs from the same donors.  
39 Specifically, one trial was reported in two distinct publications addressing outcome  
40 related to the kidney<sup>(26)</sup> and to the liver respectively.<sup>(30)</sup> A second trial of a single donor  
41 cohort reported separately on outcomes related to lung<sup>(36)</sup> and heart.<sup>(28)</sup>  
42  
43  
44  
45  
46  
47  
48  
49  
50

51 Four publications did not state the number of donors enrolled, because recipient  
52 outcomes were the focus.<sup>(16, 31-34)</sup> When reported, the number of donors ranged from 40  
53 to 269, and baseline characteristics were similar between study groups.<sup>(26, 28-30, 35)</sup> The  
54  
55  
56  
57  
58  
59  
60

1  
2  
3 mean donor age varied from 30 to 40 years. The most common cause for neurological  
4 death was vascular injury (e.g. stroke, subarachnoid hemorrhage), followed by traumatic  
5 brain injury.<sup>(26, 28, 35)</sup>  
6  
7  
8  
9

10 Participants in these studies also included transplant recipients in the eight trials  
11 reporting on transplant outcomes, of whom there were 885 kidney recipients and 183  
12 liver recipients.<sup>(25, 26, 29-34)</sup> Their baseline characteristics were reported in only three  
13 publications.<sup>(26, 29, 30)</sup> Groups were similar and liver recipients had favourable prognosis  
14 at baseline with a mean Model For End-Stage Liver Disease (MELD) score between 14  
15 and 16.<sup>(29, 30)</sup> Two studies measured graft outcome only among patients transplanted in  
16 the participating organ donation centre and excluded all recipients transplanted in other  
17 facilities.<sup>(29, 31)</sup>  
18  
19  
20  
21  
22  
23  
24  
25  
26  
27

28 Table 1 presents the study corticosteroid regimens. A single intravenous dose of  
29 methylprednisolone was the most common regimen, ranging in dose from 1 gram to 5  
30 grams. Three trials tested corticosteroid therapy in isolation,<sup>(26, 29, 30)</sup> two others  
31 evaluated corticosteroids in a factorial design with liothyronine,<sup>(28, 35)</sup> one as part of  
32 combined hormonal therapy with liothyronine<sup>(27)</sup> and five placebo-controlled trials  
33 administered corticosteroids in combination with cyclophosphamide.<sup>(25, 31-34)</sup> The timing  
34 of corticosteroid therapy also varied across studies. Corticosteroids were administered  
35 30 to 60 minutes after death declaration in one study,<sup>(27)</sup> immediately after consent for  
36 organ donation in three studies,<sup>(28, 29, 35)</sup> and three to eight hours before surgery in seven  
37 studies.<sup>(25, 26, 30-34)</sup> In most studies, methylprednisolone was dosed every 24 hours.<sup>(25, 26,  
38 28, 30-35)</sup>  
39  
40  
41  
42  
43  
44  
45  
46  
47  
48  
49  
50  
51  
52  
53  
54  
55  
56  
57  
58  
59  
60

**Table 1: Prospective Randomized Trials of Steroids Administration in Neurologically Dead Donors- Summary of the Studies**

| Author, Year                        | Donors/ Recipients (n) | Organs Recovered | Experimental Intervention                                                                                              | Control intervention |
|-------------------------------------|------------------------|------------------|------------------------------------------------------------------------------------------------------------------------|----------------------|
| <b>Parallel Design</b>              |                        |                  |                                                                                                                        |                      |
| Chatterjee, 1977 <sup>(25)</sup>    | 50<br>84               | Kidney           | MTP 5 g IV single dose after brain death confirmation                                                                  | Usual care           |
| Dienst, 1977 <sup>(32)</sup>        | NR<br>106              | Kidney           | MTP 3 g IV + Cy 3 g IV single doses 5-8 hrs. before organ recovery                                                     | Usual care           |
|                                     | NR<br>45               |                  | MTP 5 g IV + Cy 3 g IV single doses 5-8 hrs. before organ recovery                                                     | Usual care           |
|                                     | NR<br>29               |                  | MTP 5 g IV + Cy 5 g IV single doses 5-8 hrs. before organ recovery                                                     | Placebo              |
| Jeffery, 1978 <sup>(33)</sup>       | NR<br>52               | Kidney           | MTP 5 g IV +Cy 7 g IV single doses $\geq$ 4 hrs. before organ recovery                                                 | Usual care           |
| Soulillou, 1979 <sup>(34)</sup>     | NR<br>62               | Kidney           | MTP 5 g IV + Cy 5 g IV single doses $\geq$ 5 hrs. before organ recovery                                                | Placebo              |
| Corry, 1980 <sup>(31)</sup>         | NR<br>52               | Kidney           | MTP 60 mg/kg IV +Cy 80 mg/kg IV single doses $\geq$ 5 hrs. before organ recovery                                       | Usual care           |
| Mariot, 1980 <sup>(27)</sup>        | 40<br>NR               | Multi-organs     | Hydrocortisone 100 mg IV+ T <sub>3</sub> 2 mcg IV after brain death confirmation q.30-60 min. until stable CVP and SBP | Placebo              |
| Kotsch, 2008 <sup>(29)</sup>        | 100<br>100             | Liver            | MTP 250 mg IV + 100 mg/h IV after brain death confirmation                                                             | Usual care           |
| Kainz, 2010 <sup>(26)</sup>         | 269<br>455             | Kidney           | MTP 1 g single dose $\geq$ 3 hrs. before organ recovery                                                                | Placebo              |
| Amatschek, 2012 <sup>(30)</sup>     | 8390<br>83             | Liver            | MTP 1 g single dose $\geq$ 3 hrs. before organ recovery                                                                | Placebo              |
| <b>Factorial Design</b>             |                        |                  |                                                                                                                        |                      |
| Venkateswaran, 2008 <sup>(35)</sup> | 60<br>NR               | Lung             | MTP 1 g IV single dose +/- T <sub>3</sub> 0.8 ug/kg +0.113 ug/kg/hr IV after brain death confirmation                  | Placebo              |
| Venkateswaran, 2009 <sup>(28)</sup> | 80<br>NR               | Heart            | MTP 1 g IV single dose +/- T <sub>3</sub> 0.8 ug/kg +0.113 ug/kg/hr IV after brain death confirmation                  | Placebo              |

Legend : CVP= Central Venous Pressure, Cy = Cyclophosphamide, MTP = Methylprednisolone, NR = Not Reported, SBP = Systolic Blood Pressure, T<sub>3</sub>= Liothyronin



## Risk of bias of individual studies

Using the Cochrane tool,<sup>(19)</sup> four RCTs published after 1995 had low risk of bias.<sup>(26-30,</sup>  
<sup>35)</sup> Earlier trials reported insufficient information to evaluate risk of bias (Figure 2).<sup>(25, 31-34)</sup>

## Results of individual studies and pooled results

### *Vasopressor requirement*

The three studies (n = 452 donors) that reported on vasopressor administration most commonly used norepinephrine.<sup>(26, 29, 30)</sup> Individually and when pooled, corticosteroid did not influence the rate of vasopressor use in these studies (pooled RR 0.96; 95% CI 0.89 to 1.05; moderate quality) (Figure 3). The GRADE quality of evidence was rated down to moderate quality primarily because this outcome was relatively susceptible to lack of blinding (Table 2).

### *Organ recovery*

Four trials evaluated organ recovery rates, but these data were analysed and reported differently across the four trials. None of the individual trials reported results suggesting increased organ recovery with steroids. Two trials (n = 309 donors) reported on the number of donors that provided multiple organs,<sup>(26, 27)</sup> and the pooled estimate suggested no effect of corticosteroids but with a very wide confidence interval including substantial benefit (RR 0.82; 95% CI 0.61 to 1.11; moderate quality) (Figure 4). Similarly, in a factorial RCT, investigators did not demonstrate a significant increase in the number of hearts recovered or suitable for transplantation.<sup>(28)</sup> In a *post hoc* analysis, Venkateswaran observed a decrease in the extravascular lung water index with the administration of corticosteroids; this could potentially increase the number of lungs suitable for transplantation if taken into consideration during donor care. (35) For this

1  
2  
3  
4  
5  
6  
7  
8  
9  
10  
11  
12  
13  
14  
15  
16  
17  
18  
19  
20  
21  
22  
23  
24  
25  
26  
27  
28  
29  
30  
31  
32  
33  
34  
35  
36  
37  
38  
39  
40  
41  
42  
43  
44  
45  
46  
47  
48  
49  
50  
51  
52  
53  
54  
55  
56  
57  
58  
59  
60

group of outcomes, we rated down the quality of evidence to moderate because of imprecision (wide confidence intervals) (Table 2).

For peer review only

Table 2: GRADE Profile

| Quality assessment |              |                      |                      |                          |                      |                      | Quality         |
|--------------------|--------------|----------------------|----------------------|--------------------------|----------------------|----------------------|-----------------|
| No of studies      | Study design | Risk of bias         | Inconsistency        | Indirectness             | Imprecision          | Other considerations |                 |
| 3                  | RCT          | serious <sup>a</sup> | not serious          | not serious              | not serious          | none                 | ⊕⊕⊕<br>MODERATE |
| 2                  | RCT          | not serious          | not serious          | not serious              | serious <sup>b</sup> | none                 | ⊕⊕⊕<br>MODERATE |
| 3                  | RCT          | not serious          | serious <sup>c</sup> | not serious              | serious <sup>b</sup> | none                 | ⊕⊕<br>LOW       |
| 8                  | RCT          | serious <sup>d</sup> | not serious          | serious <sup>e,f,g</sup> | not serious          | none                 | ⊕⊕<br>LOW       |

RCT= Randomized Clinical Trial, RR= Relative Risk

*a* =Lack of blinding, *b* = Wide confidence interval suggesting appreciable harm or benefit, *c* = Large variation in effect, *d* large, *d* = Selection bias.

*e* = Different definition of the same outcome, *f* = Surrogate outcomes used to describe graft function, *g* = Co intervention.

### *Transplant outcomes (acute graft rejection and graft function)*

Three trials (n = 235 recipients) studied acute graft rejection.<sup>(29, 30, 33)</sup> Trials on acute liver rejection reported conflicting results.<sup>(29, 30)</sup> Amatschek et al. reported similar risks of acute rejection as measured from routine biopsy specimens at three months.<sup>(30)</sup> However, Kotsch et al. obtained a lower rate of acute rejection, in the corticosteroid group, on routine biopsies within the first six months.<sup>(29)</sup> Jeffery et al. did not find a reduction in the number of acute kidney rejection with corticosteroids within the first year.<sup>(33)</sup> Episodes of rejection were diagnosed on the basis of an increase in serum creatinine of more than 0.2 mg/100ml, clinical findings and absence of alternative diagnosis explaining worsening renal function. Pooled estimates do not suggest that corticosteroids reduce the risk of acute graft rejection (RR 0.91; 95% CI 0.60 to 1.39; low confidence) (Figure 5). For this group of outcomes, we rated down the overall quality of evidence to low because of inconsistency (large variation in effect between studies) and imprecision (Table 2).

Of the eight RCTs (n = 1068 recipients) that evaluated graft outcomes,<sup>(25, 26, 29-34)</sup> two trials provided conflicting results on liver graft function. Kotsch et al. reported a reduction in transaminase levels within the ten days after transplantation among patients receiving corticosteroid therapy.<sup>(29)</sup> In contrast, Amatschek et al. obtained similar transaminase levels within seven days.<sup>(30)</sup> Six studies compared a composite risk of one or more of the following data: creatinine level, creatinine clearance, dialysis, listed for kidney transplantation or death at different time interval.<sup>(25, 26, 31-34)</sup> Pooled estimates, suggest no effect of corticosteroids on graft function (RR 1.01; 95% CI 0.83 to 1.24; low confidence) (Figure 6). Individual studies had high risk of bias, (lack of blinding and loss to follow up) and also provided only indirect evidence because they combined steroids

1  
2  
3 with cyclophosphamide in the experimental groups. Therefore, we rated the quality of  
4 evidence for this outcome as low (Table 2).  
5  
6

### 7 *Adverse effects*

8  
9  
10 Only two studies evaluated steroid-related adverse events. Investigators reported no  
11 effect on infection rates among donors.<sup>(29)</sup> Bile duct complications and hepatitis C virus  
12 reinfection following liver transplantation were similar between groups.<sup>(29, 30)</sup>  
13  
14  
15  
16  
17  
18

## 19 **DISCUSSION**

20  
21 We systematically reviewed 11 RCTs evaluating the efficacy of corticosteroid therapy  
22 in potential organ donors with respect to clinically important outcomes among both  
23 donors and recipients. Individual studies applied a variety of dosing strategies and study  
24 outcomes, and very few suggested any difference between corticosteroid and control  
25 groups. When two or more studies measured the same outcome, pooled results did not  
26 support a treatment effect for hemodynamic stability, the number of organs recovered,  
27 or transplant function. The overall quality of evidence was moderate or low for these  
28 outcomes, limiting our confidence in the results.  
29  
30  
31  
32  
33  
34  
35  
36  
37  
38  
39

40 Strengths of our study include a comprehensive search, independent duplicate  
41 assessments of study eligibility, risk of bias, and data abstraction, and the pooling of  
42 results across studies where possible. Most importantly, we applied the GRADE system  
43 to rate the quality of evidence for each outcome that was addressed by more than one  
44 study. It provides a transparent assessment of our confidence in the estimates of the  
45 effect of steroids on key clinical outcomes in potential organ donors. The GRADE  
46 assessment is definitely an added value as it will provide knowledge users with  
47 evaluations of the quality of evidence underlying the use of steroids in potential organ  
48  
49  
50  
51  
52  
53  
54  
55  
56  
57  
58  
59  
60

1  
2  
3 donors. In doing so, our goal was to support guidelines for clinical care and to highlight  
4 areas for improving scientific rigor in this field. A primary limitation of this review was the  
5 inability to address differences in effect with different dosing regimens, or between organ  
6 types, based on the small number of studies to support such subgroup analyses.  
7  
8  
9  
10

11  
12 Limitations of our study are largely those of the original studies and thus of the body  
13 of evidence to which they contribution. Applying GRADE methodology, the overall  
14 quality of evidence was rated down as a result of the risk of bias, indirectness of  
15 evidence, inconsistency and imprecision. While the risk of bias among five studies  
16 reported in the past 20 years was relatively low, the risk of bias was uncertain for six  
17 earlier studies, and may be high.<sup>(37)</sup> Risk of bias was related to lack of blinding and  
18 possible selection bias in the unexplained post-randomization exclusion of specific  
19 transplant recipients from some studies.<sup>(29, 31)</sup>  
20  
21  
22  
23  
24  
25  
26  
27  
28  
29  
30

31 Another limitation is that studies did not take the clustering of organs within donors (a  
32 single donor can contribute up to 7 organs) into account in the analysis. To the extent  
33 that organs from some donors do systematically better than organs from other donors,  
34 the confidence intervals presented in the studies are narrower than would be the case in  
35 an analysis that took clustering into account.  
36  
37  
38  
39  
40  
41

42 Indirectness of evidence was another important reason for rating down the overall  
43 quality of evidence. Six studies combining all steroid interventions (but not control  
44 interventions) with other hormone therapies,<sup>(27,34)</sup> or with cyclophosphamide,<sup>(30-33)</sup>  
45 provide only indirect evidence of the potential treatment effects of corticosteroids alone.  
46 Variation in timing of randomization and subsequent administration of study intervention  
47 also have affected treatment effect presuming that later administration (i.e. 5-8 hours  
48 before organ recovery) may be less effective. Indirectness also comes into play when  
49  
50  
51  
52  
53  
54  
55  
56  
57  
58  
59  
60

1  
2  
3 evaluating studies of varied dosing regimens; it is conceivable that the apparent lack of  
4 effect overall is a result of assessing relatively helpful regimens alongside of those that  
5 are relatively harmful.  
6  
7  
8

9  
10 Finally, we also rated down the quality of evidence for two outcomes on the basis of  
11 imprecision. The small number of studies, patients within studies, and events among  
12 patients resulted not only in wide confidence intervals but also precluded subgroup  
13 analyses and assessment for publication bias. In summary, because the quality of  
14 evidence is low for at least two outcomes, this review cannot support strong  
15 recommendations for clinical care.  
16  
17  
18  
19  
20  
21  
22

23  
24 Inferences from this systematic review are also limited by varied outcomes of graft  
25 dysfunction; variable results across outcomes (apparent harm in number of organs  
26 recovered and apparent benefit in graft rejection; varied definitions for each specific  
27 term; and the inability to apply outcome definitions across organ groups, which is  
28 important in this field because one organ donor may donate kidneys, liver, lung, heart,  
29 and/or pancreas or small bowel. For example, outcomes of renal graft function across  
30 studies included graft failure,<sup>(25, 34)</sup> graft survival,<sup>(31, 32)</sup> and delayed graft function.<sup>(26)</sup>  
31 Even the measurement of renal 'graft failure' was problematic for pooling across studies:  
32 Chatterjee et al. defined graft failure as a composite outcome of kidney removal after  
33 transplantation, return to hemodialysis or death,<sup>(25)</sup> while Souillou et al. defined graft  
34 failure as any requirement for hemodialysis or a serum creatinine level (threshold not  
35 specified) after transplantation.<sup>(34)</sup> Unified outcome measures for specific organs, and  
36 potentially generic outcome measures across organ groups, would help to advance the  
37 science of organ donor management.  
38  
39  
40  
41  
42  
43  
44  
45  
46  
47  
48  
49  
50  
51  
52  
53  
54  
55  
56  
57  
58  
59  
60

1  
2  
3 Our results are similar to those previously reported.<sup>(16, 38)</sup> However, we went  
4 beyond prior reviews in conducting meta-analyses and using the GRADE approach for  
5 rating the quality of evidence. Unfortunately, the moderate or low quality of evidence  
6 does not allow strong inferences about the use of steroids in these populations.<sup>(15, 39)</sup>  
7  
8  
9

10  
11  
12 Although observational studies frequently overestimate treatment effects, and these  
13 might have been confounded by surgical interventions, organ preservation techniques  
14 and transplant recipient characteristics, evidence from the current RCTs is also limited in  
15 quality. In a recent European multicentre observational study (n = 259), administration  
16 of corticosteroids to deceased organ donors with a neurological determination of death  
17 was associated with a lower dose of norepinephrine (steroid group [SG] = 1.18 +/- 0.92  
18 mg/h vs control group [CG] = 1.49 +/- 1.29 mg/h, p = 0.03) and shorter duration of  
19 vasopressor support (SG = 874 min vs CG = 1160 min., p < 0.0001).<sup>(40)</sup> The incidence of  
20 delayed graft function among recipients was similar between the two groups (SG =  
21 30.8% vs CG = 26.6%, p=0.14). These findings are consistent with expected effects  
22 regarding the impact of corticosteroid therapy in potential organ donors.  
23  
24  
25  
26  
27  
28  
29  
30  
31  
32  
33  
34  
35  
36  
37

38 This systematic review highlights three challenges of research addressing the  
39 medical management of deceased organ donors: the scarcity of donors, practical  
40 challenges of studying therapeutic interventions and subsequent outcomes among very  
41 separate study populations, (i.e., organ donors and transplant recipients), and the  
42 complexity of definitions of graft function. These challenges will only be met through  
43 research collaborations, recruiting all eligible patients into clinical trials, and possibly  
44 with models of consent that are adapted to the reality of organ donation.  
45  
46  
47  
48  
49  
50  
51  
52  
53  
54  
55  
56  
57  
58  
59  
60



## CONCLUSION

Current clinical trials do not identify benefits of corticosteroid therapy for deceased organ donors or their transplant recipients. The quality of this evidence is insufficient, however, to rule out the possibility of benefits or harms with respect to donation rates or transplant outcomes for any organ. In light of these results, there is no imperative to modify current recommendations for clinical care, based on observational studies, to consider corticosteroid therapy in the management of organ donors.

## ACKNOWLEDGEMENTS

None

## SOURCE OF FUNDING

None

## FIGURE LEGEND

Figure 1: Flow Diagram

Figure 2: Risk of Bias across the Included Studies

Figure 3: The Effect of Corticosteroids on Vasopressor Requirement

Figure 4: The Effect of Corticosteroids on Successful Donation of More Than One Organ

Figure 5: The Effect of Corticosteroids on Acute Graft Rejection at Three Months

Figure 6: Forest Plot of the Effect of Corticosteroids on Graft Dysfunction

## STATEMENT

All authors have made material contributions to this manuscript according to the rules of authorship of ICMJE. Specifically, here are the contributions of each author:

F D'Aragon: Conception of the design, acquisition of data, analysis and interpretation of the data, draft and revised the manuscript, approved the final version to be published;

E Belley Cote: Conception of the design, acquisition of data, analysis and interpretation of the data, draft and revised the manuscript and approved final version to be published;

A Argawal: Conception of the design, acquisition and analysis of the data, draft and revised the manuscript, approved final version to be published;

AJ Frenette: Conception of the design, acquisition and analysis of the data, draft and revised manuscript and approved the final version to be published;

F Lamontagne: Conception of the design, acquisition and analysis of the data, draft and revised manuscript and approved the final version to be published;

G Guyatt: Conception of the design, acquisition and analysis of the data, draft and revised the manuscript and approved the final version to be published;

S Dhanani: Conception of the design, acquisition and analysis of the data, draft and revised the manuscript and approved the final version to be published;

M Meade: Conception of the design, data acquisition and analysis, draft and revised the manuscript and approved the final version to be published.

All authors report no competing interest.

No funding was obtained for the completion of this work.

There isn't any additional data from this work.

## REFERENCES

1. Deceased Organ Donor Potential in Canada [Internet]. 2014.
2. Rosendale JD, Chabalewski FL, McBride MA, Garrity ER, Rosengard BR, Delmonico FL, et al. Increased transplanted organs from the use of a standardized donor management protocol. *Am J Transplant*. 2002 Sep;2(8):761-8. PubMed PMID: 12243497. Epub 2002/09/24. eng.
3. Dhanani S, Shemie SD. Advancing the science of organ donor management. *Crit Care*. 2014;18(6):612. PubMed PMID: 25672523. Pubmed Central PMCID: PMC4331331. Epub 2015/02/13. eng.
4. Shemie SD. Resuscitation and stabilization of the critically ill child. 1st ed2009.
5. Cooper DK, Novitzky D, Wicomb WN, Basker M, Rosendale JD, Myron Kauffman H. A review of studies relating to thyroid hormone therapy in brain-dead organ donors. *Frontiers in bioscience (Landmark edition)*. 2009;14:3750-70. PubMed PMID: 19273308. Epub 2009/03/11. eng.
6. Dimopoulou I, Tsagarakis S, Anthi A, Milou E, Ilias I, Stavrakaki K, et al. High prevalence of decreased cortisol reserve in brain-dead potential organ donors. *Critical care medicine*. 2003 Apr;31(4):1113-7. PubMed PMID: 12682481. Epub 2003/04/19. eng.
7. Gramm HJ, Meinhold H, Bickel U, Zimmermann J, von Hammerstein B, Keller F, et al. Acute endocrine failure after brain death? *Transplantation*. 1992 Nov;54(5):851-7. PubMed PMID: 1332223. Epub 1992/11/01. eng.
8. Howlett TA, Keogh AM, Perry L, Touzel R, Rees LH. Anterior and posterior pituitary function in brain-stem-dead donors. A possible role for hormonal replacement therapy. *Transplantation*. 1989 May;47(5):828-34. PubMed PMID: 2718243. Epub 1989/05/01. eng.
9. Nicolas-Robin A, Barouk JD, Darnal E, Riou B, Langeron O. Free cortisol and accuracy of total cortisol measurements in the diagnosis of adrenal insufficiency in brain-dead patients. *Anesthesiology*. 2011 Sep;115(3):568-74. PubMed PMID: 21795963. Epub 2011/07/29. eng.
10. Barklin A. Systemic inflammation in the brain-dead organ donor. *Acta Anaesthesiol Scand*. 2009 Apr;53(4):425-35. PubMed PMID: 19226294. Epub 2009/02/20. eng.
11. Smith M. Physiologic changes during brain stem death--lessons for management of the organ donor. *J Heart Lung Transplant*. 2004 Sep;23(9 Suppl):S217-22. PubMed PMID: 15381167. Epub 2004/09/24. eng.
12. Murugan R, Venkataraman R, Wahed AS, Elder M, Carter M, Madden NJ, et al. Preload responsiveness is associated with increased interleukin-6 and lower organ yield from brain-dead donors. *Critical care medicine*. 2009 Aug;37(8):2387-93. PubMed PMID: 19531941. Pubmed Central PMCID: PMC2864555. Epub 2009/06/18. eng.
13. Birks EJ, Owen VJ, Burton PB, Bishop AE, Banner NR, Khaghani A, et al. Tumor necrosis factor-alpha is expressed in donor heart and predicts right ventricular failure after human heart transplantation. *Circulation*. 2000 Jul 18;102(3):326-31. PubMed PMID: 10899097. Epub 2000/07/19. eng.
14. Lopau K, Mark J, Schramm L, Heidbreder E, Wanner C. Hormonal changes in brain death and immune activation in the donor. *Transpl Int*. 2000;13 Suppl 1:S282-5. PubMed PMID: 11112013. Epub 2000/12/09. eng.

15. Kotloff RM, Blosser S, Fulda GJ, Malinoski D, Ahya VN, Angel L, et al. Management of the Potential Organ Donor in the ICU: Society of Critical Care Medicine/American College of Chest Physicians/Association of Organ Procurement Organizations Consensus Statement. *Critical care medicine*. 2015 Jun;43(6):1291-325. PubMed PMID: 25978154. Epub 2015/05/16. eng.
16. Dupuis S, Amiel JA, Desgroseilliers M, Williamson DR, Thiboutot Z, Serri K, et al. Corticosteroids in the management of brain-dead potential organ donors: a systematic review. *Br J Anaesth*. 2014 Sep;113(3):346-59. PubMed PMID: 24980425. Epub 2014/07/02. eng.
17. Guyatt GH, Oxman AD, Vist GE, Kunz R, Falck-Ytter Y, Alonso-Coello P, et al. GRADE: an emerging consensus on rating quality of evidence and strength of recommendations. *BMJ*. 2008 Apr 26;336(7650):924-6. PubMed PMID: 18436948. Pubmed Central PMCID: PMC2335261.
18. Moher D, Liberati A, Tetzlaff J, Altman DG. Preferred reporting items for systematic reviews and meta-analyses: the PRISMA statement. *BMJ (Clinical research ed)*. 2009 Jul 21;339:b2535. PubMed PMID: 19622551. Pubmed Central PMCID: PMC2714657. Epub 2009/07/23. eng.
19. Higgins Julian PT GS. *Cochrane Handbook for Systematic Reviews of Interventions* <http://handbook.cochrane.org/>; Cochrane Collaboration; 2011.
20. Guyatt GH, Oxman AD, Vist G, Kunz R, Brozek J, Alonso-Coello P, et al. GRADE guidelines: 4. Rating the quality of evidence--study limitations (risk of bias). *J Clin Epidemiol*. 2011 Apr;64(4):407-15. PubMed PMID: 21247734.
21. Guyatt GH, Oxman AD, Kunz R, Brozek J, Alonso-Coello P, Rind D, et al. GRADE guidelines 6. Rating the quality of evidence--imprecision. *J Clin Epidemiol*. 2011 Dec;64(12):1283-93. PubMed PMID: 21839614. Epub 2011/08/16. eng.
22. Guyatt GH, Oxman AD, Kunz R, Woodcock J, Brozek J, Helfand M, et al. GRADE guidelines: 7. Rating the quality of evidence--inconsistency. *J Clin Epidemiol*. 2011 Dec;64(12):1294-302. PubMed PMID: 21803546.
23. Guyatt GH, Oxman AD, Kunz R, Woodcock J, Brozek J, Helfand M, et al. GRADE guidelines: 8. Rating the quality of evidence--indirectness. *J Clin Epidemiol*. 2011 Dec;64(12):1303-10. PubMed PMID: 21802903.
24. Guyatt GH, Oxman AD, Montori V, Vist G, Kunz R, Brozek J, et al. GRADE guidelines: 5. Rating the quality of evidence--publication bias. *J Clin Epidemiol*. 2011 Dec;64(12):1277-82. PubMed PMID: 21802904. Epub 2011/08/02. eng.
25. Chatterjee SN, Terasaki PI, Fine S, Schulman B, Smith R, Fine RN. Pretreatment of cadaver donors with methylprednisolone in human renal allografts. *Surg Gynecol Obstet*. 1977 Nov;145(5):729-32. PubMed PMID: 333644. Epub 1977/11/01. eng.
26. Kainz A, Wilflingseder J, Mitterbauer C, Haller M, Burghuber C, Perco P, et al. Steroid pretreatment of organ donors to prevent postischemic renal allograft failure: a randomized, controlled trial. *Ann Intern Med*. 2010 Aug 17;153(4):222-30. PubMed PMID: 20713790. Epub 2010/08/18. eng.
27. Mariot J, Jacob F, Voltz C, Perrier JF, Strub P. [Value of hormonal treatment with triiodothyronine and cortisone in brain dead patients]. *Ann Fr Anesth Reanim*. 1991;10(4):321-8. PubMed PMID: 1928853. Epub 1991/01/01. Interet de l'hormonotherapie associant triiodothyronine et cortisone chez le patient en etat de mort cerebrale. fre.

- 1  
2  
3 28. Venkateswaran RV, Steeds RP, Quinn DW, Nightingale P, Wilson IC, Mascaro  
4 JG, et al. The haemodynamic effects of adjunctive hormone therapy in potential heart  
5 donors: a prospective randomized double-blind factorially designed controlled trial. *Eur*  
6 *Heart J*. 2009 Jul;30(14):1771-80. PubMed PMID: 19324916. Epub 2009/03/28. eng.
- 7 29. Kotsch K, Ulrich F, Reutzel-Selke A, Pascher A, Faber W, Warnick P, et al.  
8 Methylprednisolone therapy in deceased donors reduces inflammation in the donor liver  
9 and improves outcome after liver transplantation: a prospective randomized controlled  
10 trial. *Ann Surg*. 2008 Dec;248(6):1042-50. PubMed PMID: 19092349. Epub 2008/12/19.  
11 eng.
- 12 30. Amatschek S, Wilflingseder J, Pones M, Kainz A, Bodingbauer M, Muhlbacher F,  
13 et al. The effect of steroid pretreatment of deceased organ donors on liver allograft  
14 function: a blinded randomized placebo-controlled trial. *J Hepatol*. 2012 Jun;56(6):1305-  
15 9. PubMed PMID: 22326464. Pubmed Central PMCID: PMC3355301. Epub 2012/02/14.  
16 eng.
- 17 31. Corry RJ, Patel NP, West JC, Schanbacher BA. Pretreatment of cadaver donors  
18 with cyclophosphamide and methylprednisolone: effect on renal transplant outcome.  
19 *Transplant Proc*. 1980 Jun;12(2):348-51. PubMed PMID: 6994305. Epub 1980/06/01.  
20 eng.
- 21 32. Dienst SG. Statewide donor pretreatment study. *Transplant Proc*. 1977  
22 Sep;9(3):1597-9. PubMed PMID: 331595. Epub 1977/09/01. eng.
- 23 33. Jeffery JR, Downs A, Grahame JW, Lye C, Ramsey E, Thomson AE. A  
24 randomized prospective study of cadaver donor pretreatment in renal transplantation.  
25 *Transplantation*. 1978 Jun;25(6):287-9. PubMed PMID: 351886. Epub 1978/06/01. eng.
- 26 34. Souillou JP, Baron D, Rouxel A, Guenel J. Steroid-cyclophosphamide  
27 pretreatment of kidney allograft donors. A control study. *Nephron*. 1979;24(4):193-7.  
28 PubMed PMID: 386157. Epub 1979/01/01. eng.
- 29 35. Venkateswaran RV, Patchell VB, Wilson IC, Mascaro JG, Thompson RD, Quinn  
30 DW, et al. Early donor management increases the retrieval rate of lungs for  
31 transplantation. *Ann Thorac Surg*. 2008 Jan;85(1):278-86; discussion 86. PubMed  
32 PMID: 18154823. Epub 2007/12/25. eng.
- 33 36. Venkateswaran RV, Dronavalli V, Patchell V, Wilson I, Mascaro J, Thompson R,  
34 et al. Measurement of extravascular lung water following human brain death:  
35 implications for lung donor assessment and transplantation. *Eur J Cardiothorac Surg*.  
36 2013 Jun;43(6):1227-32. PubMed PMID: 23277434. Epub 2013/01/02. eng.
- 37 37. Akl EA, Sun X, Busse JW, Johnston BC, Briel M, Mulla S, et al. Specific  
38 instructions for estimating unclearly reported blinding status in randomized trials were  
39 reliable and valid. *Journal of clinical epidemiology*. 2012 Mar;65(3):262-7. PubMed  
40 PMID: 22200346. Epub 2011/12/28. eng.
- 41 38. Rech TH, Moraes RB, Crispim D, Czepielewski MA, Leitao CB. Management of  
42 the brain-dead organ donor: a systematic review and meta-analysis. *Transplantation*.  
43 2013 Apr 15;95(7):966-74. PubMed PMID: 23545508. Epub 2013/04/03. eng.
- 44 39. Shemie SD, Ross H, Pagliarello J, Baker AJ, Greig PD, Brand T, et al. Organ  
45 donor management in Canada: recommendations of the forum on Medical Management  
46 to Optimize Donor Organ Potential. *CMAJ*. 2006 Mar 14;174(6):S13-32. PubMed PMID:  
47 16534070. Pubmed Central PMCID: PMC1402396. Epub 2006/03/15. eng  
48 fre.
- 49  
50  
51  
52  
53  
54  
55  
56  
57  
58  
59

1  
2  
3 40. Pinsard M, Ragot S, Mertes PM, Bleichner JP, Zitouni S, Cook F, et al. Interest of  
4 low-dose hydrocortisone therapy during brain-dead organ donor resuscitation: the  
5 CORTICOME study. Crit Care. 2014 Jul 23;18(4):R158. PubMed PMID: 25056510.  
6 Pubmed Central PMCID: PMC4220083. Epub 2014/07/25. eng.  
7  
8  
9  
10  
11  
12  
13  
14  
15  
16  
17  
18  
19  
20  
21  
22  
23  
24  
25  
26  
27  
28  
29  
30  
31  
32  
33  
34  
35  
36  
37  
38  
39  
40  
41  
42  
43  
44  
45  
46  
47  
48  
49  
50  
51  
52  
53  
54  
55  
56  
57  
58  
59  
60

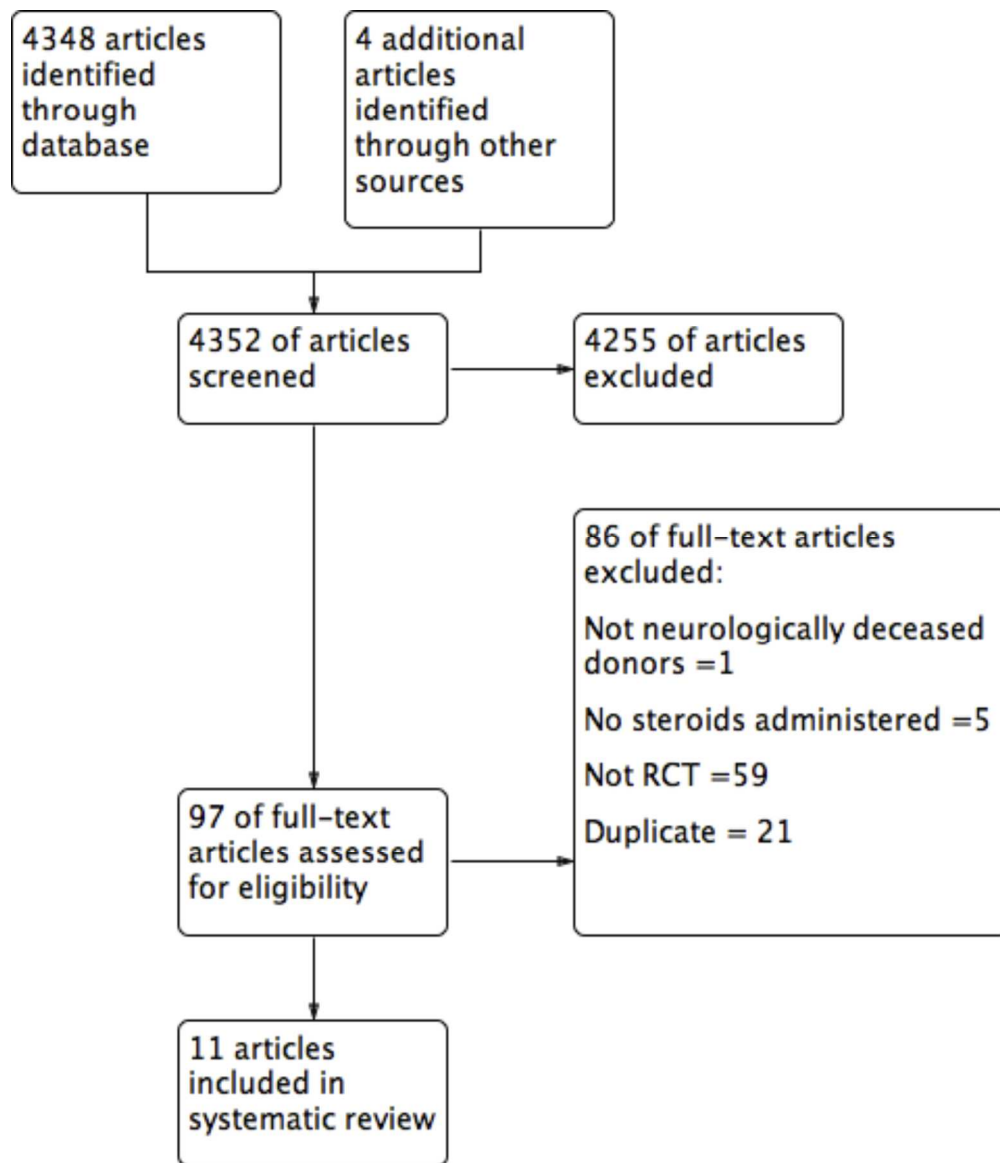

173x200mm (300 x 300 DPI)

|                    | Random sequence generation (selection bias) | Allocation concealment (selection bias) | Blinding of participants and personnel (performance bias) | Blinding of outcome assessment (detection bias) | Incomplete outcome data (attrition bias) | Selective reporting (reporting bias) | Other bias |
|--------------------|---------------------------------------------|-----------------------------------------|-----------------------------------------------------------|-------------------------------------------------|------------------------------------------|--------------------------------------|------------|
| Amatschek 2012     | +                                           | +                                       | +                                                         | ?                                               | +                                        | +                                    | +          |
| Chatterjee 1977    | +                                           | +                                       | -                                                         | ?                                               | -                                        | +                                    | -          |
| Corry 1980         | -                                           | ?                                       | -                                                         | ?                                               | -                                        | +                                    | -          |
| Dienst 1977        | -                                           | ?                                       | -                                                         | ?                                               | -                                        | +                                    | -          |
| Jeffery 1978       | +                                           | ?                                       | -                                                         | ?                                               | -                                        | ?                                    | -          |
| Kainz 2010         | +                                           | +                                       | +                                                         | ?                                               | +                                        | +                                    | +          |
| Kotsch 2008        | ?                                           | ?                                       | -                                                         | +                                               | +                                        | ?                                    | +          |
| Mariot 1991        | +                                           | ?                                       | +                                                         | ?                                               | +                                        | ?                                    | ?          |
| Soulillou 1979     | -                                           | ?                                       | +                                                         | ?                                               | -                                        | +                                    | -          |
| Venkateswaran 2008 | +                                           | +                                       | +                                                         | ?                                               | +                                        | -                                    | -          |
| Venkateswaran 2009 | +                                           | +                                       | +                                                         | ?                                               | +                                        | +                                    | -          |

270x349mm (300 x 300 DPI)



1  
2  
3  
4  
5  
6  
7  
8  
9  
10  
11  
12  
13  
14  
15  
16  
17  
18  
19  
20  
21  
22  
23  
24  
25  
26  
27  
28  
29  
30  
31  
32  
33  
34  
35  
36  
37  
38  
39  
40  
41  
42  
43  
44  
45  
46  
47  
48  
49  
50  
51  
52  
53  
54  
55  
56  
57  
58  
59  
60



195x40mm (300 x 300 DPI)

For peer review only

1  
2  
3  
4  
5  
6  
7  
8  
9  
10  
11  
12  
13  
14  
15  
16  
17  
18  
19  
20  
21  
22  
23  
24  
25  
26  
27  
28  
29  
30  
31  
32  
33  
34  
35  
36  
37  
38  
39  
40  
41  
42  
43  
44  
45  
46  
47  
48  
49  
50  
51  
52  
53  
54  
55  
56  
57  
58  
59  
60

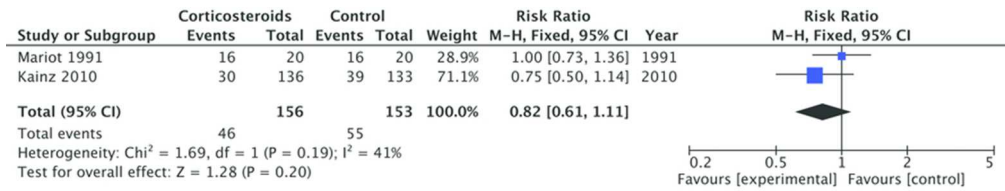

37x7mm (600 x 600 DPI)

For peer review only

1  
2  
3  
4  
5  
6  
7  
8  
9  
10  
11  
12  
13  
14  
15  
16  
17  
18  
19  
20  
21  
22  
23  
24  
25  
26  
27  
28  
29  
30  
31  
32  
33  
34  
35  
36  
37  
38  
39  
40  
41  
42  
43  
44  
45  
46  
47  
48  
49  
50  
51  
52  
53  
54  
55  
56  
57  
58  
59  
60

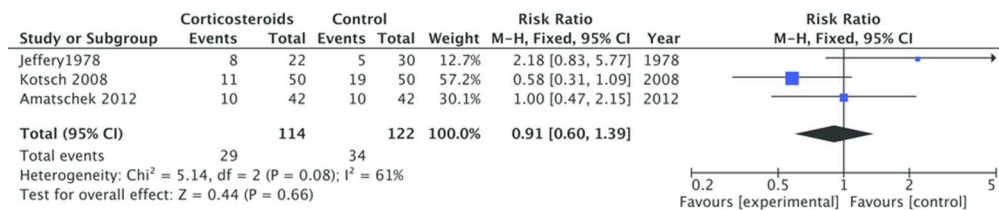

41x8mm (600 x 600 DPI)

For peer review only

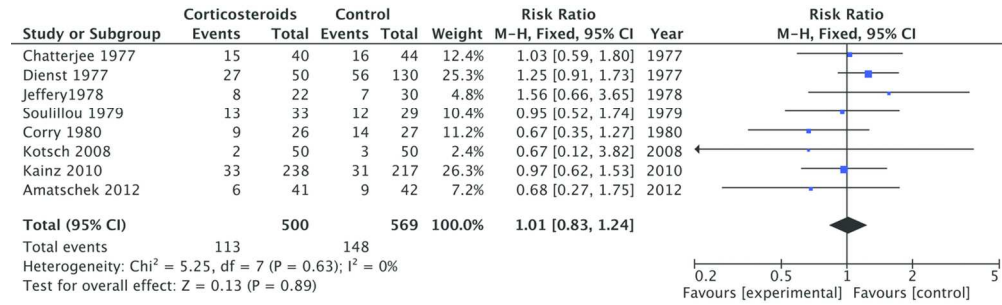

59x18mm (600 x 600 DPI)

## APPENDIX 1: Search Strategy Medline

1. steroids/ or steroids, brominated/ or steroids, chlorinated/ or beclomethasone/ or chlormadinone acetate/ or cyproterone/ or cyproterone acetate/ or steroids, fluorinated/ or betamethasone/ or betamethasone 17-valerate/ or clobetasol/ or dexamethasone/ or desoximetasone/ or dexamethasone isonicotinate/ or flumethasone/ or fluocinolone acetonide/ or fluocinonide/ or fluocortolone/ or diflucortolone/ or fluorometholone/ or fluoxymesterone/ or fluprednisolone/ or flurandrenolone/ or flurogestone acetate/ or paramethasone/ or triamcinolone/ or triamcinolone acetonide/ or steroids, heterocyclic/ or azasteroids/ or finasteride/
2. glucocorticoids/ or beclomethasone/ or betamethasone/ or betamethasone 17-valerate/ or budesonide/ or clobetasol/ or desoximetasone/ or dexamethasone/ or dexamethasone isonicotinate/ or diflucortolone/ or flumethasone/ or fluocinolone acetonide/ or fluocinonide/ or fluocortolone/ or fluorometholone/ or fluprednisolone/ or flurandrenolone/ or melengestrol acetate/ or methylprednisolone/ or methylprednisolone hemisuccinate/ or paramethasone/ or prednisolone/ or prednisone/ or triamcinolone/ or triamcinolone acetonide/
3. anti-inflammatory agents/ or algestone acetophenide/ or beclomethasone/ or benzydamine/ or betamethasone/ or betamethasone 17-valerate/ or budesonide/ or clobetasol/ or corticosterone/ or cortisone/ or desonide/ or desoximetasone/ or dexamethasone/ or dexamethasone isonicotinate/ or diflucortolone/ or fludrocortisone/ or flufenamic acid/ or flumethasone/ or fluocinolone acetonide/ or fluocinonide/ or fluocortolone/ or fluorometholone/ or fluprednisolone/ or flurandrenolone/ or hydrocortisone/ or methylprednisolone/ or methylprednisolone hemisuccinate/ or nedocromil/ or paramethasone/ or prednisolone/ or prednisone/ or tilorone/ or triamcinolone/ or triamcinolone acetonide/
4. glucocorticoid\*.ti,ab.
5. methylprednisolone.ti,ab.
6. hydrocortisone.ti,ab.
7. dexamethasone.ti,ab.
8. corticosteroid.ti,ab.
9. medrol.mp.
10. or/1-9
11. "tissue and organ procurement"/ or directed tissue donation/ or donor selection/
12. Transplantation/ or unrelated donors/
13. Organ transplantation/ or heart transplantation/ or heart-lung transplantation/ or kidney transplantation/ or liver transplantation/ or lung transplantation/or pancreas transplantation
14. donor management.mp
15. "tissue and organ harvesting"/or donor selection/
16. organ harvesting.mp.
17. donor pretreatment.mp
18. organ donor.mp
19. organ donation.mp.
20. organ donation\*.ti,ab.

- 1
- 2
- 3 21. organ transplantation/
- 4 22. or/11-21
- 5 23. brain death/
- 6 24. (brain adj1 (death or dead or deads)).mp.
- 7 25. irreversible coma.mp
- 8 26. coma depasse.mp
- 9 27. (neurologic\*adj1 (death or Dead or deads)).mp.
- 10 28. deceased.mp
- 11 29. or/23-28
- 12 30.10 and 22 and 29
- 13 31.brain Dead donor\*.mp.
- 14 32.deceased donor\*.mp.
- 15 33.31 or 32
- 16 34.10 and 33
- 17 35.30 and 34
- 18 36.(retrieval adj3.donor\*).mp.
- 19 37.organ harvesting.mp.
- 20 38.organ donation.ti,ab.
- 21 39.organ donor\*.mp.
- 22 40.(potential adj3 donors\*).mp.
- 23 41.or/36-40
- 24 42.10 and 41
- 25 43.30 or 34 aor 42
- 26 44.Animals/
- 27 45.Humans/
- 28 46.44 not (44 and 45)
- 29 47.43 not 46
- 30 48.Methylprednisolone Therapy in Deceased Donors Reduces.m\_titl.
- 31 49.Early donor management increases the retrieval rate of lungs.m\_titl.
- 32 50.Steroid pretreatment of organ donors to prevent postischemic.m\_titl.
- 33 51.The haemodynamic effects of adjunctive hormone therapy in potential heart.m\_titl.
- 34 52.or/ 8-51
- 35 53.43 or 52
- 36
- 37
- 38
- 39
- 40
- 41
- 42
- 43
- 44
- 45
- 46
- 47
- 48
- 49
- 50
- 51
- 52
- 53
- 54
- 55
- 56
- 57
- 58
- 59
- 60

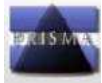

# PRISMA 2009 Checklist

| Section/topic                      | #  | Checklist item                                                                                                                                                                                                                                                                                              | Reported on page # |
|------------------------------------|----|-------------------------------------------------------------------------------------------------------------------------------------------------------------------------------------------------------------------------------------------------------------------------------------------------------------|--------------------|
| <b>TITLE</b>                       |    |                                                                                                                                                                                                                                                                                                             |                    |
| Title                              | 1  | Identify the report as a systematic review, meta-analysis, or both.                                                                                                                                                                                                                                         | 1                  |
| <b>ABSTRACT</b>                    |    |                                                                                                                                                                                                                                                                                                             |                    |
| Structured summary                 | 2  | Provide a structured summary including, as applicable: background; objectives; data sources; study eligibility criteria, participants, and interventions; study appraisal and synthesis methods; results; limitations; conclusions and implications of key findings; systematic review registration number. | 2                  |
| <b>INTRODUCTION</b>                |    |                                                                                                                                                                                                                                                                                                             |                    |
| Rationale                          | 3  | Describe the rationale for the review in the context of what is already known.                                                                                                                                                                                                                              | 3                  |
| Objectives                         | 4  | Provide an explicit statement of questions being addressed with reference to participants, interventions, comparisons, outcomes, and study design (PICOS).                                                                                                                                                  | 3                  |
| <b>METHODS</b>                     |    |                                                                                                                                                                                                                                                                                                             |                    |
| Protocol and registration          | 5  | Indicate if a review protocol exists, if and where it can be accessed (e.g., Web address), and, if available, provide registration information including registration number.                                                                                                                               | S2                 |
| Eligibility criteria               | 6  | Specify study characteristics (e.g., PICOS, length of follow-up) and report characteristics (e.g., years considered, language, publication status) used as criteria for eligibility, giving rationale.                                                                                                      | 4                  |
| Information sources                | 7  | Describe all information sources (e.g., databases with dates of coverage, contact with study authors to identify additional studies) in the search and date last searched.                                                                                                                                  | 4                  |
| Search                             | 8  | Present full electronic search strategy for at least one database, including any limits used, such that it could be repeated.                                                                                                                                                                               | S1                 |
| Study selection                    | 9  | State the process for selecting studies (i.e., screening, eligibility, included in systematic review, and, if applicable, included in the meta-analysis).                                                                                                                                                   | 5                  |
| Data collection process            | 10 | Describe method of data extraction from reports (e.g., piloted forms, independently, in duplicate) and any processes for obtaining and confirming data from investigators.                                                                                                                                  | 5                  |
| Data items                         | 11 | List and define all variables for which data were sought (e.g., PICOS, funding sources) and any assumptions and simplifications made.                                                                                                                                                                       | 5                  |
| Risk of bias in individual studies | 12 | Describe methods used for assessing risk of bias of individual studies (including specification of whether this was done at the study or outcome level), and how this information is to be used in any data synthesis.                                                                                      | 5                  |
| Summary measures                   | 13 | State the principal summary measures (e.g., risk ratio, difference in means).                                                                                                                                                                                                                               | 5                  |
| Synthesis of results               | 14 | Describe the methods of handling data and combining results of studies, if done, including measures of consistency (e.g., $I^2$ ) for each meta-analysis.                                                                                                                                                   | 5                  |

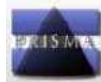

# PRISMA 2009 Checklist

Page 1 of 2

| Section/topic                 | #  | Checklist item                                                                                                                                                                                           | Reported on page # |
|-------------------------------|----|----------------------------------------------------------------------------------------------------------------------------------------------------------------------------------------------------------|--------------------|
| Risk of bias across studies   | 15 | Specify any assessment of risk of bias that may affect the cumulative evidence (e.g., publication bias, selective reporting within studies).                                                             | 5                  |
| Additional analyses           | 16 | Describe methods of additional analyses (e.g., sensitivity or subgroup analyses, meta-regression), if done, indicating which were pre-specified.                                                         | 5                  |
| <b>RESULTS</b>                |    |                                                                                                                                                                                                          |                    |
| Study selection               | 17 | Give numbers of studies screened, assessed for eligibility, and included in the review, with reasons for exclusions at each stage, ideally with a flow diagram.                                          | 6                  |
| Study characteristics         | 18 | For each study, present characteristics for which data were extracted (e.g., study size, PICOS, follow-up period) and provide the citations.                                                             | 6                  |
| Risk of bias within studies   | 19 | Present data on risk of bias of each study and, if available, any outcome level assessment (see item 12).                                                                                                | 7                  |
| Results of individual studies | 20 | For all outcomes considered (benefits or harms), present, for each study: (a) simple summary data for each intervention group (b) effect estimates and confidence intervals, ideally with a forest plot. | 8                  |
| Synthesis of results          | 21 | Present results of each meta-analysis done, including confidence intervals and measures of consistency.                                                                                                  | 8                  |
| Risk of bias across studies   | 22 | Present results of any assessment of risk of bias across studies (see Item 15).                                                                                                                          | 8                  |
| Additional analysis           | 23 | Give results of additional analyses, if done (e.g., sensitivity or subgroup analyses, meta-regression [see Item 16]).                                                                                    | NA                 |
| <b>DISCUSSION</b>             |    |                                                                                                                                                                                                          |                    |
| Summary of evidence           | 24 | Summarize the main findings including the strength of evidence for each main outcome; consider their relevance to key groups (e.g., healthcare providers, users, and policy makers).                     | 10                 |
| Limitations                   | 25 | Discuss limitations at study and outcome level (e.g., risk of bias), and at review-level (e.g., incomplete retrieval of identified research, reporting bias).                                            | 11                 |
| Conclusions                   | 26 | Provide a general interpretation of the results in the context of other evidence, and implications for future research.                                                                                  | 13                 |
| <b>FUNDING</b>                |    |                                                                                                                                                                                                          |                    |
| Funding                       | 27 | Describe sources of funding for the systematic review and other support (e.g., supply of data); role of funders for the systematic review.                                                               | 14                 |

From: Moher D, Liberati A, Tetzlaff J, Altman DG, The PRISMA Group (2009). Preferred Reporting Items for Systematic Reviews and Meta-Analyses: The PRISMA Statement. PLoS Med 6(7): e1000097. doi:10.1371/journal.pmed1000097

For more information, visit: [www.prisma-statement.org](http://www.prisma-statement.org).

Page 2 of 2

For peer review only - <http://bmjopen.bmj.com/site/about/guidelines.xhtml>



# BMJ Open

## Effect of Corticosteroid Administration on Neurologically Deceased Organ Donors and Transplant Recipients : A Systematic Review and Meta-Analysis

|                                 |                                                                                                                                                                                                                                                                                                                                                                                                                                                                                                                                                                                                                                                                                                                                                                                        |
|---------------------------------|----------------------------------------------------------------------------------------------------------------------------------------------------------------------------------------------------------------------------------------------------------------------------------------------------------------------------------------------------------------------------------------------------------------------------------------------------------------------------------------------------------------------------------------------------------------------------------------------------------------------------------------------------------------------------------------------------------------------------------------------------------------------------------------|
| Journal:                        | <i>BMJ Open</i>                                                                                                                                                                                                                                                                                                                                                                                                                                                                                                                                                                                                                                                                                                                                                                        |
| Manuscript ID                   | bmjopen-2016-014436.R2                                                                                                                                                                                                                                                                                                                                                                                                                                                                                                                                                                                                                                                                                                                                                                 |
| Article Type:                   | Research                                                                                                                                                                                                                                                                                                                                                                                                                                                                                                                                                                                                                                                                                                                                                                               |
| Date Submitted by the Author:   | 14-Apr-2017                                                                                                                                                                                                                                                                                                                                                                                                                                                                                                                                                                                                                                                                                                                                                                            |
| Complete List of Authors:       | D'Aragon, Frédéric; Université de Sherbrooke Faculté de médecine et des sciences de la santé, Anesthesiology; Centre de recherche du CHUS, Belley-Côté, Émilie; McMaster University, Department of Health Research Methods, Evidence and Impact (HEI)<br>Agarwal, Arnav; McMaster University, Department of Health Research Methods, Evidence and Impact (HEI); University of Toronto Faculty of Medicine<br>Frenette, Anne-Julie; Université de Montréal<br>Lamontagne, Françoise; Université de Sherbrooke,<br>Guyatt, Gordon; McMaster University, Department of Health Research Methods, Evidence and Impact (HEI)<br>Dhanani, Sonny; University of Ottawa, Critical Care<br>Meade, Maureen; McMaster University, Department of Health Research Methods, Evidence and Impact (HEI) |
| <b>Primary Subject Heading</b>: | Intensive care                                                                                                                                                                                                                                                                                                                                                                                                                                                                                                                                                                                                                                                                                                                                                                         |
| Secondary Subject Heading:      | Surgery, Pharmacology and therapeutics                                                                                                                                                                                                                                                                                                                                                                                                                                                                                                                                                                                                                                                                                                                                                 |
| Keywords:                       | INTENSIVE & CRITICAL CARE, tissus and organ procurement, TRANSPLANT MEDICINE, Graft rejection, Methylprednisolone, Brain death                                                                                                                                                                                                                                                                                                                                                                                                                                                                                                                                                                                                                                                         |
|                                 |                                                                                                                                                                                                                                                                                                                                                                                                                                                                                                                                                                                                                                                                                                                                                                                        |

SCHOLARONE™  
Manuscripts

1  
2  
3 **EFFECT OF CORTICOSTEROID ADMINISTRATION ON NEUROLOGICALLY**  
4 **DECEASED ORGAN DONORS AND TRANSPLANT RECIPIENTS : A SYSTEMATIC**  
5 **REVIEW AND META-ANALYSIS**  
6  
7  
8

9  
10 **My manuscript is submitted as an original works:**

11  
12 **Authors:**

13  
14 Frederick D'Aragn, M.D.<sup>1,4</sup>; Emilie Belley-Cote, M.D.<sup>1</sup>; Arnav Agarwal, BSc<sup>1,2</sup>; Anne-  
15 Julie Frenette, MSc<sup>3</sup>; Francois Lamontagne, M.D., MSc<sup>4</sup>; Gordon Guyatt, M.D., MSc<sup>1,6</sup>;  
16  
17 Sonny Dhanani, M.D.<sup>5</sup>; Maureen O. Meade, M.D., MSc<sup>1,6</sup>  
18  
19

20  
21 **Affiliations:**

22  
23 <sup>1</sup>Department of Clinical Epidemiology and Biostatistics, McMaster University, Hamilton,  
24 Ontario, Canada  
25

26  
27 <sup>2</sup>Faculty of Medicine, University of Toronto, Toronto, Ontario, Canada, L8S 4K1  
28

29  
30 <sup>3</sup>University of Montreal, Faculty of Pharmacy ; Hopital Sacre Cœur de Montreal,  
31 Montréal, Québec, Canada, H3C 3J7  
32

33  
34 <sup>4</sup>Centre de Recherche du Centre Hospitalier Universitaire de Sherbrooke et Faculté de  
35 médecine et des sciences de la santé, □ Université de Sherbrooke, Sherbrooke, Québec,  
36 Canada, J1H 5N4  
37

38  
39 <sup>5</sup>Critical Care, Children's Hospital of Eastern Ontario; Associate Professor, Department  
40 of Medicine, University of Ottawa, K1H 8L1  
41

42  
43 <sup>6</sup>Departments of Medicine, McMaster University, Hamilton, Ontario, Canada, L8S 4K1  
44

45  
46  
47 **Corresponding author:**

48  
49 Frederick D'Aragn

50  
51 Faculty of Medicine & Health Sciences , University of Sherbrooke

52  
53 3001 12<sup>e</sup> ave North  
54  
55

1  
2  
3 Sherbrooke, Canada

4  
5 J1H 5N4

6  
7 frederick.daragon@usherbrooke.ca

8  
9  
10 819-346-1110 ext 13905

11  
12  
13 **Word Count** : 3025 words

14  
15  
16  
17  
18 **ABSTRACT**

19  
20 **Objectives** : This review investigates the impact of corticosteroids on donation rates  
21 and transplant outcomes in light of findings from randomized controlled trials (RCTs) and  
22 to highlight the sources of uncertainty in this unresolved donor management issue.  
23  
24  
25

26  
27  
28 **Data Sources** : We searched electronic databases, trial registries, and conference  
29 proceedings for RCTs evaluating corticosteroid therapy in neurologically deceased  
30 donors.  
31  
32  
33

34  
35 **Study Selection & Data Extraction** : Independent reviewers assessed eligibility,  
36 evaluated risk of bias, and abstracted data, including donor hemodynamic data, number  
37 of organs recovered, and transplant outcomes. Where possible, we pooled results. For  
38 each outcome we assessed the overall quality of evidence using GRADE methodology.  
39  
40  
41  
42  
43

44  
45 **Data Synthesis**: Eleven RCTs with different corticosteroid regimens were included.  
46 Most trials assessed a once-daily infusion of methylprednisolone. Aside from one study  
47 showing improved liver graft function, no individual study or pooled analysis showed  
48 benefit of corticosteroids for any outcome: vasopressor use (3 trials; relative risk [RR]  
49 0.96; 95% confidence interval [CI] 0.89 to 1.05), multiple organs recovered (2 trials; RR  
50  
51  
52  
53  
54  
55  
56  
57  
58  
59  
60

1  
2  
3 0.82; 95% CI 0.61 to 1.11), acute graft rejection (3 trials; RR 0.91; 95% CI 0.60 to 1.39)  
4  
5 or graft dysfunction (8 trials; RR 1.01; 95% CI 0.83 to 1.24). Two trials investigated  
6  
7 adverse effects and found similar rates between groups. Quality of evidence was  
8  
9 moderate or low for all outcomes.  
10

11  
12 **Conclusion :** Current clinical trials are limited in numbers and size to identify benefits  
13  
14 or harms of corticosteroid therapy for deceased organ donors. In the face of these  
15  
16 results, administering or withholding steroids both appear reasonable courses of action.  
17  
18  
19  
20  
21  
22

### 23 **STRENGTHS AND LIMITATIONS**

24  
25 An exhaustive search strategy and strict adherence to systematic review methodology  
26  
27 make this review the most rigorous on the topic.  
28

29  
30 Our comprehensive GRADE approach improves the transparency regarding the quality  
31  
32 of the available evidence on the effect of steroids in potential organ donors.  
33

34  
35 Available data only allows for limited inference on the effects of steroid on graft outcome  
36  
37 due to varied definitions of graft outcomes.  
38

39  
40 The clinical relevance of our results is limited by the inability to assess for differences in  
41  
42 steroid effects associated with variations in dose or timing of administration.  
43  
44  
45  
46  
47  
48  
49  
50  
51  
52  
53  
54  
55  
56  
57  
58  
59  
60

## INTRODUCTION

For patients with end-stage organ dysfunction, transplantation is a life-saving intervention. Universally, organs available for transplantation are insufficient to meet population needs.<sup>(1)</sup> Optimal medical management of deceased organ donors may help to address this shortage.<sup>(2, 3)</sup>

In the process that culminates in neurological death, cerebral herniation can induce a catecholamine storm that, when severe, leads to cardiovascular collapse. Hemodynamic instability of any degree threatens the viability of potentially recoverable organs<sup>(4)</sup> and disturbances in the hypothalamo-pituitary-adrenal axis can be an important contributor.<sup>(5)</sup> Though the prevalence of adrenal insufficiency among neurologically deceased organ donors is uncertain,<sup>(6-9)</sup> corticosteroid therapy may alleviate hemodynamic collapse during cerebral herniation.

Cerebral herniation also activates a systemic inflammatory response; thus, anti-inflammatory properties of corticosteroid offer another potential mechanism of benefit.<sup>(10, 11)</sup> Intuitively, inflammation will jeopardize the suitability of organs for transplantation, but prospective cohort studies have generated conflicting results.<sup>(12-14)</sup>

In theory, treatment of potential organ donors with corticosteroids could improve their hemodynamic status, improve organ suitability and attenuate post-transplant organ dysfunction. The *Society of Critical Care Medicine*, the *American College of Chest Physicians*, and the *Association of Organ Procurement Organizations*, recommend high-dose corticosteroid for organ donation following neurological death.<sup>(15)</sup> One recent systematic review addressing this topic concluded that existing research neither confirms nor refutes the efficacy of corticosteroid therapy for neurologically deceased donors.<sup>(16)</sup> To advance this field, we applied GRADE methodology to further define the

1  
2  
3 quality of current evidence, the specific limitations of previously reported trials, and  
4  
5 future research needed to clarify the effects of systemic corticosteroid therapy in  
6  
7 neurologically deceased donors.<sup>(17)</sup>  
8  
9

## 10 11 12 **METHODS**

13  
14 This manuscript was drafted in accordance with the PRISMA guidelines on reporting  
15  
16 of systematic review and meta-analyses.<sup>(18)</sup>  
17  
18

### 19 **Eligibility Criteria**

20  
21 We included published and unpublished randomized controlled trials (RCTs)  
22  
23 enrolling of children and adults neurologically deceased potential organ donors and  
24  
25 comparing corticosteroids to placebo, to no administration of corticosteroids, or to other  
26  
27 active treatments. We focused on the following outcomes: 1) vasopressor requirement  
28  
29 among donors; 2) organ recovery from donors; 3) recipient graft rejection; 4) recipient  
30  
31 graft dysfunction (using individual study definitions); and 5) adverse effects of  
32  
33 corticosteroids in donors and recipients.  
34  
35  
36

### 37 **Search Strategy**

38  
39 With the assistance of a medical librarian we searched MEDLINE, EMBASE and  
40  
41 Cochrane Central from their inception to January 2017. The MEDLINE search strategy is  
42  
43 found in Appendix 1. We searched conference proceedings from the *International*  
44  
45 *Society of Organ Donation and Procurement*, *American Transplant Congress*, the  
46  
47 *Canadian Society of Transplantation*, the *Society of Critical Care Medicine*, and the  
48  
49 *Canadian Critical Care Forum* over five years, as well as clinical trial registries, and we  
50  
51 screened the reference lists of all relevant articles.  
52  
53  
54

### 55 **Eligibility Review and Data Abstraction**

56  
57  
58  
59  
60

1  
2  
3 Two reviewers independently screened citations and evaluated the full text of  
4 potentially eligible studies in duplicate, then abstracted data onto customized, pre-tested  
5 forms. Disagreements between reviewers were resolved through discussion or third  
6 party adjudication. We abstracted data pertaining to study characteristics and design,  
7 population, intervention, comparison and all clinical outcomes. We clarified missing data  
8 through email correspondence with the study author.  
9

### 16 **Assessment of Risk of Bias (single studies) and Quality of Evidence (entire body** 17 **of evidence)** 18 19

20  
21 For each study two reviewers evaluated the risk of bias using the Cochrane  
22 Collaboration tool for RCTs.<sup>(19)</sup> The risk of bias was judge to be at low risk, high risk or  
23 unclear risk with the following domains: treatment allocation, sequence generation and  
24 concealment, blinding, completeness of follow-up, selective outcome reporting and other  
25 potential sources of bias.  
26  
27

28 For each outcome, using GRADE methodology, we evaluated the quality of the entire  
29 body of evidence as high, moderate, low or very low,<sup>(17)</sup> The GRADE system considers  
30 each of the following: overall risk of bias,<sup>(20)</sup> imprecision in estimates of effect,<sup>(21)</sup>  
31 inconsistency in findings across studies,<sup>(22)</sup> indirectness (the extent to which individual  
32 study populations, interventions, and outcome measurements deviate from those of  
33 interest to this review)<sup>(23)</sup> and publication bias.<sup>(24)</sup>  
34  
35

### 36 **Statistical Analyses** 37 38

39 We calculated chance-corrected agreement for eligibility decisions using the kappa  
40 statistic.<sup>(19)</sup> Dichotomous outcomes are reported as relative risks (RR) with their  
41 respective 95% confidence interval (CI) for a two-sided comparison. For pooled  
42 analyses, using Revman software version 5.2 (Copenhagen), we chose a fixed effect  
43  
44  
45  
46  
47  
48  
49  
50  
51  
52  
53  
54  
55  
56  
57  
58  
59  
60

1  
2  
3 rather than a random effect model because estimates of between-study variability are  
4 necessary for random effects estimates and are uncertain when, as in this context, there  
5 are few studies.<sup>(19)</sup> If graft outcomes were measured at more than one interval we used  
6 the shortest one, assuming that steroid effects, if any, would manifest early.  
7 Heterogeneity was measured using the chi square test for homogeneity and the  
8 Cochran  $I^2$ .<sup>(19)</sup>  $I^2$  greater than 50% was considered significant heterogeneity. The Egger  
9 test to address publication bias was not performed as less than 10 studies were  
10 identified.  
11  
12  
13  
14  
15  
16  
17  
18  
19  
20  
21  
22  
23

## 24 RESULTS

### 25 Study selection

26 From 4352 citations, 11 were eligible (Figure 1).<sup>(25-35)</sup> Between-reviewer agreement  
27 at the level of full text review was perfect ( $\kappa = 1$ ). Ten studies were published in  
28 English<sup>(25, 26, 28-35)</sup> and one in French.<sup>(27)</sup>  
29  
30  
31  
32  
33  
34

### 35 Study characteristics

36 Five out of 11 studies explicitly mentioned Ethics Review Board approval, and fewer  
37 detailed the approach to research consent.<sup>(26, 28-30, 35)</sup> Four publications with a focus on  
38 recipient outcomes reported separately for different organs from the same donors.  
39 Specifically, one trial was reported in two distinct publications addressing outcome  
40 related to the kidney<sup>(26)</sup> and to the liver respectively.<sup>(30)</sup> A second trial of a single donor  
41 cohort reported separately on outcomes related to lung<sup>(36)</sup> and heart.<sup>(28)</sup>  
42  
43  
44  
45  
46  
47  
48  
49  
50

51 Four publications did not state the number of donors enrolled, because recipient  
52 outcomes were the focus.<sup>(16, 31-34)</sup> When reported, the number of donors ranged from 40  
53 to 269, and baseline characteristics were similar between study groups.<sup>(26, 28-30, 35)</sup> The  
54  
55  
56  
57  
58  
59  
60



1  
2  
3 mean donor age varied from 30 to 40 years. The most common cause for neurological  
4 death was vascular injury (e.g. stroke, subarachnoid hemorrhage), followed by traumatic  
5 brain injury.<sup>(26, 28, 35)</sup>  
6  
7  
8  
9

10 Participants in these studies also included transplant recipients in the eight trials  
11 reporting on transplant outcomes, of whom there were 885 kidney recipients and 183  
12 liver recipients.<sup>(25, 26, 29-34)</sup> Their baseline characteristics were reported in only three  
13 publications.<sup>(26, 29, 30)</sup> Groups were similar and liver recipients had favourable prognosis  
14 at baseline with a mean Model For End-Stage Liver Disease (MELD) score between 14  
15 and 16.<sup>(29, 30)</sup> Two studies measured graft outcome only among patients transplanted in  
16 the participating organ donation centre and excluded all recipients transplanted in other  
17 facilities.<sup>(29, 31)</sup>  
18  
19  
20  
21  
22  
23  
24  
25  
26  
27

28 Table 1 presents the study corticosteroid regimens. A single intravenous dose of  
29 methylprednisolone was the most common regimen, ranging in dose from 1 gram to 5  
30 grams. Three trials tested corticosteroid therapy in isolation,<sup>(26, 29, 30)</sup> two others  
31 evaluated corticosteroids in a factorial design with liothyronine,<sup>(28, 35)</sup> one as part of  
32 combined hormonal therapy with liothyronine<sup>(27)</sup> and five placebo-controlled trials  
33 administered corticosteroids in combination with cyclophosphamide.<sup>(25, 31-34)</sup> The timing  
34 of corticosteroid therapy also varied across studies. Corticosteroids were administered  
35 30 to 60 minutes after death declaration in one study,<sup>(27)</sup> immediately after consent for  
36 organ donation in three studies,<sup>(28, 29, 35)</sup> and three to eight hours before surgery in seven  
37 studies.<sup>(25, 26, 30-34)</sup> In most studies, methylprednisolone was dosed every 24 hours.<sup>(25, 26,  
38 28, 30-35)</sup>  
39  
40  
41  
42  
43  
44  
45  
46  
47  
48  
49  
50  
51  
52  
53  
54  
55  
56  
57  
58  
59  
60

**Table 1: Prospective Randomized Trials of Steroids Administration in Neurologically Dead Donors- Summary of the Studies**

| Author, Year                        | Donors/<br>Recipients<br>(n) | Organs<br>Recovered | Experimental<br>Intervention                                                                                           | Control<br>intervention |
|-------------------------------------|------------------------------|---------------------|------------------------------------------------------------------------------------------------------------------------|-------------------------|
| <b>Parallel Design</b>              |                              |                     |                                                                                                                        |                         |
| Chatterjee, 1977 <sup>(25)</sup>    | 50<br>84                     | Kidney              | MTP 5 g IV single dose after brain death confirmation                                                                  | Usual care              |
| Dienst, 1977 <sup>(32)</sup>        | NR<br>106                    | Kidney              | MTP 3 g IV + Cy 3 g IV single doses 5-8 hrs. before organ recovery                                                     | Usual care              |
|                                     | NR<br>45                     |                     | MTP 5 g IV + Cy 3 g IV single doses 5-8 hrs. before organ recovery                                                     | Usual care              |
|                                     | NR<br>29                     |                     | MTP 5 g IV + Cy 5 g IV single doses 5-8 hrs. before organ recovery                                                     | Placebo                 |
| Jeffery, 1978 <sup>(33)</sup>       | NR<br>52                     | Kidney              | MTP 5 g IV +Cy 7 g IV single doses $\geq$ 4 hrs. before organ recovery                                                 | Usual care              |
| Souillou, 1979 <sup>(34)</sup>      | NR<br>62                     | Kidney              | MTP 5 g IV + Cy 5 g IV single doses $\geq$ 5 hrs. before organ recovery                                                | Placebo                 |
| Corry, 1980 <sup>(31)</sup>         | NR<br>52                     | Kidney              | MTP 60 mg/kg IV +Cy 80 mg/kg IV single doses $\geq$ 5 hrs. before organ recovery                                       | Usual care              |
| Mariot, 1980 <sup>(27)</sup>        | 40<br>NR                     | Multi-organs        | Hydrocortisone 100 mg IV+ T <sub>3</sub> 2 mcg IV after brain death confirmation q.30-60 min. until stable CVP and SBP | Placebo                 |
| Kotsch, 2008 <sup>(29)</sup>        | 100<br>100                   | Liver               | MTP 250 mg IV + 100 mg/h IV after brain death confirmation                                                             | Usual care              |
| Kainz, 2010 <sup>(26)</sup>         | 269<br>455                   | Kidney              | MTP 1 g single dose $\geq$ 3 hrs. before organ recovery                                                                | Placebo                 |
| Amatschek, 2012 <sup>(30)</sup>     | 8390<br>83                   | Liver               | MTP 1 g single dose $\geq$ 3 hrs. before organ recovery                                                                | Placebo                 |
| <b>Factorial Design</b>             |                              |                     |                                                                                                                        |                         |
| Venkateswaran, 2008 <sup>(35)</sup> | 60<br>NR                     | Lung                | MTP 1 g IV single dose +/- T <sub>3</sub> 0.8 ug/kg +0.113 ug/kg/hr IV after brain death confirmation                  | Placebo                 |
| Venkateswaran, 2009 <sup>(28)</sup> | 80<br>NR                     | Heart               | MTP 1 g IV single dose +/- T <sub>3</sub> 0.8 ug/kg +0.113 ug/kg/hr IV after brain death confirmation                  | Placebo                 |

Legend : CVP= Central Venous Pressure, Cy = Cyclophosphamide, MTP = Methylprednisolone, NR = Not Reported, SBP = Systolic Blood Pressure, T<sub>3</sub>= Liothyronin

## Risk of bias of individual studies

Using the Cochrane tool,<sup>(19)</sup> four RCTs published after 1995 had low risk of bias.<sup>(26-30,</sup>  
<sup>35)</sup> Earlier trials reported insufficient information to evaluate risk of bias (Figure 2).<sup>(25, 31-34)</sup>

## Results of individual studies and pooled results

### *Vasopressor requirement*

The three studies (n = 452 donors) that reported on vasopressor administration most commonly used norepinephrine.<sup>(26, 29, 30)</sup> Individually and when pooled, corticosteroid did not influence the rate of vasopressor use in these studies (pooled RR 0.96; 95% CI 0.89 to 1.05; moderate quality) (Figure 3). The GRADE quality of evidence was rated down to moderate quality primarily because this outcome was relatively susceptible to lack of blinding (Table 2).

### *Organ recovery*

Four trials evaluated organ recovery rates, but these data were analysed and reported differently across the four trials. None of the individual trials reported results suggesting increased organ recovery with steroids. Two trials (n = 309 donors) reported on the number of donors that provided multiple organs,<sup>(26, 27)</sup> and the pooled estimate suggested no effect of corticosteroids but with a very wide confidence interval including substantial benefit (RR 0.82; 95% CI 0.61 to 1.11; moderate quality) (Figure 4). Similarly, in a factorial RCT, investigators did not demonstrate a significant increase in the number of hearts recovered or suitable for transplantation.<sup>(28)</sup> In a *post hoc* analysis, Venkateswaran observed a decrease in the extravascular lung water index with the administration of corticosteroids; this could potentially increase the number of lungs suitable for transplantation if taken into consideration during donor care. (35) For this

1  
2  
3  
4  
5  
6  
7  
8  
9  
10  
11  
12  
13  
14  
15  
16  
17  
18  
19  
20  
21  
22  
23  
24  
25  
26  
27  
28  
29  
30  
31  
32  
33  
34  
35  
36  
37  
38  
39  
40  
41  
42  
43  
44  
45  
46  
47  
48  
49  
50  
51  
52  
53  
54  
55  
56  
57  
58  
59  
60

group of outcomes, we rated down the quality of evidence to moderate because of imprecision (wide confidence intervals) (Table 2).

For peer review only

Table 2: GRADE Profile

| Quality assessment |              |                      |                      |                          |                      |                      | Quality         |
|--------------------|--------------|----------------------|----------------------|--------------------------|----------------------|----------------------|-----------------|
| No of studies      | Study design | Risk of bias         | Inconsistency        | Indirectness             | Imprecision          | Other considerations |                 |
| 3                  | RCT          | serious <sup>a</sup> | not serious          | not serious              | not serious          | none                 | ⊕⊕⊕<br>MODERATE |
| 2                  | RCT          | not serious          | not serious          | not serious              | serious <sup>b</sup> | none                 | ⊕⊕⊕<br>MODERATE |
| 3                  | RCT          | not serious          | serious <sup>c</sup> | not serious              | serious <sup>b</sup> | none                 | ⊕⊕<br>LOW       |
| 8                  | RCT          | serious <sup>d</sup> | not serious          | serious <sup>e,f,g</sup> | not serious          | none                 | ⊕⊕<br>LOW       |

RCT= Randomized Clinical Trial, RR= Relative Risk

*a* =Lack of blinding, *b* = Wide confidence interval suggesting appreciable harm or benefit, *c* = Large variation in effect, *d* large, *d* = Selection bias.

*e* = Different definition of the same outcome, *f* = Surrogate outcomes used to describe graft function, *g* = Co intervention.

### *Transplant outcomes (acute graft rejection and graft function)*

Three trials (n = 235 recipients) studied acute graft rejection.<sup>(29, 30, 33)</sup> Trials on acute liver rejection reported conflicting results.<sup>(29, 30)</sup> Amatschek et al. reported similar risks of acute rejection as measured from routine biopsy specimens at three months.<sup>(30)</sup> However, Kotsch et al. obtained a lower rate of acute rejection, in the corticosteroid group, on routine biopsies within the first six months.<sup>(29)</sup> Jeffery et al. did not find a reduction in the number of acute kidney rejection with corticosteroids within the first year.<sup>(33)</sup> Episodes of rejection were diagnosed on the basis of an increase in serum creatinine of more than 0.2 mg/100ml, clinical findings and absence of alternative diagnosis explaining worsening renal function. Pooled estimates do not suggest that corticosteroids reduce the risk of acute graft rejection (RR 0.91; 95% CI 0.60 to 1.39; low confidence) (Figure 5). For this group of outcomes, we rated down the overall quality of evidence to low because of inconsistency (large variation in effect between studies) and imprecision (Table 2).

Of the eight RCTs (n = 1068 recipients) that evaluated graft outcomes,<sup>(25, 26, 29-34)</sup> two trials provided conflicting results on liver graft function. Kotsch et al. reported a reduction in transaminase levels within the ten days after transplantation among patients receiving corticosteroid therapy.<sup>(29)</sup> In contrast, Amatschek et al. obtained similar transaminase levels within seven days.<sup>(30)</sup> Six studies compared a composite risk of one or more of the following data: creatinine level, creatinine clearance, dialysis, listed for kidney transplantation or death at different time interval.<sup>(25, 26, 31-34)</sup> Pooled estimates, suggest no effect of corticosteroids on graft function (RR 1.01; 95% CI 0.83 to 1.24; low confidence) (Figure 6). Individual studies had high risk of bias, (lack of blinding and loss to follow up) and also provided only indirect evidence because they combined steroids

1  
2  
3 with cyclophosphamide in the experimental groups. Therefore, we rated the quality of  
4 evidence for this outcome as low (Table 2).  
5  
6

### 7 *Adverse effects*

8  
9  
10 Only two studies evaluated steroid-related adverse events. Investigators reported no  
11 effect on infection rates among donors.<sup>(29)</sup> Bile duct complications and hepatitis C virus  
12 reinfection following liver transplantation were similar between groups.<sup>(29, 30)</sup>  
13  
14  
15  
16  
17  
18

## 19 **DISCUSSION**

20  
21 We systematically reviewed 11 RCTs evaluating the efficacy of corticosteroid therapy  
22 in potential organ donors with respect to clinically important outcomes among both  
23 donors and recipients. Individual studies applied a variety of dosing strategies and study  
24 outcomes, and very few suggested any difference between corticosteroid and control  
25 groups. When two or more studies measured the same outcome, pooled results did not  
26 support a treatment effect for hemodynamic stability, the number of organs recovered,  
27 or transplant function. The overall quality of evidence was moderate or low for these  
28 outcomes, limiting our confidence in the results.  
29  
30  
31  
32  
33  
34  
35  
36  
37  
38  
39

40 Strengths of our study include a comprehensive search, independent duplicate  
41 assessments of study eligibility, risk of bias, and data abstraction, and the pooling of  
42 results across studies where possible. Most importantly, we applied the GRADE system  
43 to rate the quality of evidence for each outcome that was addressed by more than one  
44 study. It provides a transparent assessment of our confidence in the estimates of the  
45 effect of steroids on key clinical outcomes in potential organ donors. The GRADE  
46 assessment is definitely an added value as it will provide knowledge users with  
47 evaluations of the quality of evidence underlying the use of steroids in potential organ  
48  
49  
50  
51  
52  
53  
54  
55  
56  
57  
58  
59  
60

1  
2  
3 donors. In doing so, our goal was to support guidelines for clinical care and to highlight  
4 areas for improving scientific rigor in this field. A primary limitation of this review was the  
5 inability to address differences in effect with different dosing regimens, or between organ  
6 types, based on the small number of studies to support such subgroup analyses.  
7  
8  
9  
10

11  
12 Limitations of our study are largely those of the original studies and thus of the body  
13 of evidence to which they contribute. Applying GRADE methodology, the overall  
14 quality of evidence was rated down as a result of the risk of bias, indirectness of  
15 evidence, inconsistency and imprecision. While the risk of bias among five studies  
16 reported in the past 20 years was relatively low, the risk of bias was uncertain for six  
17 earlier studies, and may be high.<sup>(37)</sup> Risk of bias was related to lack of blinding and  
18 possible selection bias in the unexplained post-randomization exclusion of specific  
19 transplant recipients from some studies.<sup>(29, 31)</sup>  
20  
21  
22  
23  
24  
25  
26  
27  
28  
29  
30

31 Another limitation is that studies did not take the clustering of organs within donors (a  
32 single donor can contribute up to 7 organs) into account in the analysis. To the extent  
33 that organs from some donors do systematically better than organs from other donors,  
34 the confidence intervals presented in the studies are narrower than would be the case in  
35 an analysis that took clustering into account.  
36  
37  
38  
39  
40  
41

42 Indirectness of evidence was another important reason for rating down the overall  
43 quality of evidence. Six studies combining all steroid interventions (but not control  
44 interventions) with other hormone therapies,<sup>(27,34)</sup> or with cyclophosphamide,<sup>(30-33)</sup>  
45 provide only indirect evidence of the potential treatment effects of corticosteroids alone.  
46  
47  
48  
49  
50  
51 Variation in timing of randomization and subsequent administration of study intervention  
52 also have affected treatment effect presuming that later administration (i.e. 5-8 hours  
53 before organ recovery) may be less effective. Indirectness also comes into play when  
54  
55  
56  
57  
58  
59  
60



1  
2  
3 evaluating studies of varied dosing regimens; it is conceivable that the apparent lack of  
4 effect overall is a result of assessing relatively helpful regimens alongside of those that  
5 are relatively harmful.  
6  
7  
8

9  
10 Finally, we also rated down the quality of evidence for two outcomes on the basis of  
11 imprecision. The small number of studies, patients within studies, and events among  
12 patients resulted not only in wide confidence intervals but also precluded subgroup  
13 analyses and assessment for publication bias. In summary, because the quality of  
14 evidence is low for at least two outcomes, this review cannot support strong  
15 recommendations for clinical care.  
16  
17  
18  
19  
20  
21  
22

23  
24 Inferences from this systematic review are also limited by varied outcomes of graft  
25 dysfunction; variable results across outcomes (apparent harm in number of organs  
26 recovered and apparent benefit in graft rejection; varied definitions for each specific  
27 term; and the inability to apply outcome definitions across organ groups, which is  
28 important in this field because one organ donor may donate kidneys, liver, lung, heart,  
29 and/or pancreas or small bowel. For example, outcomes of renal graft function across  
30 studies included graft failure,<sup>(25, 34)</sup> graft survival,<sup>(31, 32)</sup> and delayed graft function.<sup>(26)</sup>  
31 Even the measurement of renal 'graft failure' was problematic for pooling across studies:  
32 Chatterjee et al. defined graft failure as a composite outcome of kidney removal after  
33 transplantation, return to hemodialysis or death,<sup>(25)</sup> while Souillou et al. defined graft  
34 failure as any requirement for hemodialysis or a serum creatinine level (threshold not  
35 specified) after transplantation.<sup>(34)</sup> Unified outcome measures for specific organs, and  
36 potentially generic outcome measures across organ groups, would help to advance the  
37 science of organ donor management.  
38  
39  
40  
41  
42  
43  
44  
45  
46  
47  
48  
49  
50  
51  
52  
53  
54  
55  
56  
57  
58  
59  
60

1  
2  
3 Our results are similar to those previously reported.<sup>(16, 38)</sup> However, we went  
4 beyond prior reviews in conducting meta-analyses and using the GRADE approach for  
5 rating the quality of evidence. Unfortunately, the moderate or low quality of evidence  
6 does not allow strong inferences about the use of steroids in these populations.<sup>(15, 39)</sup>  
7  
8  
9  
10

11  
12 Although observational studies frequently overestimate treatment effects, and these  
13 might have been confounded by surgical interventions, organ preservation techniques  
14 and transplant recipient characteristics, evidence from the current RCTs is also limited in  
15 quality. In a recent European multicentre observational study (n = 259), administration  
16 of corticosteroids to deceased organ donors with a neurological determination of death  
17 was associated with a lower dose of norepinephrine (steroid group [SG] = 1.18 +/- 0.92  
18 mg/h vs control group [CG] = 1.49 +/- 1.29 mg/h, p = 0.03) and shorter duration of  
19 vasopressor support (SG = 874 min vs CG = 1160 min., p < 0.0001).<sup>(40)</sup> The incidence of  
20 delayed graft function among recipients was similar between the two groups (SG =  
21 30.8% vs CG = 26.6%, p=0.14). These findings are consistent with expected effects  
22 regarding the impact of corticosteroid therapy in potential organ donors.  
23  
24  
25  
26  
27  
28  
29  
30  
31  
32  
33  
34  
35  
36

37 This systematic review highlights three types of challenges to research addressing  
38 the medical management of deceased organ donors: the scarcity of donors; practical  
39 challenges of studying therapeutic interventions and subsequent outcomes among very  
40 separate study populations, (i.e., organ donors and transplant recipients); and the  
41 complexity of definitions of graft function. To better guide clinical management of  
42 deceased donors will require strong research collaborations among donation and  
43 transplantation communities at a national or even international level. Scientifically  
44 sound, large clinical trials ideally will enrol consecutive eligible deceased donors,  
45 administer a single experimental steroid therapy in a blinded fashion, and measure  
46  
47  
48  
49  
50  
51  
52  
53  
54  
55  
56  
57  
58  
59  
60

1  
2  
3 outcomes not only among donors but also transplant recipients in a manner that allows  
4 the integration of transplant outcomes across organ groups. To achieve these goals  
5  
6 the integration of transplant outcomes across organ groups. To achieve these goals  
7  
8 may even require modification of current health services in donation and transplantation.  
9

## 10 **CONCLUSION**

11  
12 Current clinical trials do not identify benefits of corticosteroid therapy for deceased  
13 organ donors or their transplant recipients. The quality of this evidence is insufficient,  
14 however, to rule out the possibility of benefits or harms with respect to donation rates or  
15 transplant outcomes for any organ. In light of these results, there is no imperative to  
16 modify current recommendations for clinical care, based on observational studies, to  
17 consider corticosteroid therapy in the management of organ donors.  
18  
19  
20  
21  
22  
23  
24  
25  
26  
27

## 28 **ACKNOWLEDGEMENTS**

29  
30 None  
31  
32  
33  
34

## 35 **SOURCE OF FUNDING**

36  
37 None  
38  
39  
40  
41

## 42 **FIGURE LEGEND**

43  
44 Figure 1: Flow Diagram  
45

46  
47 Figure 2: Risk of Bias across the Included Studies  
48

49  
50 Figure 3: The Effect of Corticosteroids on Vasopressor Requirement  
51

52  
53 Figure 4: The Effect of Corticosteroids on Successful Donation of More Than One Organ  
54  
55  
56  
57  
58  
59  
60

1  
2  
3 Figure 5: The Effect of Corticosteroids on Acute Graft Rejection at Three Months

4  
5 Figure 6: Forest Plot of the Effect of Corticosteroids on Graft Dysfunction  
6  
7  
8  
9

## 10 **STATEMENT**

11  
12 All authors have made material contributions to this manuscript according to the rules of  
13 authorship of ICMJE. Specifically, here are the contributions of each author:  
14

15  
16 F D'Aragon: Conception of the design, acquisition of data, analysis and interpretation of  
17 the data, draft and revised the manuscript, approved the final version to be published;  
18  
19

20  
21 E Belley Cote: Conception of the design, acquisition of data, analysis and interpretation  
22 of the data, draft and revised the manuscript and approved final version to be published;  
23  
24

25  
26 A Argawal: Conception of the design, acquisition and analysis of the data, draft and  
27 revised the manuscript, approved final version to be published;  
28  
29

30  
31 AJ Frenette: Conception of the design, acquisition and analysis of the data, draft and  
32 revised manuscript and approved the final version to be published;  
33  
34

35  
36 F Lamontagne: Conception of the design, acquisition and analysis of the data, draft and  
37 revised manuscript and approved the final version to be published;  
38  
39

40  
41 G Guyatt: Conception of the design, acquisition and analysis of the data, draft and  
42 revised the manuscript and approved the final version to be published;  
43  
44

45  
46 S Dhanani: Conception of the design, acquisition and analysis of the data, draft and  
47 revised the manuscript and approved the final version to be published;  
48  
49

50  
51 M Meade: Conception of the design, data acquisition and analysis, draft and revised the  
52 manuscript and approved the final version to be published.  
53

54 All authors report no competing interest.  
55  
56  
57  
58  
59  
60

1  
2  
3 No funding was obtained for the completion of this work.  
4

5 There isn't any additional data from this work.  
6  
7  
8  
9  
10  
11  
12  
13  
14  
15  
16  
17  
18  
19  
20  
21  
22  
23  
24  
25  
26  
27  
28  
29  
30  
31  
32  
33  
34  
35  
36  
37  
38  
39  
40  
41  
42  
43  
44  
45  
46  
47  
48  
49  
50  
51  
52  
53  
54  
55  
56  
57  
58  
59  
60

For peer review only

## REFERENCES

1. Deceased Organ Donor Potential in Canada [Internet]. 2014.
2. Rosendale JD, Chabalewski FL, McBride MA, Garrity ER, Rosengard BR, Delmonico FL, et al. Increased transplanted organs from the use of a standardized donor management protocol. *Am J Transplant*. 2002 Sep;2(8):761-8. PubMed PMID: 12243497. Epub 2002/09/24. eng.
3. Dhanani S, Shemie SD. Advancing the science of organ donor management. *Crit Care*. 2014;18(6):612. PubMed PMID: 25672523. Pubmed Central PMCID: PMC4331331. Epub 2015/02/13. eng.
4. Shemie SD. *Resuscitation and stabilization of the critically ill child*. 1st ed2009.
5. Cooper DK, Novitzky D, Wicomb WN, Basker M, Rosendale JD, Myron Kauffman H. A review of studies relating to thyroid hormone therapy in brain-dead organ donors. *Frontiers in bioscience (Landmark edition)*. 2009;14:3750-70. PubMed PMID: 19273308. Epub 2009/03/11. eng.
6. Dimopoulou I, Tsagarakis S, Anthi A, Milou E, Ilias I, Stavrakaki K, et al. High prevalence of decreased cortisol reserve in brain-dead potential organ donors. *Critical care medicine*. 2003 Apr;31(4):1113-7. PubMed PMID: 12682481. Epub 2003/04/19. eng.
7. Gramm HJ, Meinhold H, Bickel U, Zimmermann J, von Hammerstein B, Keller F, et al. Acute endocrine failure after brain death? *Transplantation*. 1992 Nov;54(5):851-7. PubMed PMID: 1332223. Epub 1992/11/01. eng.
8. Howlett TA, Keogh AM, Perry L, Touzel R, Rees LH. Anterior and posterior pituitary function in brain-stem-dead donors. A possible role for hormonal replacement therapy. *Transplantation*. 1989 May;47(5):828-34. PubMed PMID: 2718243. Epub 1989/05/01. eng.
9. Nicolas-Robin A, Barouk JD, Darnal E, Riou B, Langeron O. Free cortisol and accuracy of total cortisol measurements in the diagnosis of adrenal insufficiency in brain-dead patients. *Anesthesiology*. 2011 Sep;115(3):568-74. PubMed PMID: 21795963. Epub 2011/07/29. eng.
10. Barklin A. Systemic inflammation in the brain-dead organ donor. *Acta Anaesthesiol Scand*. 2009 Apr;53(4):425-35. PubMed PMID: 19226294. Epub 2009/02/20. eng.
11. Smith M. Physiologic changes during brain stem death--lessons for management of the organ donor. *J Heart Lung Transplant*. 2004 Sep;23(9 Suppl):S217-22. PubMed PMID: 15381167. Epub 2004/09/24. eng.
12. Murugan R, Venkataraman R, Wahed AS, Elder M, Carter M, Madden NJ, et al. Preload responsiveness is associated with increased interleukin-6 and lower organ yield from brain-dead donors. *Critical care medicine*. 2009 Aug;37(8):2387-93. PubMed PMID: 19531941. Pubmed Central PMCID: PMC2864555. Epub 2009/06/18. eng.
13. Birks EJ, Owen VJ, Burton PB, Bishop AE, Banner NR, Khaghani A, et al. Tumor necrosis factor-alpha is expressed in donor heart and predicts right ventricular failure after human heart transplantation. *Circulation*. 2000 Jul 18;102(3):326-31. PubMed PMID: 10899097. Epub 2000/07/19. eng.
14. Lopau K, Mark J, Schramm L, Heidbreder E, Wanner C. Hormonal changes in brain death and immune activation in the donor. *Transpl Int*. 2000;13 Suppl 1:S282-5. PubMed PMID: 11112013. Epub 2000/12/09. eng.

15. Kotloff RM, Blosser S, Fulda GJ, Malinoski D, Ahya VN, Angel L, et al. Management of the Potential Organ Donor in the ICU: Society of Critical Care Medicine/American College of Chest Physicians/Association of Organ Procurement Organizations Consensus Statement. *Critical care medicine*. 2015 Jun;43(6):1291-325. PubMed PMID: 25978154. Epub 2015/05/16. eng.
16. Dupuis S, Amiel JA, Desgroseilliers M, Williamson DR, Thiboutot Z, Serri K, et al. Corticosteroids in the management of brain-dead potential organ donors: a systematic review. *Br J Anaesth*. 2014 Sep;113(3):346-59. PubMed PMID: 24980425. Epub 2014/07/02. eng.
17. Guyatt GH, Oxman AD, Vist GE, Kunz R, Falck-Ytter Y, Alonso-Coello P, et al. GRADE: an emerging consensus on rating quality of evidence and strength of recommendations. *BMJ*. 2008 Apr 26;336(7650):924-6. PubMed PMID: 18436948. Pubmed Central PMCID: PMC2335261.
18. Moher D, Liberati A, Tetzlaff J, Altman DG. Preferred reporting items for systematic reviews and meta-analyses: the PRISMA statement. *BMJ (Clinical research ed)*. 2009 Jul 21;339:b2535. PubMed PMID: 19622551. Pubmed Central PMCID: PMC2714657. Epub 2009/07/23. eng.
19. Higgins Julian PT GS. *Cochrane Handbook for Systematic Reviews of Interventions* <http://handbook.cochrane.org/>; Cochrane Collaboration; 2011.
20. Guyatt GH, Oxman AD, Vist G, Kunz R, Brozek J, Alonso-Coello P, et al. GRADE guidelines: 4. Rating the quality of evidence--study limitations (risk of bias). *J Clin Epidemiol*. 2011 Apr;64(4):407-15. PubMed PMID: 21247734.
21. Guyatt GH, Oxman AD, Kunz R, Brozek J, Alonso-Coello P, Rind D, et al. GRADE guidelines 6. Rating the quality of evidence--imprecision. *J Clin Epidemiol*. 2011 Dec;64(12):1283-93. PubMed PMID: 21839614. Epub 2011/08/16. eng.
22. Guyatt GH, Oxman AD, Kunz R, Woodcock J, Brozek J, Helfand M, et al. GRADE guidelines: 7. Rating the quality of evidence--inconsistency. *J Clin Epidemiol*. 2011 Dec;64(12):1294-302. PubMed PMID: 21803546.
23. Guyatt GH, Oxman AD, Kunz R, Woodcock J, Brozek J, Helfand M, et al. GRADE guidelines: 8. Rating the quality of evidence--indirectness. *J Clin Epidemiol*. 2011 Dec;64(12):1303-10. PubMed PMID: 21802903.
24. Guyatt GH, Oxman AD, Montori V, Vist G, Kunz R, Brozek J, et al. GRADE guidelines: 5. Rating the quality of evidence--publication bias. *J Clin Epidemiol*. 2011 Dec;64(12):1277-82. PubMed PMID: 21802904. Epub 2011/08/02. eng.
25. Chatterjee SN, Terasaki PI, Fine S, Schulman B, Smith R, Fine RN. Pretreatment of cadaver donors with methylprednisolone in human renal allografts. *Surg Gynecol Obstet*. 1977 Nov;145(5):729-32. PubMed PMID: 333644. Epub 1977/11/01. eng.
26. Kainz A, Wilflingseder J, Mitterbauer C, Haller M, Burghuber C, Perco P, et al. Steroid pretreatment of organ donors to prevent postischemic renal allograft failure: a randomized, controlled trial. *Ann Intern Med*. 2010 Aug 17;153(4):222-30. PubMed PMID: 20713790. Epub 2010/08/18. eng.
27. Mariot J, Jacob F, Voltz C, Perrier JF, Strub P. [Value of hormonal treatment with triiodothyronine and cortisone in brain dead patients]. *Ann Fr Anesth Reanim*. 1991;10(4):321-8. PubMed PMID: 1928853. Epub 1991/01/01. Interet de l'hormonotherapie associant triiodothyronine et cortisone chez le patient en etat de mort cerebrale. fre.

- 1
- 2
- 3 28. Venkateswaran RV, Steeds RP, Quinn DW, Nightingale P, Wilson IC, Mascaro
- 4 JG, et al. The haemodynamic effects of adjunctive hormone therapy in potential heart
- 5 donors: a prospective randomized double-blind factorially designed controlled trial. *Eur*
- 6 *Heart J.* 2009 Jul;30(14):1771-80. PubMed PMID: 19324916. Epub 2009/03/28. eng.
- 7
- 8 29. Kotsch K, Ulrich F, Reutzel-Selke A, Pascher A, Faber W, Warnick P, et al.
- 9 Methylprednisolone therapy in deceased donors reduces inflammation in the donor liver
- 10 and improves outcome after liver transplantation: a prospective randomized controlled
- 11 trial. *Ann Surg.* 2008 Dec;248(6):1042-50. PubMed PMID: 19092349. Epub 2008/12/19.
- 12 eng.
- 13
- 14 30. Amatschek S, Wilflingseder J, Pones M, Kainz A, Bodingbauer M, Muhlbacher F,
- 15 et al. The effect of steroid pretreatment of deceased organ donors on liver allograft
- 16 function: a blinded randomized placebo-controlled trial. *J Hepatol.* 2012 Jun;56(6):1305-
- 17 9. PubMed PMID: 22326464. Pubmed Central PMCID: PMC3355301. Epub 2012/02/14.
- 18 eng.
- 19
- 20 31. Corry RJ, Patel NP, West JC, Schanbacher BA. Pretreatment of cadaver donors
- 21 with cyclophosphamide and methylprednisolone: effect on renal transplant outcome.
- 22 *Transplant Proc.* 1980 Jun;12(2):348-51. PubMed PMID: 6994305. Epub 1980/06/01.
- 23 eng.
- 24
- 25 32. Dienst SG. Statewide donor pretreatment study. *Transplant Proc.* 1977
- 26 Sep;9(3):1597-9. PubMed PMID: 331595. Epub 1977/09/01. eng.
- 27
- 28 33. Jeffery JR, Downs A, Grahame JW, Lye C, Ramsey E, Thomson AE. A
- 29 randomized prospective study of cadaver donor pretreatment in renal transplantation.
- 30 *Transplantation.* 1978 Jun;25(6):287-9. PubMed PMID: 351886. Epub 1978/06/01. eng.
- 31
- 32 34. Souillou JP, Baron D, Rouxel A, Guenel J. Steroid-cyclophosphamide
- 33 pretreatment of kidney allograft donors. A control study. *Nephron.* 1979;24(4):193-7.
- 34 PubMed PMID: 386157. Epub 1979/01/01. eng.
- 35
- 36 35. Venkateswaran RV, Patchell VB, Wilson IC, Mascaro JG, Thompson RD, Quinn
- 37 DW, et al. Early donor management increases the retrieval rate of lungs for
- 38 transplantation. *Ann Thorac Surg.* 2008 Jan;85(1):278-86; discussion 86. PubMed
- 39 PMID: 18154823. Epub 2007/12/25. eng.
- 40
- 41 36. Venkateswaran RV, Dronavalli V, Patchell V, Wilson I, Mascaro J, Thompson R,
- 42 et al. Measurement of extravascular lung water following human brain death:
- 43 implications for lung donor assessment and transplantation. *Eur J Cardiothorac Surg.*
- 44 2013 Jun;43(6):1227-32. PubMed PMID: 23277434. Epub 2013/01/02. eng.
- 45
- 46 37. Akl EA, Sun X, Busse JW, Johnston BC, Briel M, Mulla S, et al. Specific
- 47 instructions for estimating unclearly reported blinding status in randomized trials were
- 48 reliable and valid. *Journal of clinical epidemiology.* 2012 Mar;65(3):262-7. PubMed
- 49 PMID: 22200346. Epub 2011/12/28. eng.
- 50
- 51 38. Rech TH, Moraes RB, Crispim D, Czepielewski MA, Leitao CB. Management of
- 52 the brain-dead organ donor: a systematic review and meta-analysis. *Transplantation.*
- 53 2013 Apr 15;95(7):966-74. PubMed PMID: 23545508. Epub 2013/04/03. eng.
- 54
- 55 39. Shemie SD, Ross H, Pagliarello J, Baker AJ, Greig PD, Brand T, et al. Organ
- 56 donor management in Canada: recommendations of the forum on Medical Management
- 57 to Optimize Donor Organ Potential. *CMAJ.* 2006 Mar 14;174(6):S13-32. PubMed PMID:
- 58 16534070. Pubmed Central PMCID: PMC1402396. Epub 2006/03/15. eng
- 59 fre.
- 60



1  
2  
3 40. Pinsard M, Ragot S, Mertes PM, Bleichner JP, Zitouni S, Cook F, et al. Interest of  
4 low-dose hydrocortisone therapy during brain-dead organ donor resuscitation: the  
5 CORTICOME study. Crit Care. 2014 Jul 23;18(4):R158. PubMed PMID: 25056510.  
6 Pubmed Central PMCID: PMC4220083. Epub 2014/07/25. eng.  
7  
8  
9  
10  
11  
12  
13  
14  
15  
16  
17  
18  
19  
20  
21  
22  
23  
24  
25  
26  
27  
28  
29  
30  
31  
32  
33  
34  
35  
36  
37  
38  
39  
40  
41  
42  
43  
44  
45  
46  
47  
48  
49  
50  
51  
52  
53  
54  
55  
56  
57  
58  
59  
60

1  
2  
3  
4  
5  
6  
7  
8  
9  
10  
11  
12  
13  
14  
15  
16  
17  
18  
19  
20  
21  
22  
23  
24  
25  
26  
27  
28  
29  
30  
31  
32  
33  
34  
35  
36  
37  
38  
39  
40  
41  
42  
43  
44  
45  
46  
47  
48  
49  
50  
51  
52  
53  
54  
55  
56  
57  
58  
59  
60

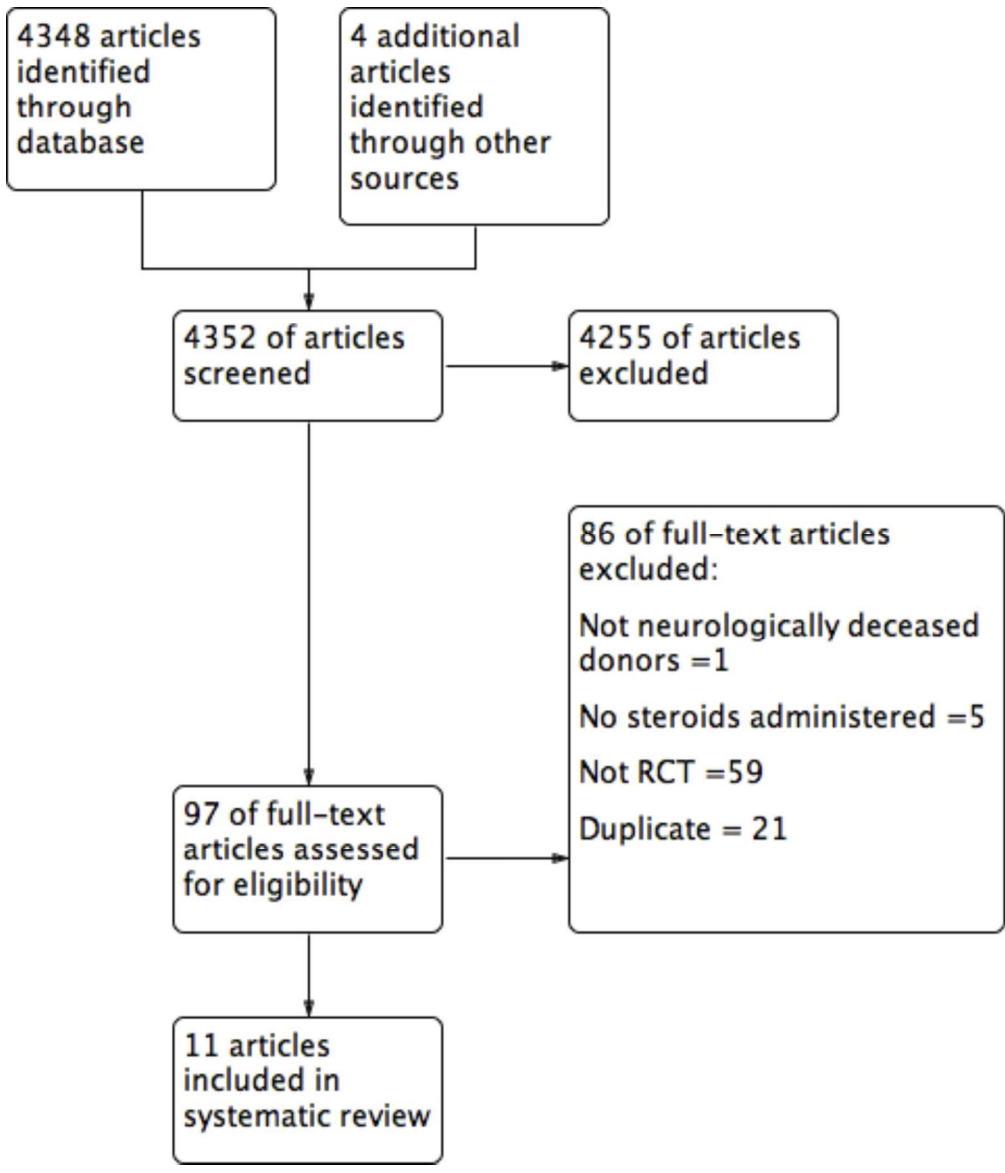

173x200mm (300 x 300 DPI)

1  
2  
3  
4  
5  
6  
7  
8  
9  
10  
11  
12  
13  
14  
15  
16  
17  
18  
19  
20  
21  
22  
23  
24  
25  
26  
27  
28  
29  
30  
31  
32  
33  
34  
35  
36  
37  
38  
39  
40  
41  
42  
43  
44  
45  
46  
47  
48  
49  
50  
51  
52  
53  
54  
55  
56  
57  
58  
59  
60

|                    | Random sequence generation (selection bias) | Allocation concealment (selection bias) | Blinding of participants and personnel (performance bias) | Blinding of outcome assessment (detection bias) | Incomplete outcome data (attrition bias) | Selective reporting (reporting bias) | Other bias |
|--------------------|---------------------------------------------|-----------------------------------------|-----------------------------------------------------------|-------------------------------------------------|------------------------------------------|--------------------------------------|------------|
| Amatschek 2012     | +                                           | +                                       | +                                                         | ?                                               | +                                        | +                                    | +          |
| Chatterjee 1977    | +                                           | +                                       | -                                                         | ?                                               | -                                        | +                                    | -          |
| Corry 1980         | -                                           | ?                                       | -                                                         | ?                                               | -                                        | +                                    | -          |
| Dienst 1977        | -                                           | ?                                       | -                                                         | ?                                               | -                                        | +                                    | -          |
| Jeffery 1978       | +                                           | ?                                       | -                                                         | ?                                               | -                                        | ?                                    | -          |
| Kainz 2010         | +                                           | +                                       | +                                                         | ?                                               | +                                        | +                                    | +          |
| Kotsch 2008        | ?                                           | ?                                       | -                                                         | +                                               | +                                        | ?                                    | +          |
| Mariot 1991        | +                                           | ?                                       | +                                                         | ?                                               | +                                        | ?                                    | ?          |
| Soulillou 1979     | -                                           | ?                                       | +                                                         | ?                                               | -                                        | +                                    | -          |
| Venkateswaran 2008 | +                                           | +                                       | +                                                         | ?                                               | +                                        | -                                    | -          |
| Venkateswaran 2009 | +                                           | +                                       | +                                                         | ?                                               | +                                        | +                                    | -          |

270x349mm (300 x 300 DPI)

1  
2  
3  
4  
5  
6  
7  
8  
9  
10  
11  
12  
13  
14  
15  
16  
17  
18  
19  
20  
21  
22  
23  
24  
25  
26  
27  
28  
29  
30  
31  
32  
33  
34  
35  
36  
37  
38  
39  
40  
41  
42  
43  
44  
45  
46  
47  
48  
49  
50  
51  
52  
53  
54  
55  
56  
57  
58  
59  
60

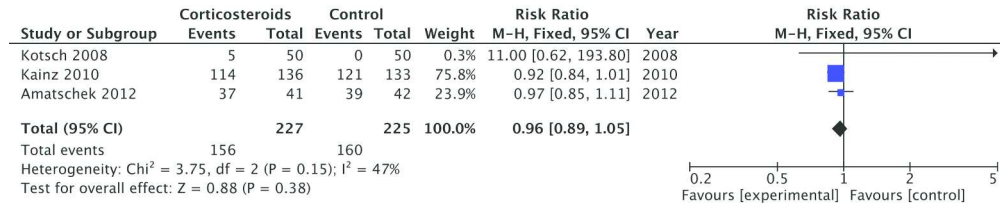

195x40mm (300 x 300 DPI)

For peer review only

1  
2  
3  
4  
5  
6  
7  
8  
9  
10  
11  
12  
13  
14  
15  
16  
17  
18  
19  
20  
21  
22  
23  
24  
25  
26  
27  
28  
29  
30  
31  
32  
33  
34  
35  
36  
37  
38  
39  
40  
41  
42  
43  
44  
45  
46  
47  
48  
49  
50  
51  
52  
53  
54  
55  
56  
57  
58  
59  
60

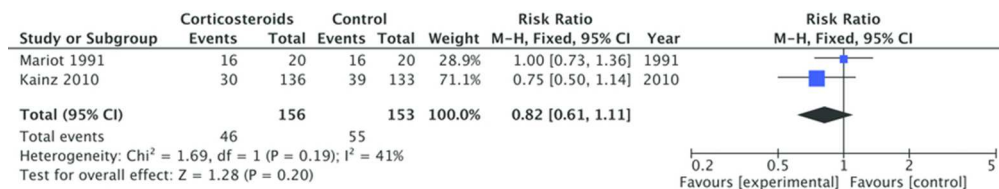

37x7mm (600 x 600 DPI)

For peer review only

1  
2  
3  
4  
5  
6  
7  
8  
9  
10  
11  
12  
13  
14  
15  
16  
17  
18  
19  
20  
21  
22  
23  
24  
25  
26  
27  
28  
29  
30  
31  
32  
33  
34  
35  
36  
37  
38  
39  
40  
41  
42  
43  
44  
45  
46  
47  
48  
49  
50  
51  
52  
53  
54  
55  
56  
57  
58  
59  
60

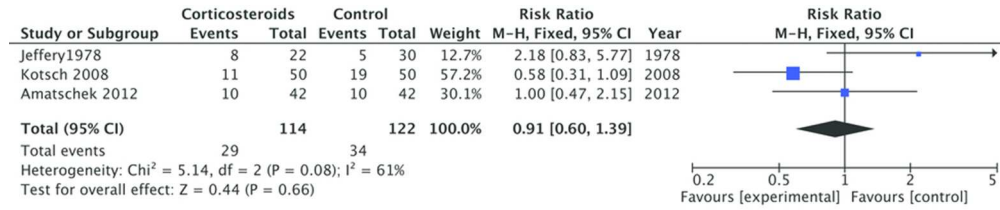

41x8mm (600 x 600 DPI)

For peer review only

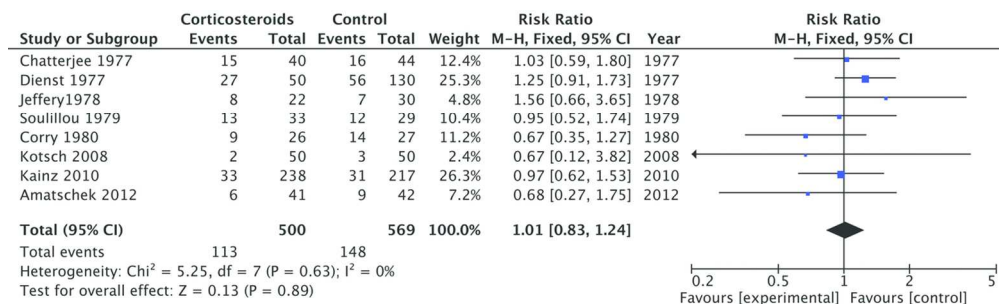

59x18mm (600 x 600 DPI)

peer review only

## APPENDIX 1: Search Strategy Medline

1. steroids/ or steroids, brominated/ or steroids, chlorinated/ or beclomethasone/ or chlormadinone acetate/ or cyproterone/ or cyproterone acetate/ or steroids, fluorinated/ or betamethasone/ or betamethasone 17-valerate/ or clobetasol/ or dexamethasone/ or desoximetasone/ or dexamethasone isonicotinate/ or flumethasone/ or fluocinolone acetonide/ or fluocinonide/ or fluocortolone/ or diflucortolone/ or fluorometholone/ or fluoxymesterone/ or fluprednisolone/ or flurandrenolone/ or flurogestone acetate/ or paramethasone/ or triamcinolone/ or triamcinolone acetonide/ or steroids, heterocyclic/ or azasteroids/ or finasteride/
2. glucocorticoids/ or beclomethasone/ or betamethasone/ or betamethasone 17-valerate/ or budesonide/ or clobetasol/ or desoximetasone/ or dexamethasone/ or dexamethasone isonicotinate/ or diflucortolone/ or flumethasone/ or fluocinolone acetonide/ or fluocinonide/ or fluocortolone/ or fluorometholone/ or fluprednisolone/ or flurandrenolone/ or melengestrol acetate/ or methylprednisolone/ or methylprednisolone hemisuccinate/ or paramethasone/ or prednisolone/ or prednisone/ or triamcinolone/ or triamcinolone acetonide/
3. anti-inflammatory agents/ or algestone acetophenide/ or beclomethasone/ or benzydamine/ or betamethasone/ or betamethasone 17-valerate/ or budesonide/ or clobetasol/ or corticosterone/ or cortisone/ or desonide/ or desoximetasone/ or dexamethasone/ or dexamethasone isonicotinate/ or diflucortolone/ or fludrocortisone/ or flufenamic acid/ or flumethasone/ or fluocinolone acetonide/ or fluocinonide/ or fluocortolone/ or fluorometholone/ or fluprednisolone/ or flurandrenolone/ or hydrocortisone/ or methylprednisolone/ or methylprednisolone hemisuccinate/ or nedocromil/ or paramethasone/ or prednisolone/ or prednisone/ or tilorone/ or triamcinolone/ or triamcinolone acetonide/
4. glucocorticoid\*.ti,ab.
5. methylprednisolone.ti,ab.
6. hydrocortisone.ti,ab.
7. dexamethasone.ti,ab.
8. corticosteroid.ti,ab.
9. medrol.mp.
10. or/1-9
11. "tissue and organ procurement"/ or directed tissue donation/ or donor selection/
12. Transplantation/ or unrelated donors/
13. Organ transplantation/ or heart transplantation/ or heart-lung transplantation/ or kidney transplantation/ or liver transplantation/ or lung transplantation/or pancreas transplantation
14. donor management.mp
15. "tissue and organ harvesting"/or donor selection/
16. organ harvesting.mp.
17. donor pretreatment.mp
18. organ donor.mp
19. organ donation.mp.
20. organ donation\*.ti,ab.



- 1
- 2
- 3 21. organ transplantation/
- 4 22. or/11-21
- 5 23. brain death/
- 6 24. (brain adj1 (death or dead or deads)).mp.
- 7 25. irreversible coma.mp
- 8 26. coma depasse.mp
- 9 27. (neurologic\*adj1 (death or Dead or deads)).mp.
- 10 28. deceased.mp
- 11 29. or/23-28
- 12 30.10 and 22 and 29
- 13 31.brain Dead donor\*.mp.
- 14 32.deceased donor\*.mp.
- 15 33.31 or 32
- 16 34.10 and 33
- 17 35.30 and 34
- 18 36.(retrieval adj3.donor\*).mp.
- 19 37.organ harvesting.mp.
- 20 38.organ donation.ti,ab.
- 21 39.organ donor\*.mp.
- 22 40.(potential adj3 donors\*).mp.
- 23 41.or/36-40
- 24 42.10 and 41
- 25 43.30 or 34 aor 42
- 26 44.Animals/
- 27 45.Humans/
- 28 46.44 not (44 and 45)
- 29 47.43 not 46
- 30 48.Methylprednisolone Therapy in Deceased Donors Reduces.m\_titl.
- 31 49.Early donor management increases the retrieval rate of lungs.m\_titl.
- 32 50.Steroid pretreatment of organ donors to prevent postischemic.m\_titl.
- 33 51.The haemodynamic effects of adjunctive hormone therapy in potential heart.m\_titl.
- 34 52.or/ 8-51
- 35 53.43 or 52
- 36
- 37
- 38
- 39
- 40
- 41
- 42
- 43
- 44
- 45
- 46
- 47
- 48
- 49
- 50
- 51
- 52
- 53
- 54
- 55
- 56
- 57
- 58
- 59
- 60

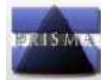

# PRISMA 2009 Checklist

| Section/topic                      | #  | Checklist item                                                                                                                                                                                                                                                                                              | Reported on page # |
|------------------------------------|----|-------------------------------------------------------------------------------------------------------------------------------------------------------------------------------------------------------------------------------------------------------------------------------------------------------------|--------------------|
| <b>TITLE</b>                       |    |                                                                                                                                                                                                                                                                                                             |                    |
| Title                              | 1  | Identify the report as a systematic review, meta-analysis, or both.                                                                                                                                                                                                                                         | 1                  |
| <b>ABSTRACT</b>                    |    |                                                                                                                                                                                                                                                                                                             |                    |
| Structured summary                 | 2  | Provide a structured summary including, as applicable: background; objectives; data sources; study eligibility criteria, participants, and interventions; study appraisal and synthesis methods; results; limitations; conclusions and implications of key findings; systematic review registration number. | 2                  |
| <b>INTRODUCTION</b>                |    |                                                                                                                                                                                                                                                                                                             |                    |
| Rationale                          | 3  | Describe the rationale for the review in the context of what is already known.                                                                                                                                                                                                                              | 3                  |
| Objectives                         | 4  | Provide an explicit statement of questions being addressed with reference to participants, interventions, comparisons, outcomes, and study design (PICOS).                                                                                                                                                  | 3                  |
| <b>METHODS</b>                     |    |                                                                                                                                                                                                                                                                                                             |                    |
| Protocol and registration          | 5  | Indicate if a review protocol exists, if and where it can be accessed (e.g., Web address), and, if available, provide registration information including registration number.                                                                                                                               | S2                 |
| Eligibility criteria               | 6  | Specify study characteristics (e.g., PICOS, length of follow-up) and report characteristics (e.g., years considered, language, publication status) used as criteria for eligibility, giving rationale.                                                                                                      | 4                  |
| Information sources                | 7  | Describe all information sources (e.g., databases with dates of coverage, contact with study authors to identify additional studies) in the search and date last searched.                                                                                                                                  | 4                  |
| Search                             | 8  | Present full electronic search strategy for at least one database, including any limits used, such that it could be repeated.                                                                                                                                                                               | S1                 |
| Study selection                    | 9  | State the process for selecting studies (i.e., screening, eligibility, included in systematic review, and, if applicable, included in the meta-analysis).                                                                                                                                                   | 5                  |
| Data collection process            | 10 | Describe method of data extraction from reports (e.g., piloted forms, independently, in duplicate) and any processes for obtaining and confirming data from investigators.                                                                                                                                  | 5                  |
| Data items                         | 11 | List and define all variables for which data were sought (e.g., PICOS, funding sources) and any assumptions and simplifications made.                                                                                                                                                                       | 5                  |
| Risk of bias in individual studies | 12 | Describe methods used for assessing risk of bias of individual studies (including specification of whether this was done at the study or outcome level), and how this information is to be used in any data synthesis.                                                                                      | 5                  |
| Summary measures                   | 13 | State the principal summary measures (e.g., risk ratio, difference in means).                                                                                                                                                                                                                               | 5                  |
| Synthesis of results               | 14 | Describe the methods of handling data and combining results of studies, if done, including measures of consistency (e.g., $I^2$ ) for each meta-analysis.                                                                                                                                                   | 5                  |



# PRISMA 2009 Checklist

Page 1 of 2

| Section/topic                 | #  | Checklist item                                                                                                                                                                                           | Reported on page # |
|-------------------------------|----|----------------------------------------------------------------------------------------------------------------------------------------------------------------------------------------------------------|--------------------|
| Risk of bias across studies   | 15 | Specify any assessment of risk of bias that may affect the cumulative evidence (e.g., publication bias, selective reporting within studies).                                                             | 5                  |
| Additional analyses           | 16 | Describe methods of additional analyses (e.g., sensitivity or subgroup analyses, meta-regression), if done, indicating which were pre-specified.                                                         | 5                  |
| <b>RESULTS</b>                |    |                                                                                                                                                                                                          |                    |
| Study selection               | 17 | Give numbers of studies screened, assessed for eligibility, and included in the review, with reasons for exclusions at each stage, ideally with a flow diagram.                                          | 6                  |
| Study characteristics         | 18 | For each study, present characteristics for which data were extracted (e.g., study size, PICOS, follow-up period) and provide the citations.                                                             | 6                  |
| Risk of bias within studies   | 19 | Present data on risk of bias of each study and, if available, any outcome level assessment (see item 12).                                                                                                | 7                  |
| Results of individual studies | 20 | For all outcomes considered (benefits or harms), present, for each study: (a) simple summary data for each intervention group (b) effect estimates and confidence intervals, ideally with a forest plot. | 8                  |
| Synthesis of results          | 21 | Present results of each meta-analysis done, including confidence intervals and measures of consistency.                                                                                                  | 8                  |
| Risk of bias across studies   | 22 | Present results of any assessment of risk of bias across studies (see Item 15).                                                                                                                          | 8                  |
| Additional analysis           | 23 | Give results of additional analyses, if done (e.g., sensitivity or subgroup analyses, meta-regression [see Item 16]).                                                                                    | NA                 |
| <b>DISCUSSION</b>             |    |                                                                                                                                                                                                          |                    |
| Summary of evidence           | 24 | Summarize the main findings including the strength of evidence for each main outcome; consider their relevance to key groups (e.g., healthcare providers, users, and policy makers).                     | 10                 |
| Limitations                   | 25 | Discuss limitations at study and outcome level (e.g., risk of bias), and at review-level (e.g., incomplete retrieval of identified research, reporting bias).                                            | 11                 |
| Conclusions                   | 26 | Provide a general interpretation of the results in the context of other evidence, and implications for future research.                                                                                  | 13                 |
| <b>FUNDING</b>                |    |                                                                                                                                                                                                          |                    |
| Funding                       | 27 | Describe sources of funding for the systematic review and other support (e.g., supply of data); role of funders for the systematic review.                                                               | 14                 |

From: Moher D, Liberati A, Tetzlaff J, Altman DG, The PRISMA Group (2009). Preferred Reporting Items for Systematic Reviews and Meta-Analyses: The PRISMA Statement. PLoS Med 6(7): e1000097. doi:10.1371/journal.pmed1000097

For more information, visit: [www.prisma-statement.org](http://www.prisma-statement.org).

Page 2 of 2

For peer review only - <http://bmjopen.bmj.com/site/about/guidelines.xhtml>
