# Supplementary material for: Effect of corticosteroid administration on neurologically deceased organ donors and transplant recipients: a systematic review and meta-analysis
Source: PubMed Central journal article supplement — BMJ Open. 2017 Jun 30;7(6):e014436. doi: 10.1136/bmjopen-2016-014436 (PMC5734295; doi:10.1136/bmjopen-2016-014436), 2017-06-30
Supplement: bmjopen-2016-014436supp001.pdf [file bmjopen-2016-014436supp001.pdf]

## APPENDIX 1: Search Strategy Medline

1. steroids/ or steroids, brominated/ or steroids, chlorinated/ or beclomethasone/ or chlormadinone acetate/ or cyproterone/ or cyproterone acetate/ or steroids, fluorinated/ or betamethasone/ or betamethasone 17-valerate/ or clobetasol/ or dexamethasone/ or desoximetasone/ or dexamethasone isonicotinate/ or flumethasone/ or fluocinolone acetonide/ or fluocinonide/ or fluocortolone/ or diflucortolone/ or fluorometholone/ or fluoxymesterone/ or fluprednisolone/ or flurandrenolone/ or flurogestone acetate/ or paramethasone/ or triamcinolone/ or triamcinolone acetonide/ or steroids, heterocyclic/ or azasteroids/ or finasteride/
2. glucocorticoids/ or beclomethasone/ or betamethasone/ or betamethasone 17-valerate/ or budesonide/ or clobetasol/ or desoximetasone/ or dexamethasone/ or dexamethasone isonicotinate/ or diflucortolone/ or flumethasone/ or fluocinolone acetonide/ or fluocinonide/ or fluocortolone/ or fluorometholone/ or fluprednisolone/ or flurandrenolone/ or melengestrol acetate/ or methylprednisolone/ or methylprednisolone hemisuccinate/ or paramethasone/ or prednisolone/ or prednisone/ or triamcinolone/ or triamcinolone acetonide/
3. anti-inflammatory agents/ or algestone acetophenide/ or beclomethasone/ or benzydamine/ or betamethasone/ or betamethasone 17-valerate/ or budesonide/ or clobetasol/ or corticosterone/ or cortisone/ or desonide/ or desoximetasone/ or dexamethasone/ or dexamethasone isonicotinate/ or diflucortolone/ or fludrocortisone/ or flufenamic acid/ or flumethasone/ or fluocinolone acetonide/ or fluocinonide/ or fluocortolone/ or fluorometholone/ or fluprednisolone/ or flurandrenolone/ or hydrocortisone/ or methylprednisolone/ or methylprednisolone hemisuccinate/ or nedocromil/ or paramethasone/ or prednisolone/ or prednisone/ or tilorone/ or triamcinolone/ or triamcinolone acetonide/
4. glucocorticoid\*.ti,ab.
5. methylprednisolone.ti,ab.
6. hydrocortisone.ti,ab.
7. dexamethasone.ti,ab.
8. corticosteroid.ti,ab.
9. medrol.mp.
10. or/1-9
11. "tissue and organ procurement"/ or directed tissue donation/ or donor selection/
12. Transplantation/ or unrelated donors/
13. Organ transplantation/ or heart transplantation/ or heart-lung transplantation/ or kidney transplantation/ or liver transplantation/ or lung transplantation/or pancreas transplantation
14. donor management.mp
15. "tissue and organ harvesting"/or donor selection/
16. organ harvesting.mp.
17. donor pretreatment.mp
18. organ donor.mp
19. organ donation.mp.
20. organ donation\*.ti,ab.

21. organ transplantation/  
22. or/11-21  
23. brain death/  
24. (brain adj1 (death or dead or deads)).mp.  
25. irreversible coma.mp  
26. coma depasse.mp  
27. (neurologic\*adj1 (death or Dead or deads)).mp.  
28. deceased.mp  
29. or/23-28  
30.10 and 22 and 29  
31.brain Dead donor\*.mp.  
32.deceased donor\*.mp.  
33.31 or 32  
34.10 and 33  
35.30 and 34  
36.(retrieval adj3.donor\*).mp.  
37.organ harvesting.mp.  
38.organ donation.ti,ab.  
39.organ donor\*.mp.  
40.(potential adj3 donors\*).mp.  
41.or/36-40  
42.10 and 41  
43.30 or 34 aor 42  
44.Animals/  
45.Humans/  
46.44 not (44 and 45)  
47.43 not 46  
48.Methylprednisolone Therapy in Deceased Donors Reduces.m\_titl.  
49.Early donor management increases the retrieval rate of lungs.m\_titl.  
50.Steroid pretreatment of organ donors to prevent postischemic.m\_titl.  
51.The haemodynamic effects of adjunctive hormone therapy in potential heart.m\_titl.  
52.or/ 8-51  
53.43 or 52
